# Supplementary material for: Symptom-severity-related brain connectivity alterations in functional movement disorders
Source: PubMed Central journal article supplement (PMC8921488; doi:10.1016/j.nicl.2022.102981), 2022-03-03

# GCOR increase with FW

**A: FW > no-FW**

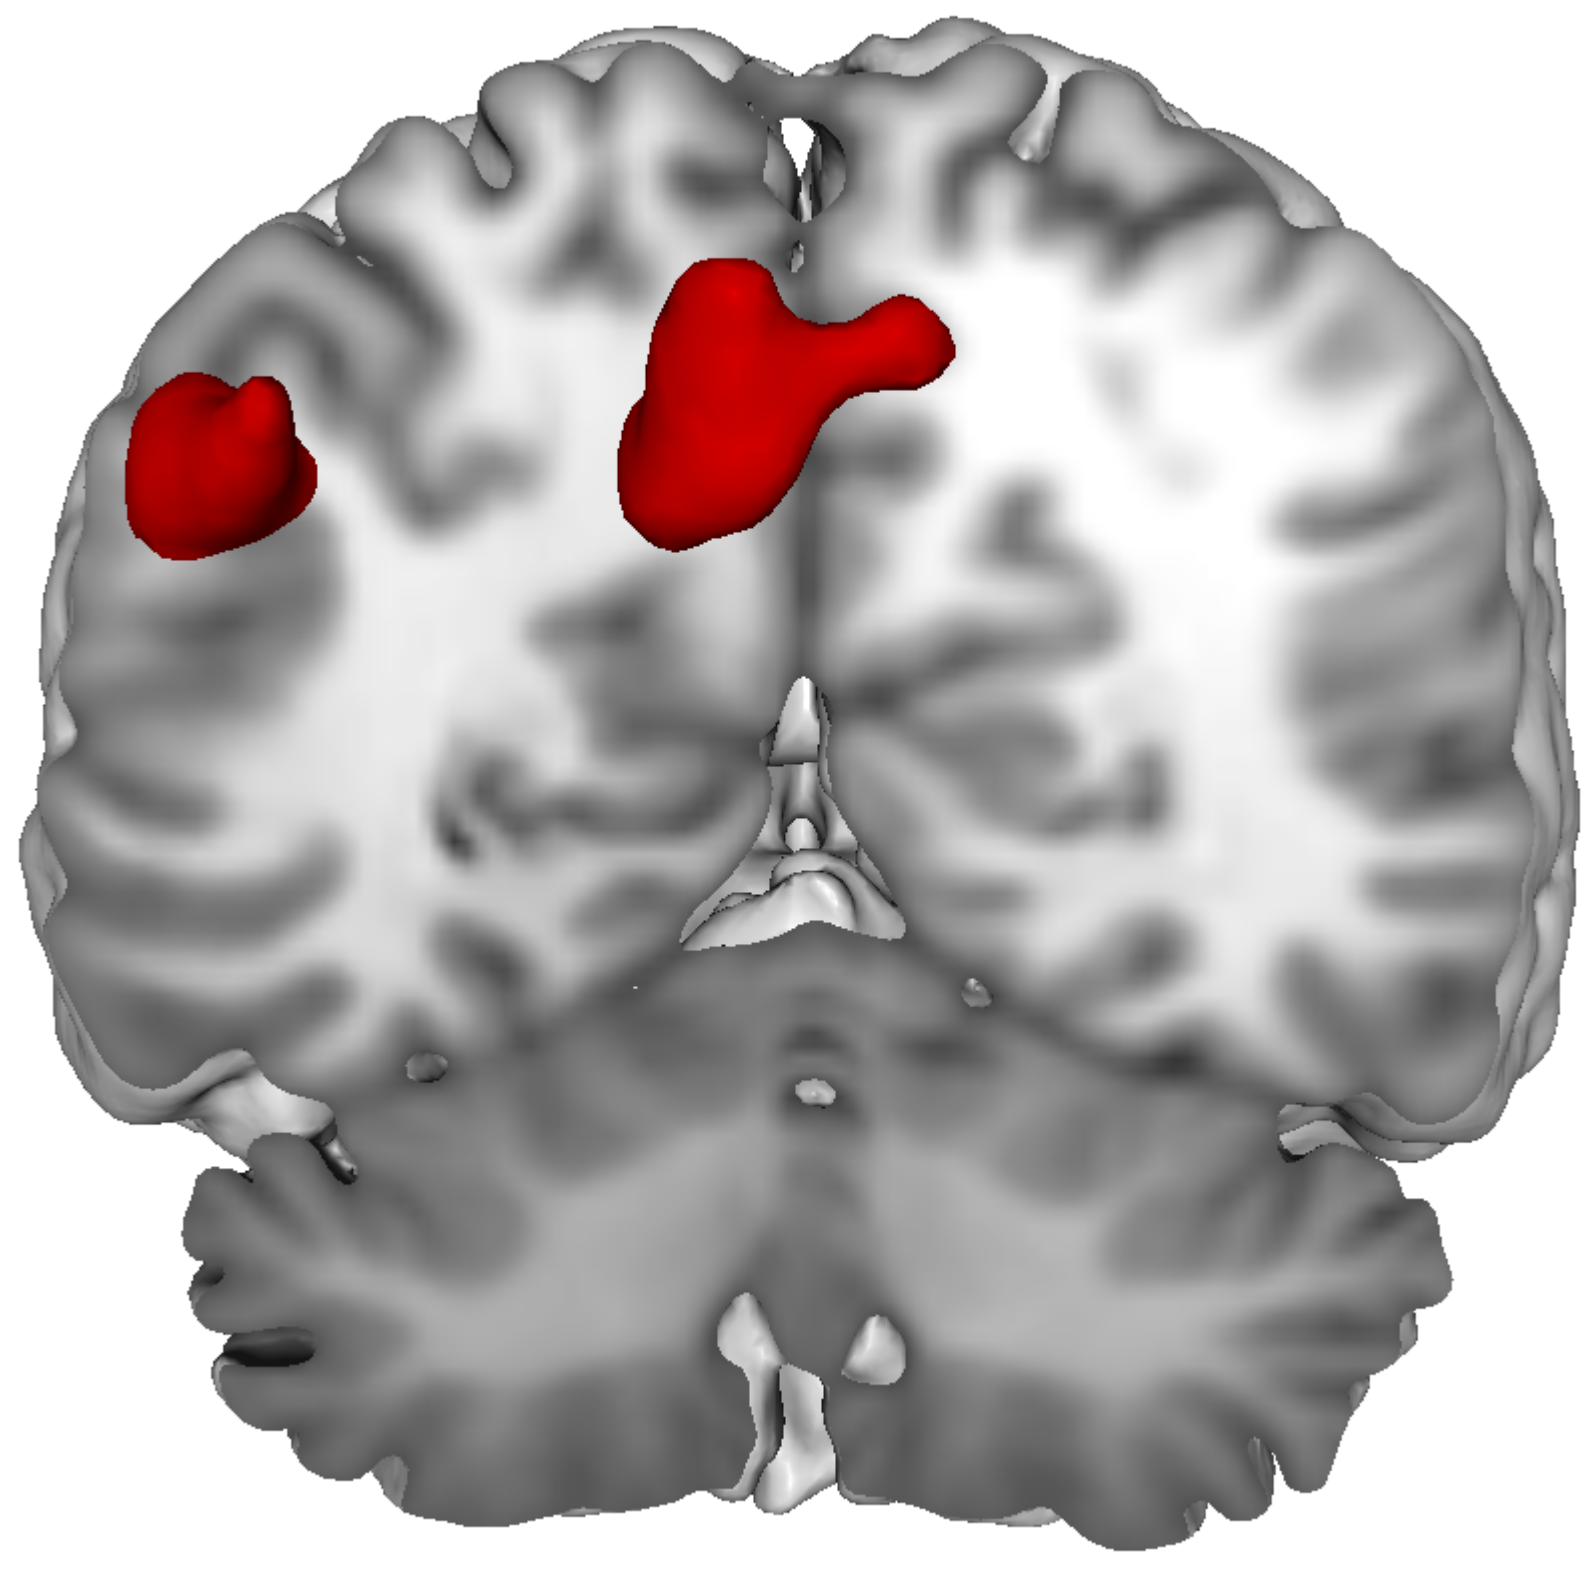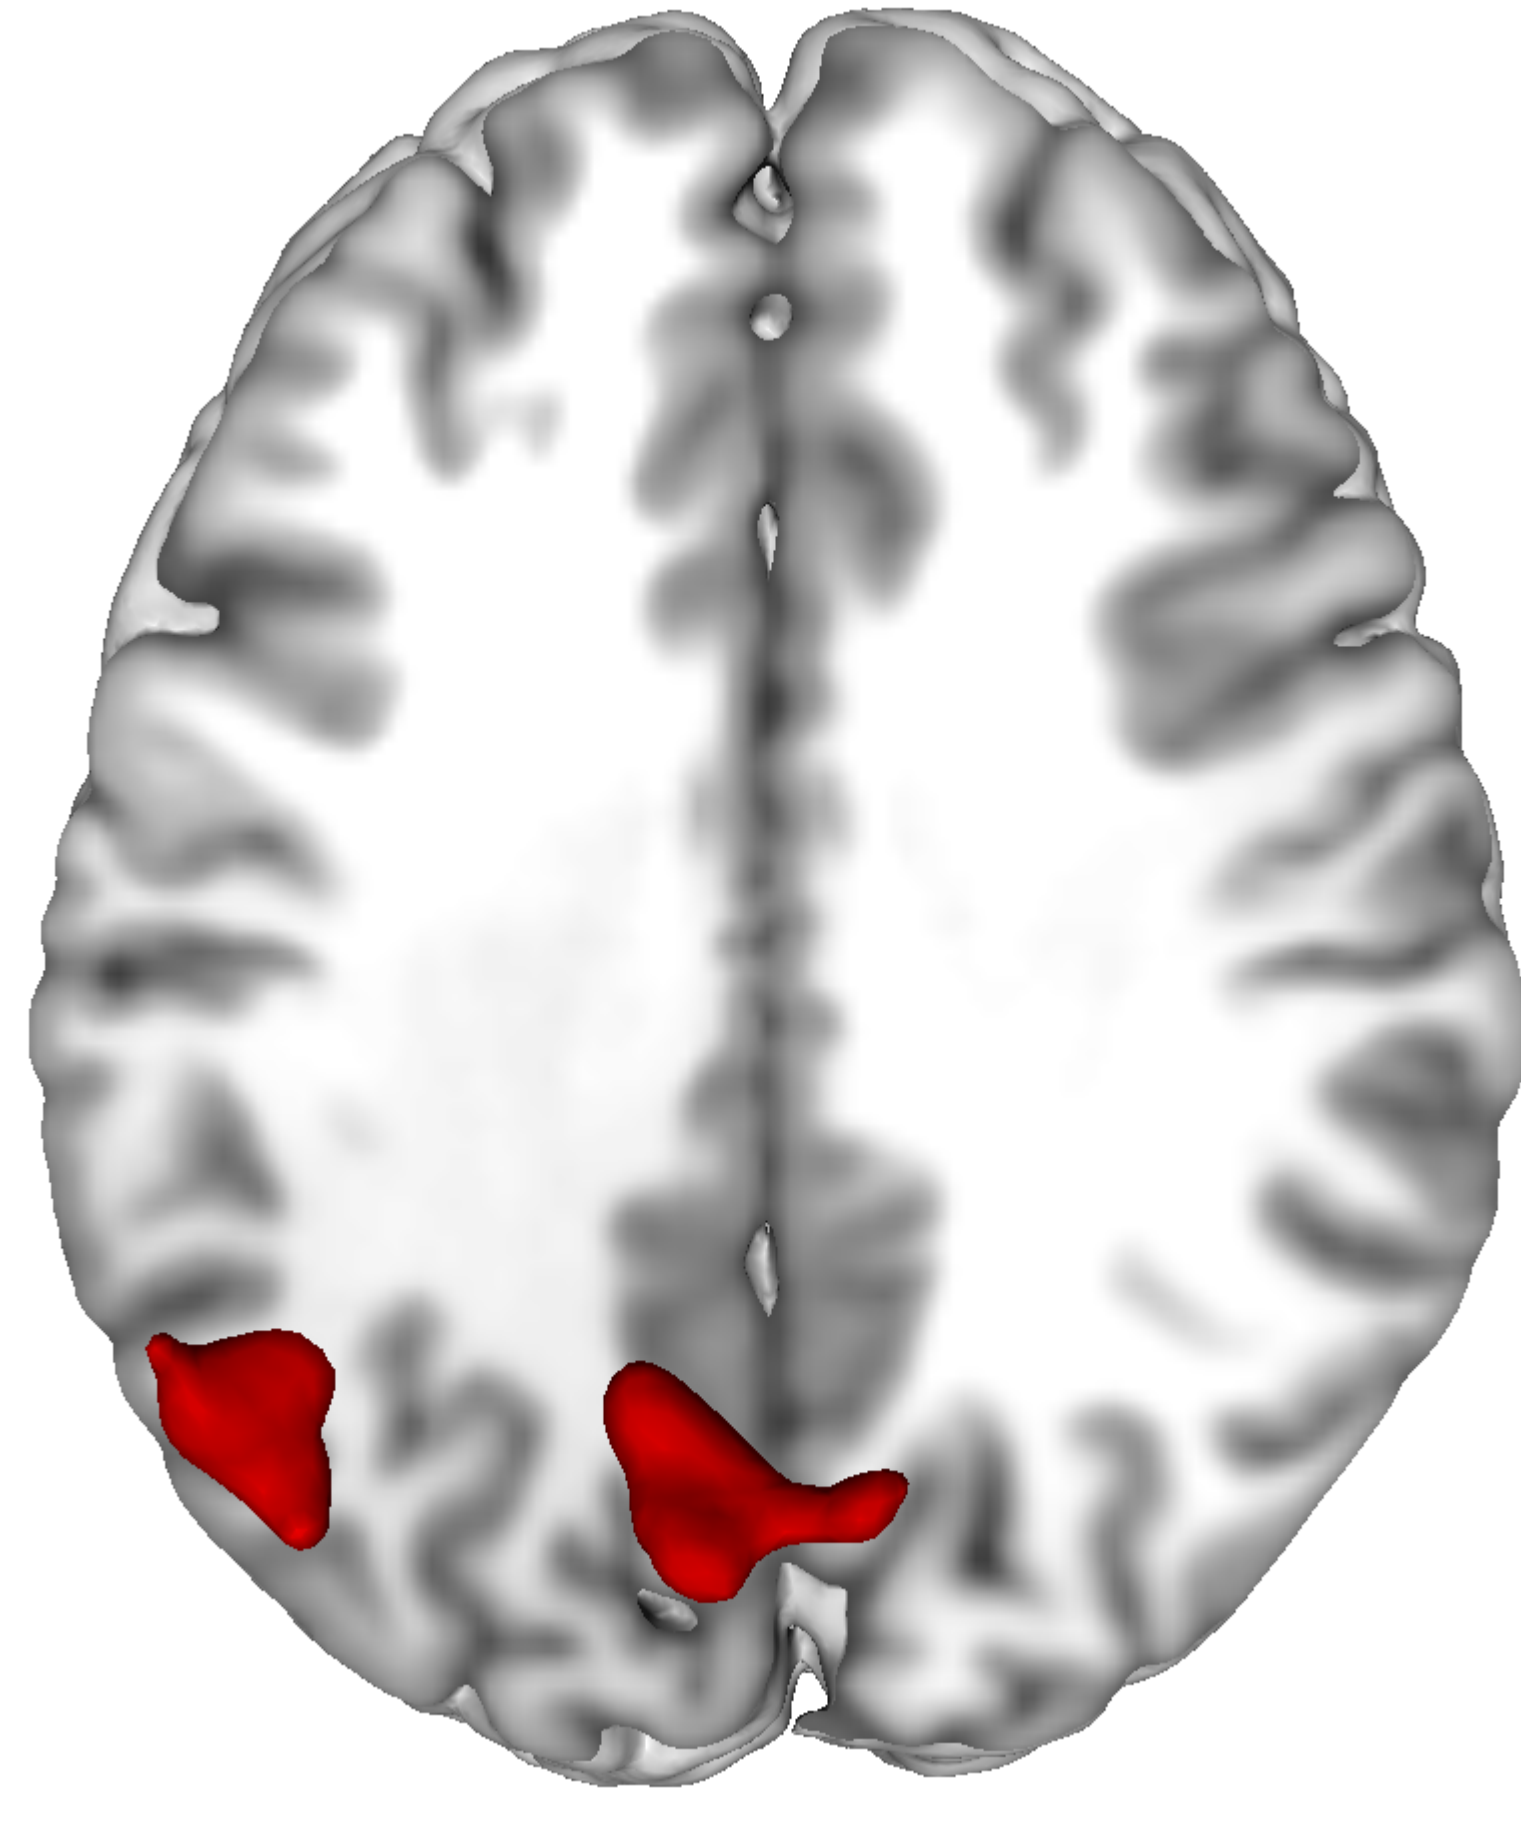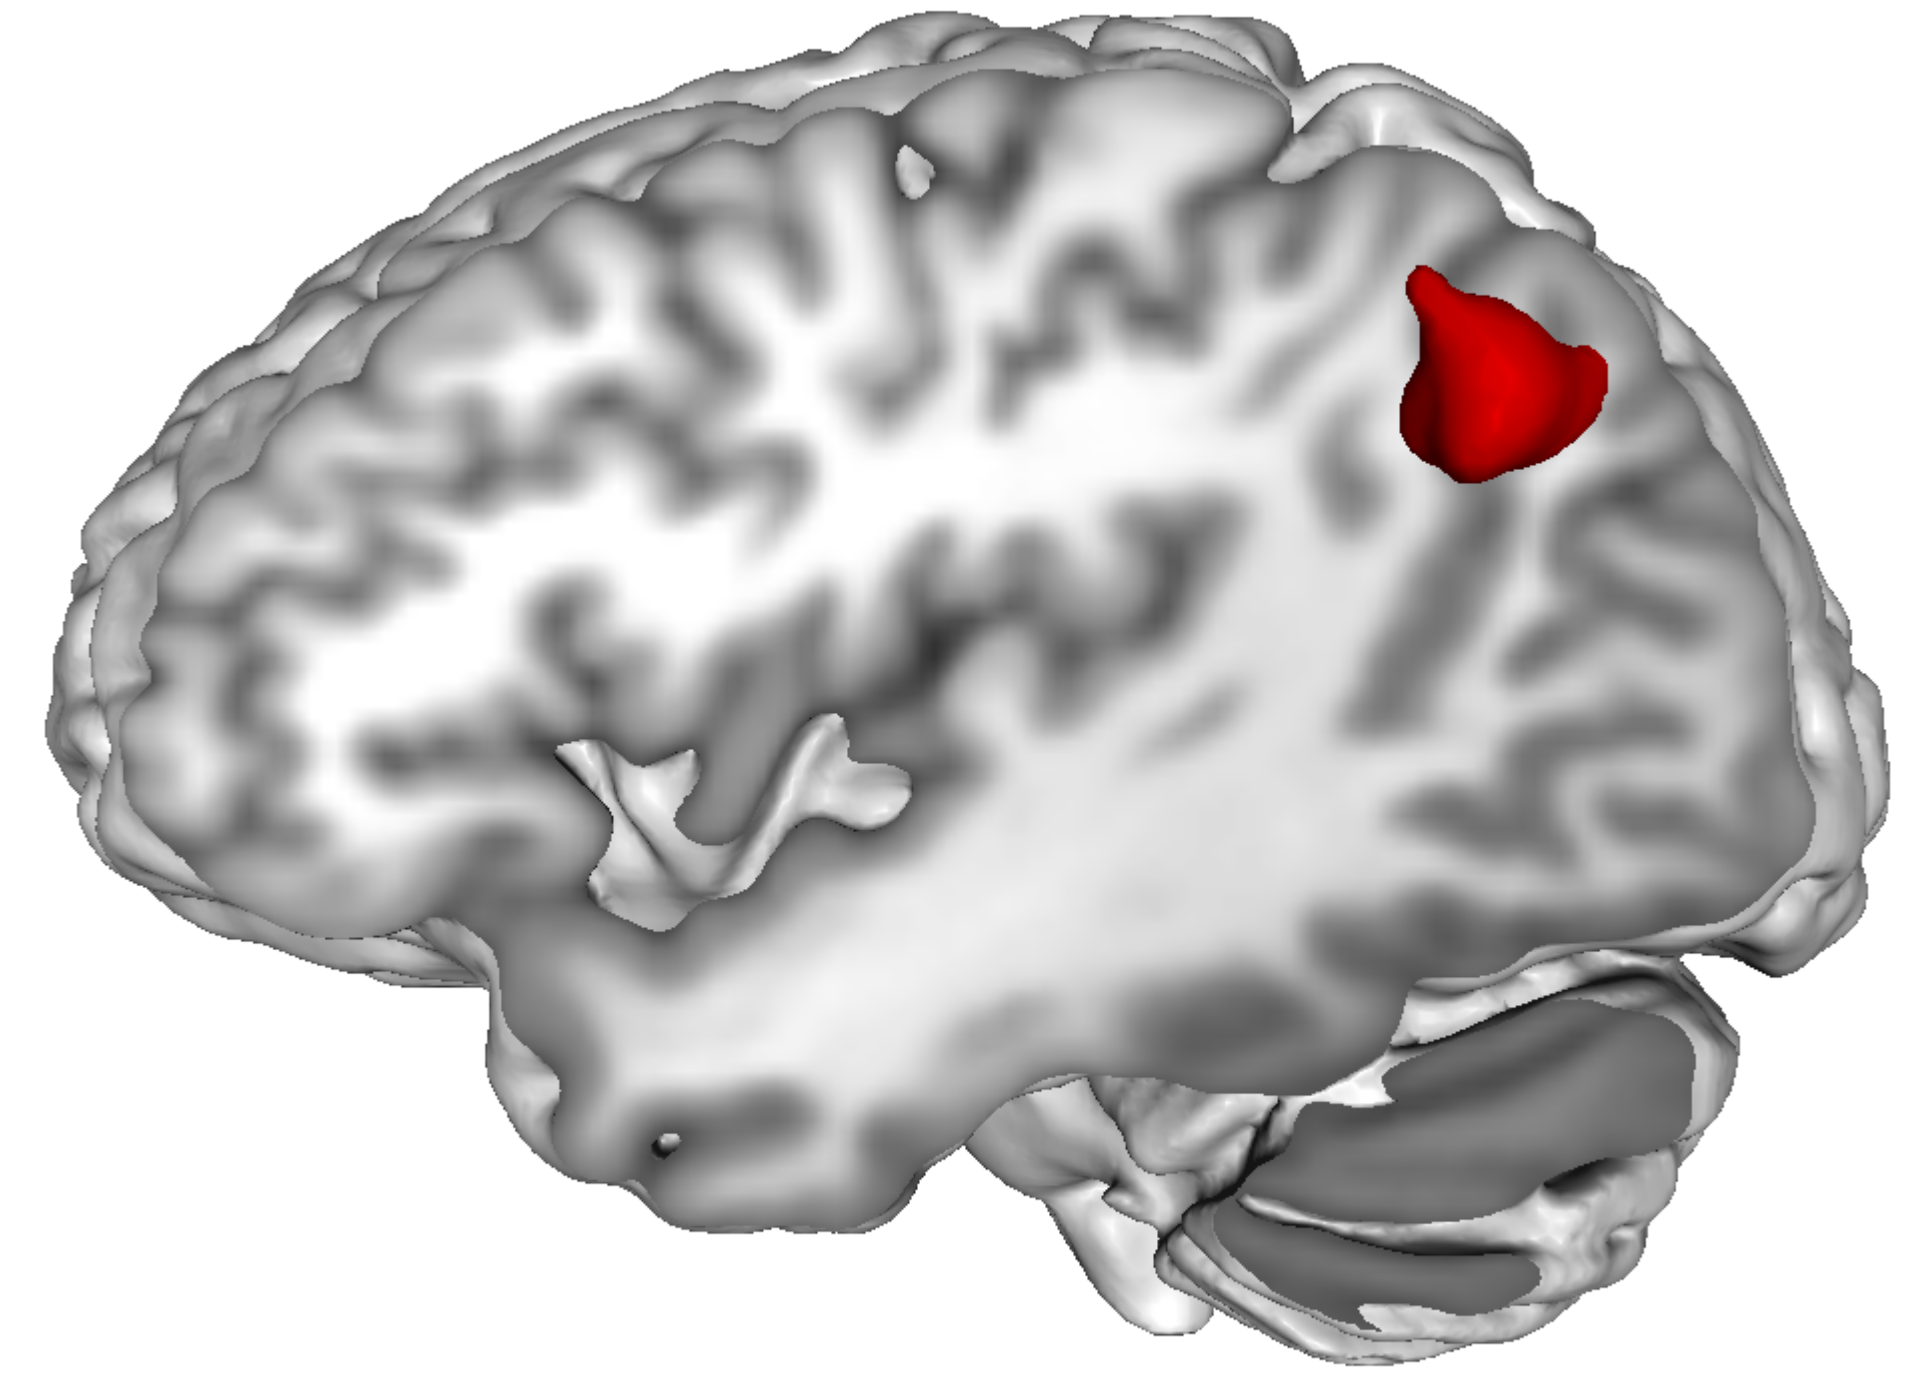

**B: FW > CON**

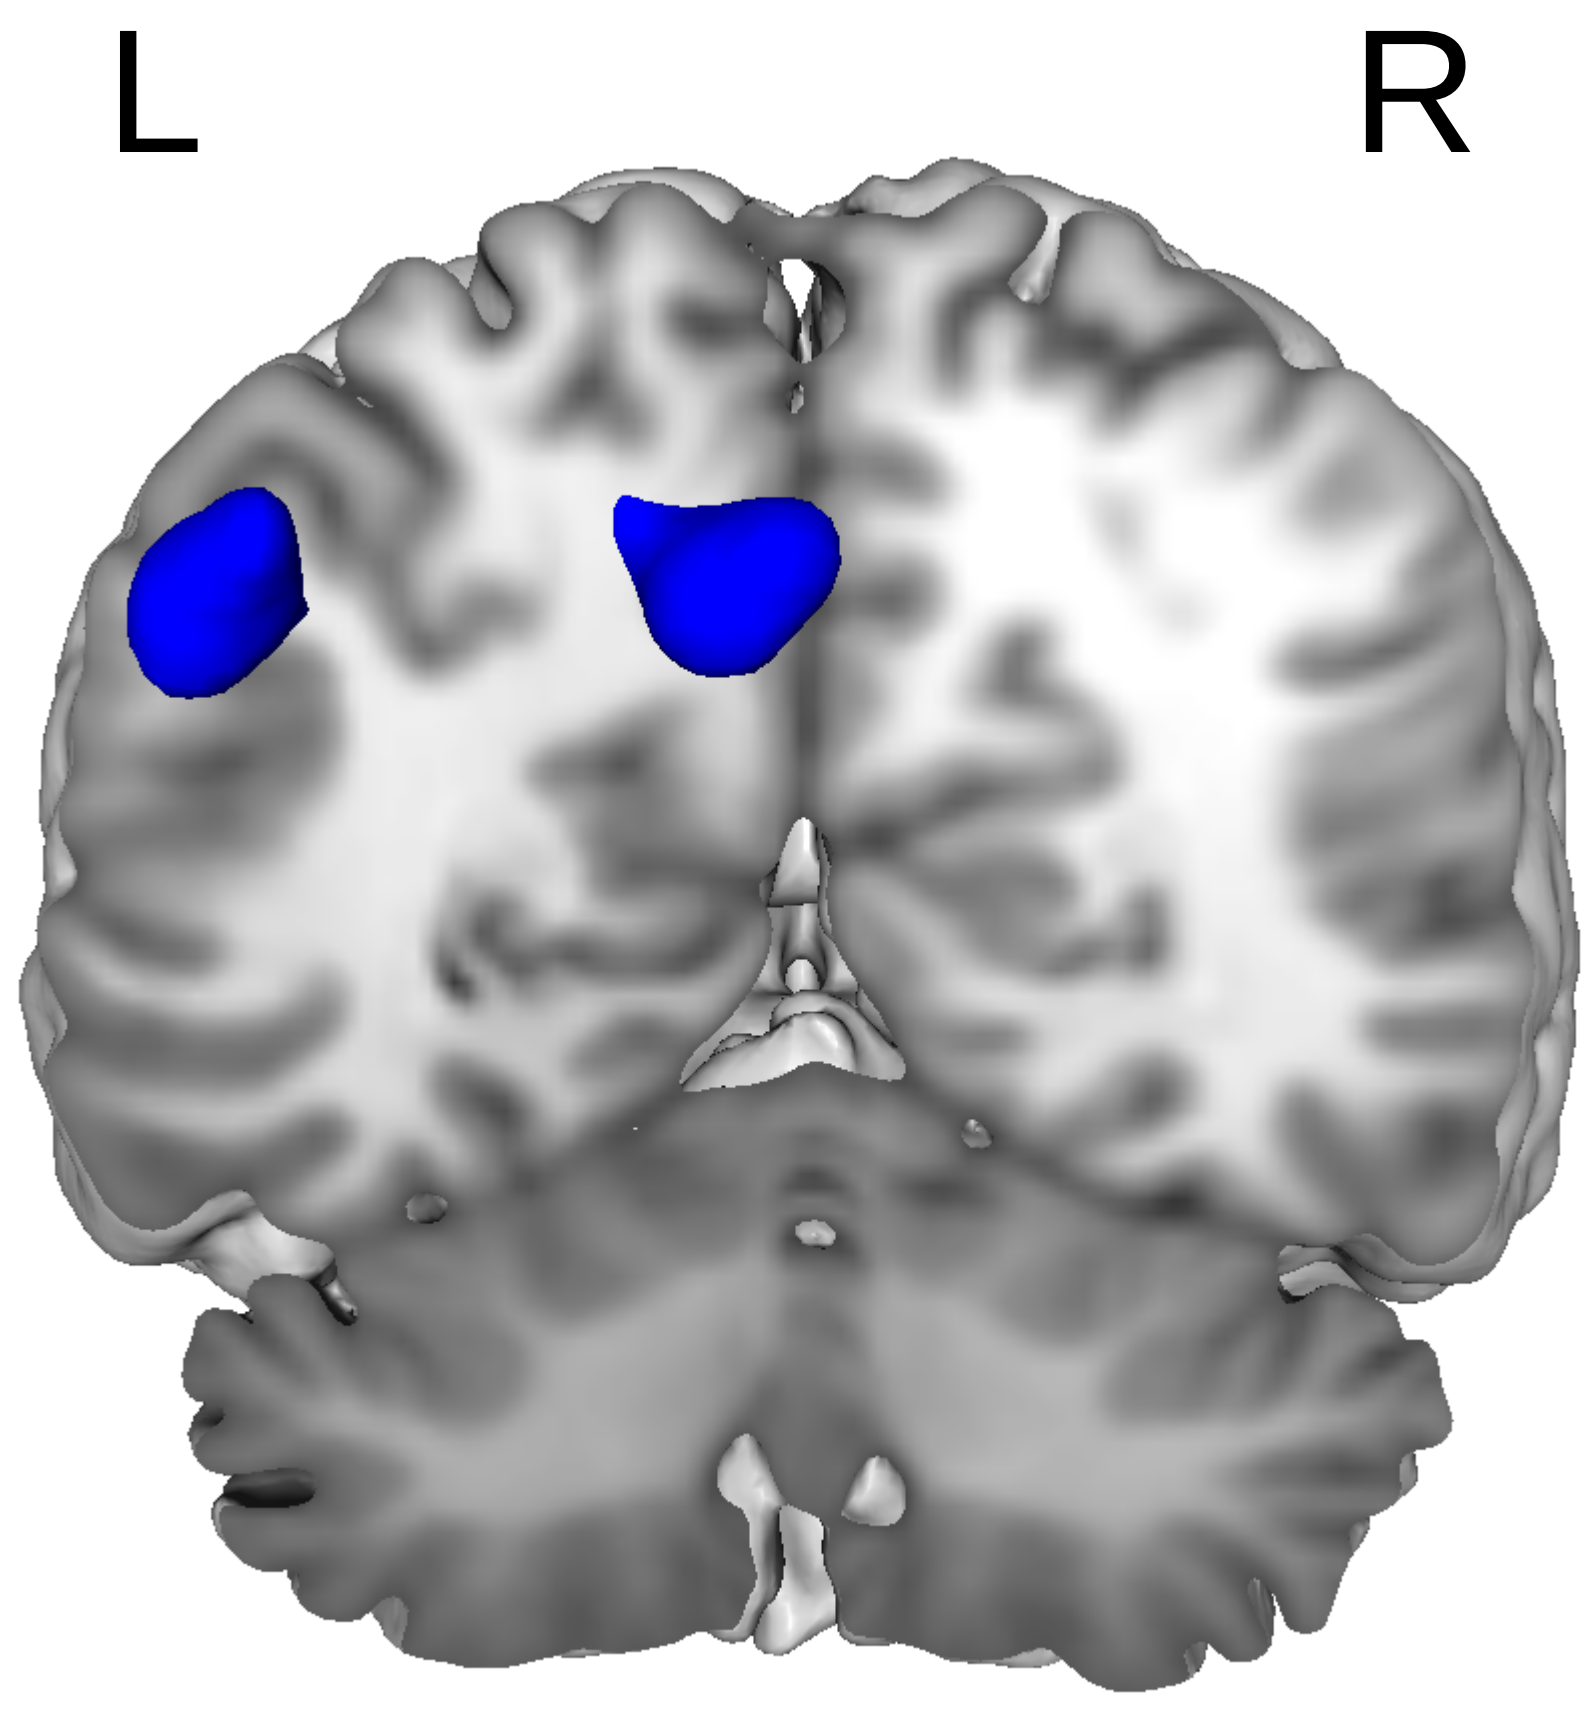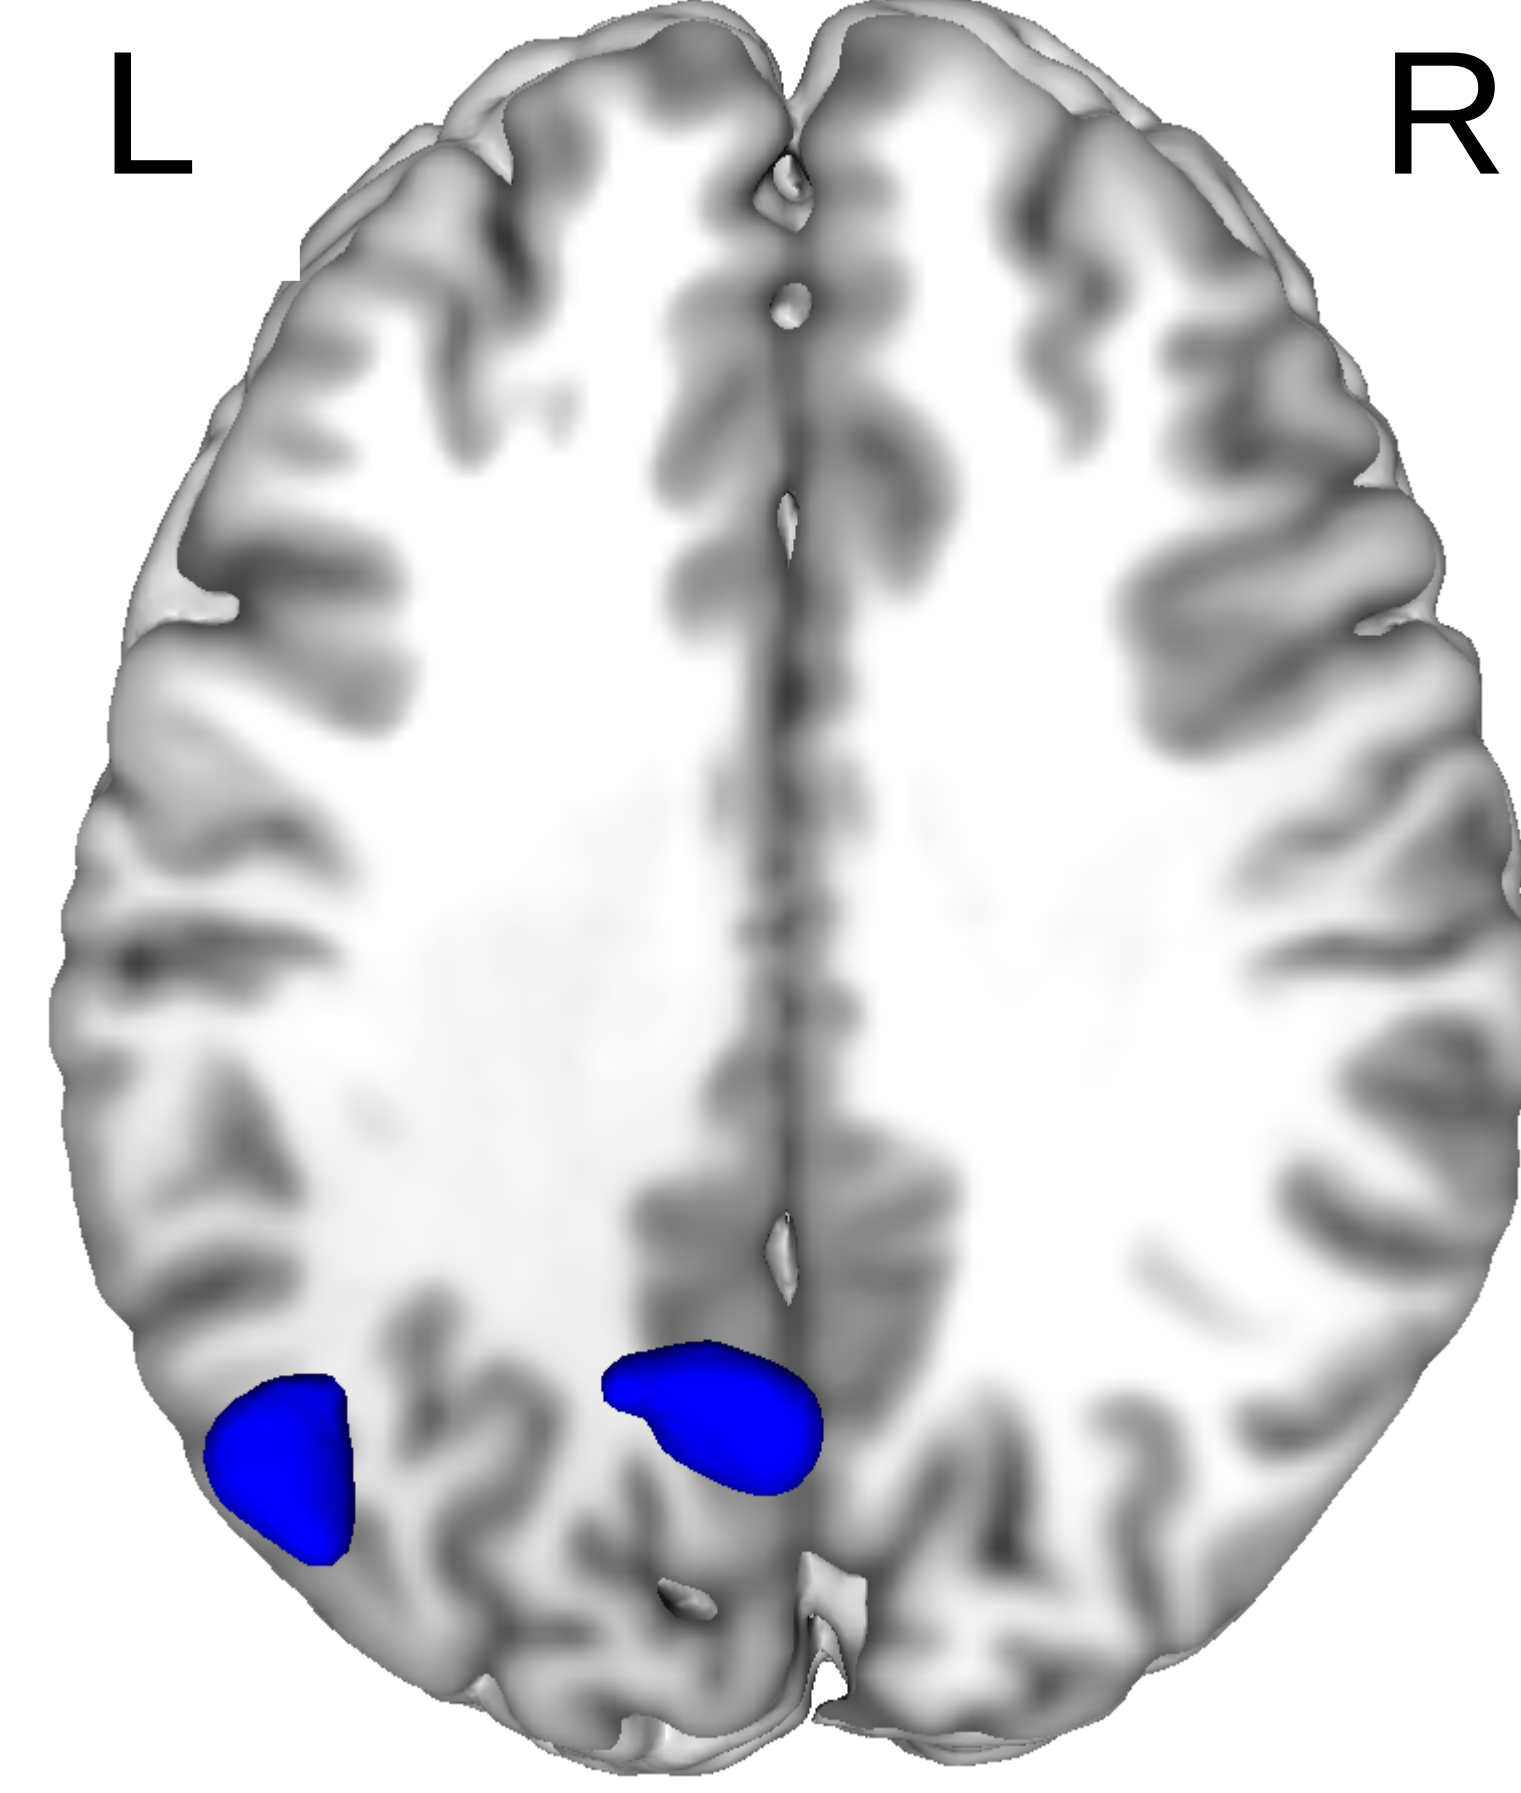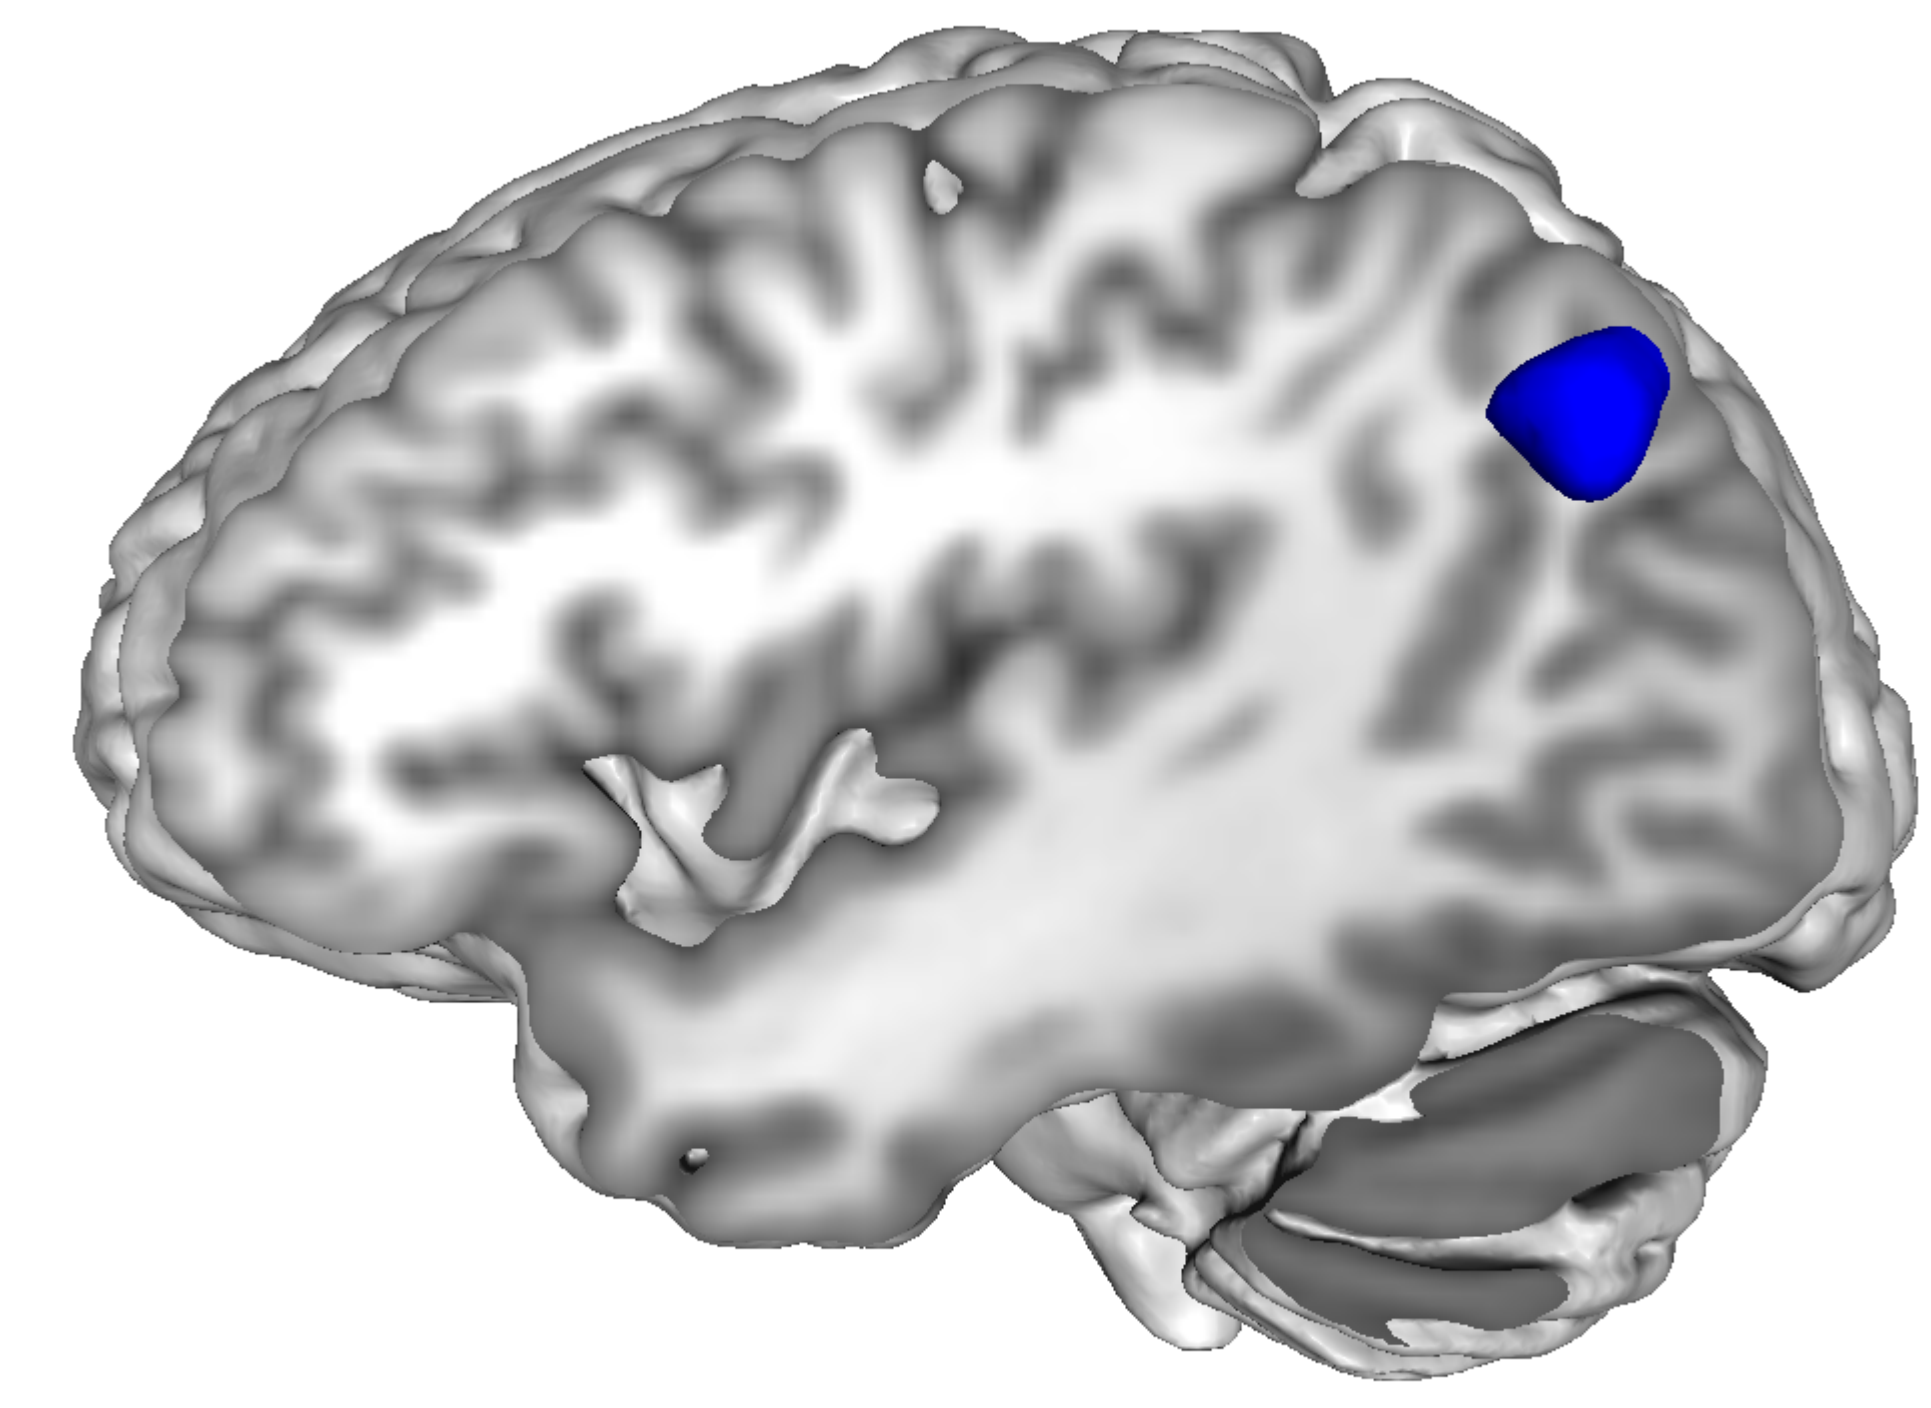

y = -58

z = 32

x = -42

**C: FW > no-FW+**

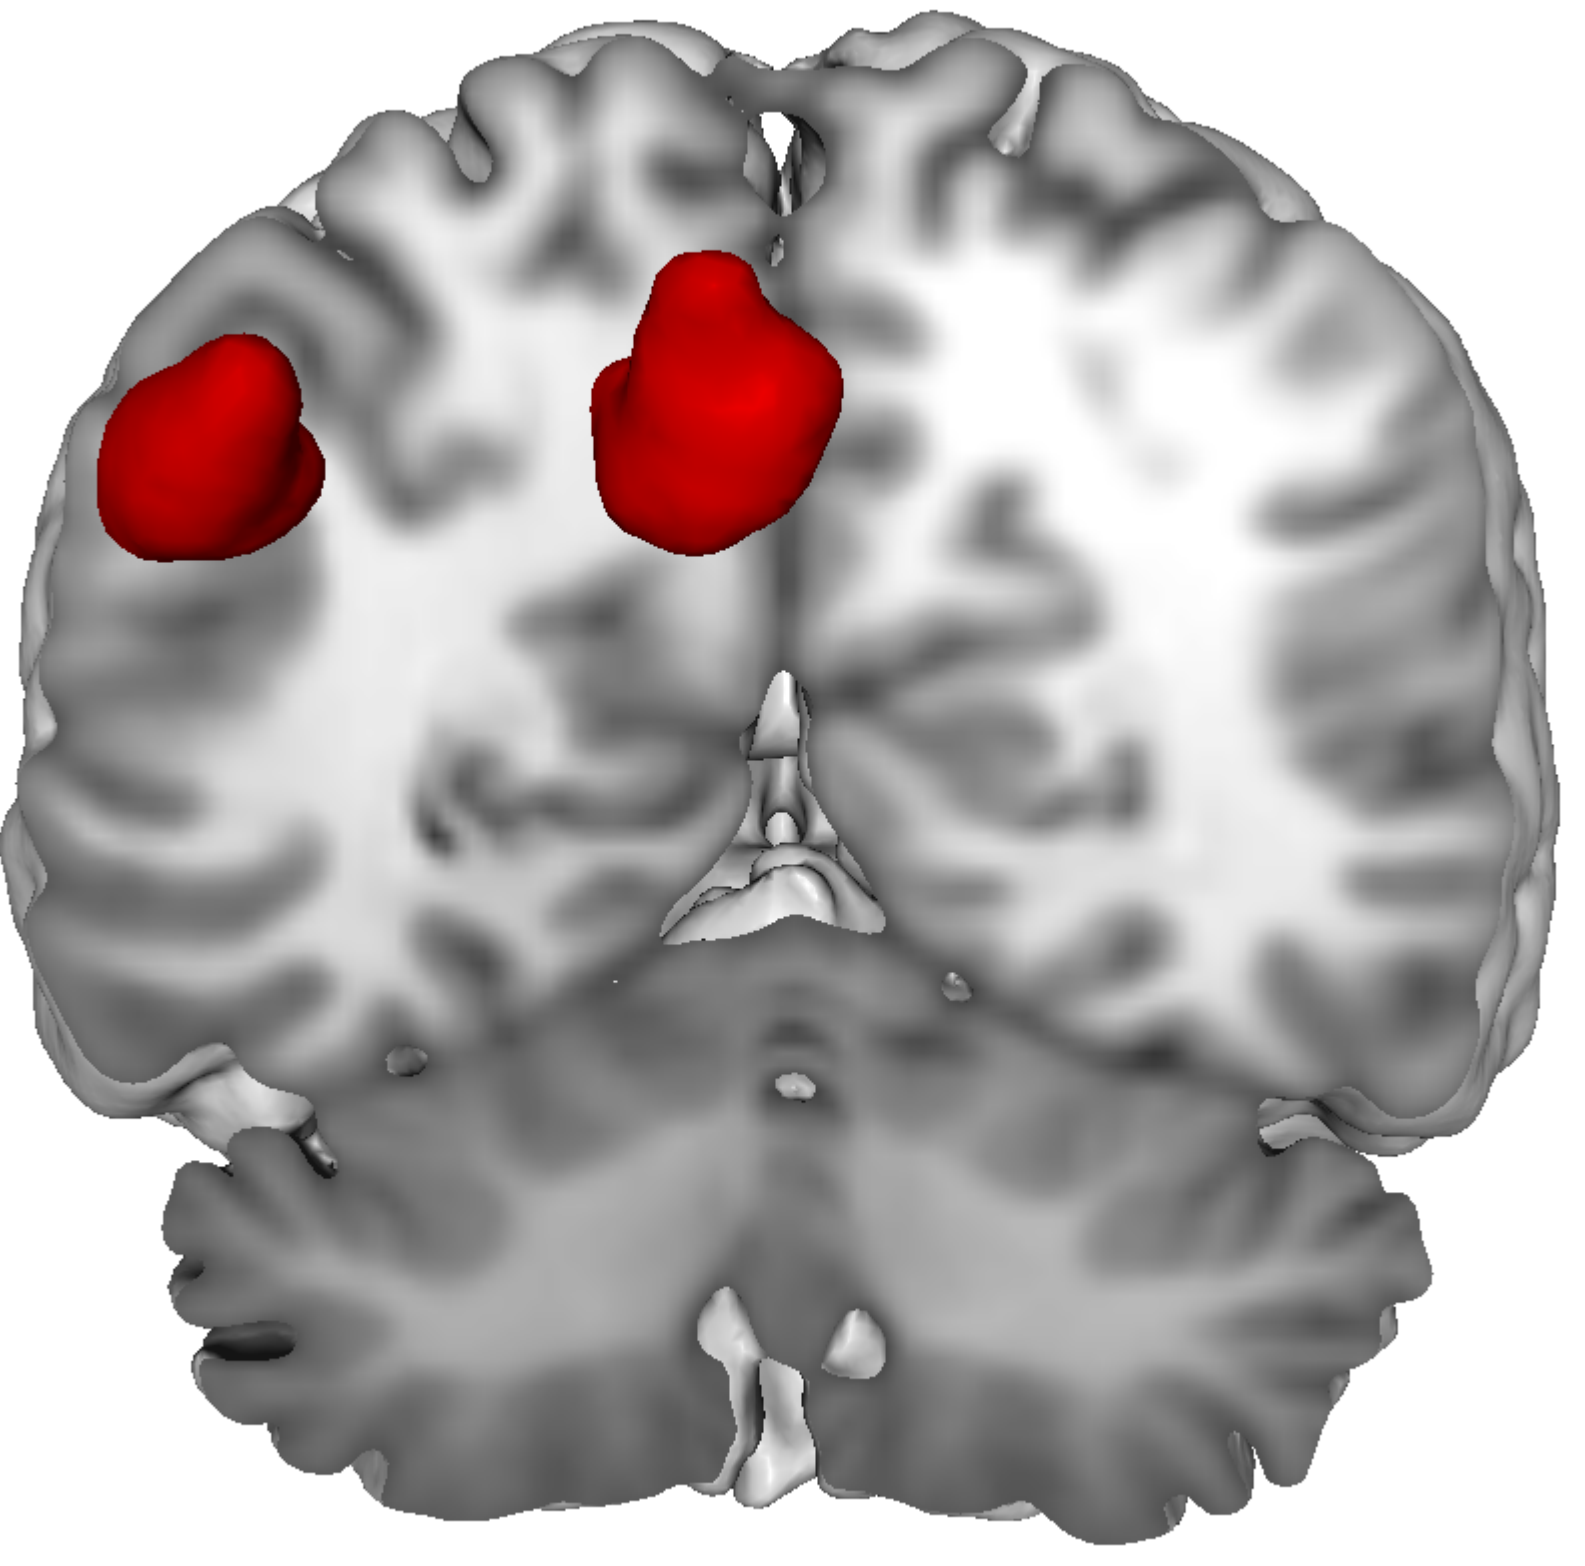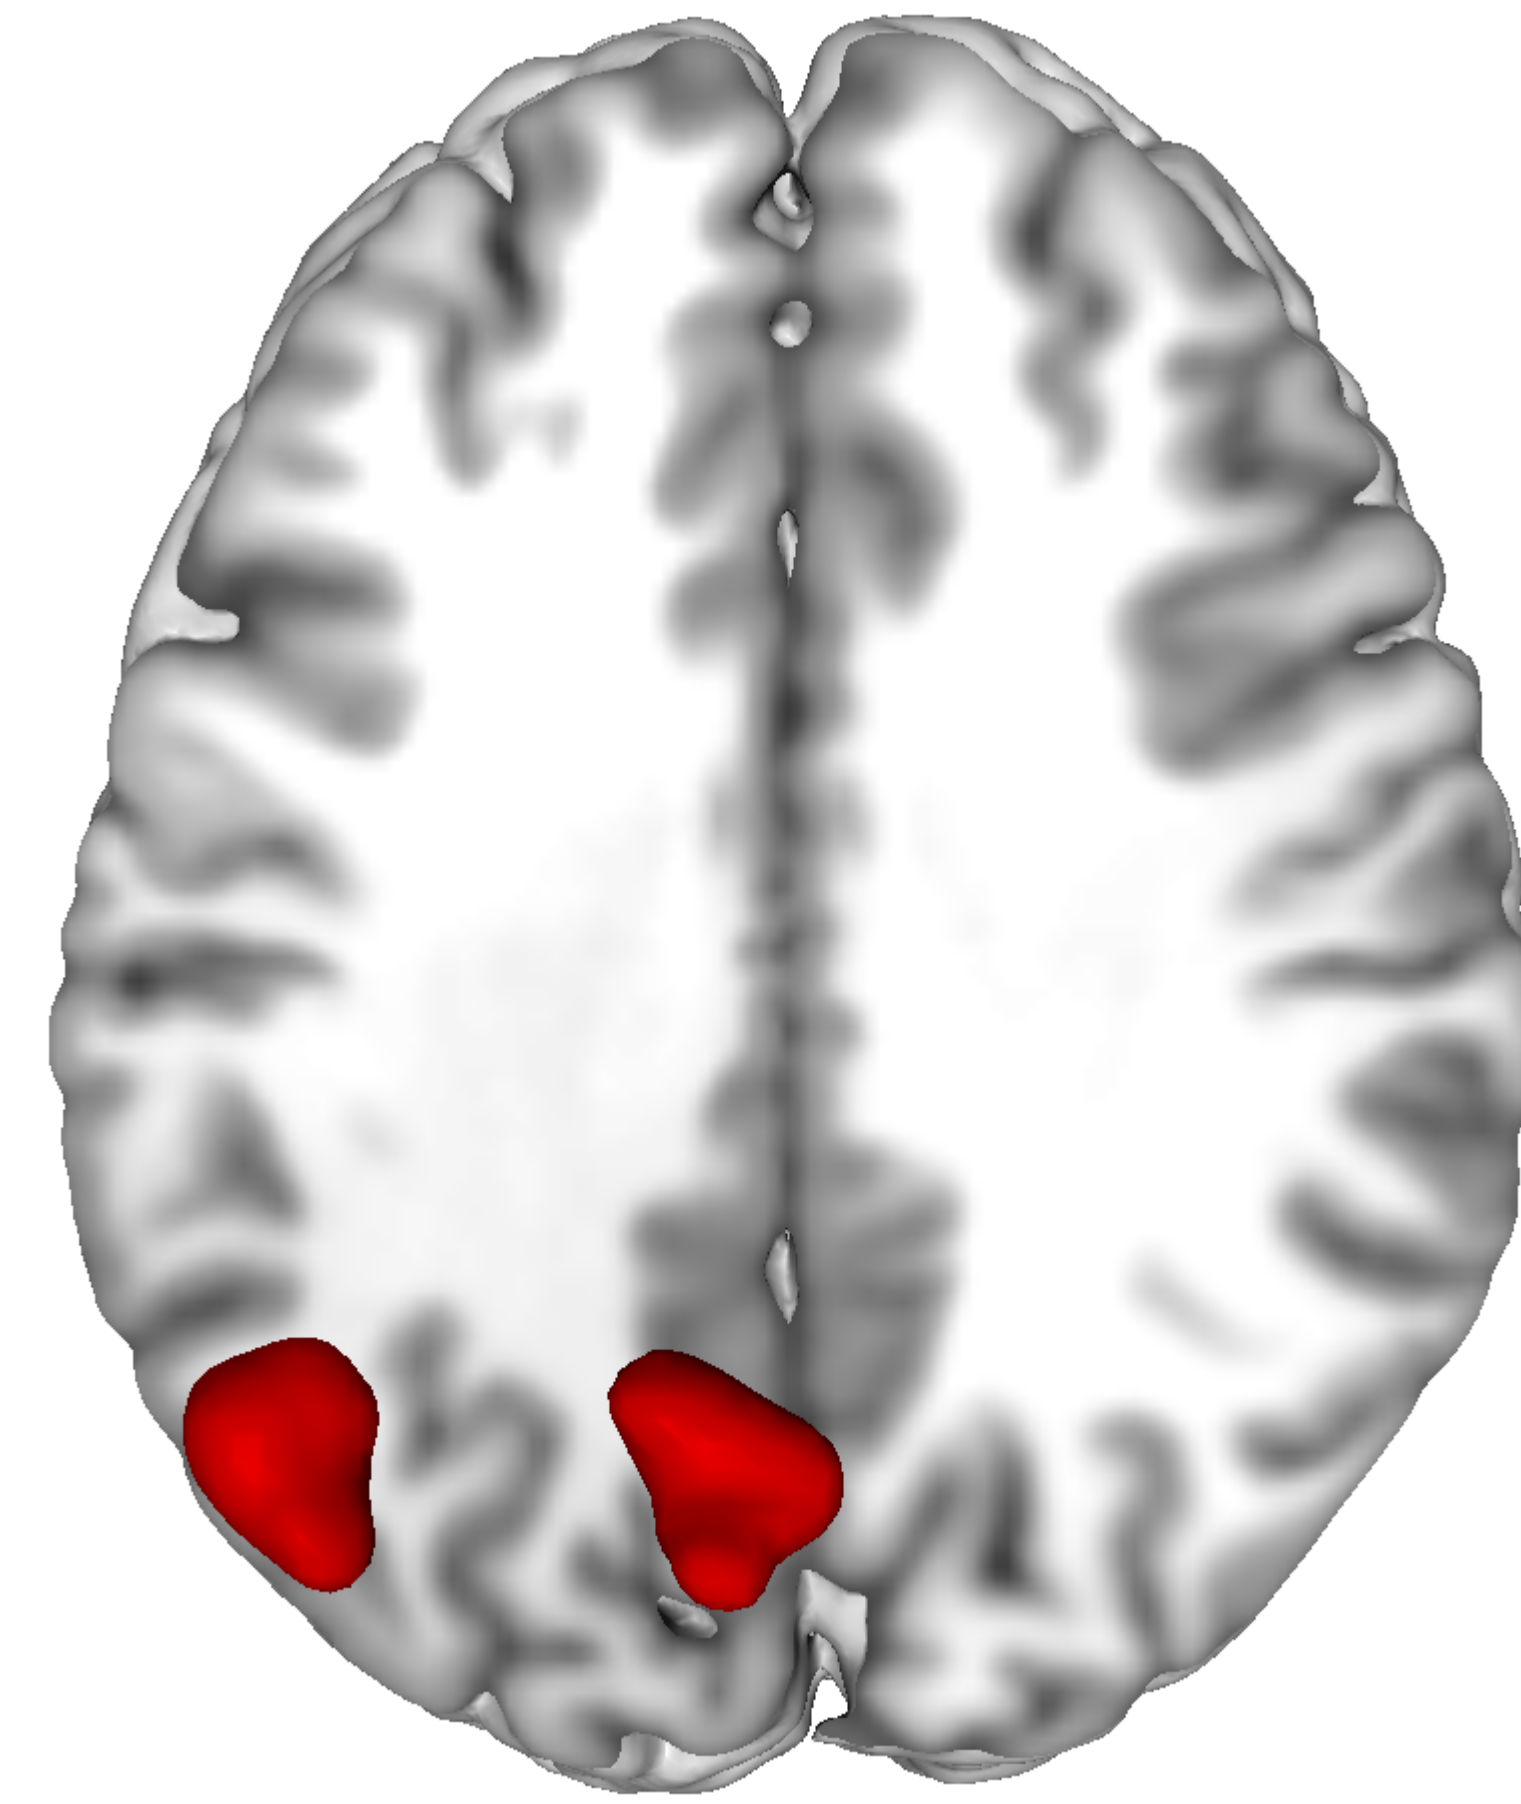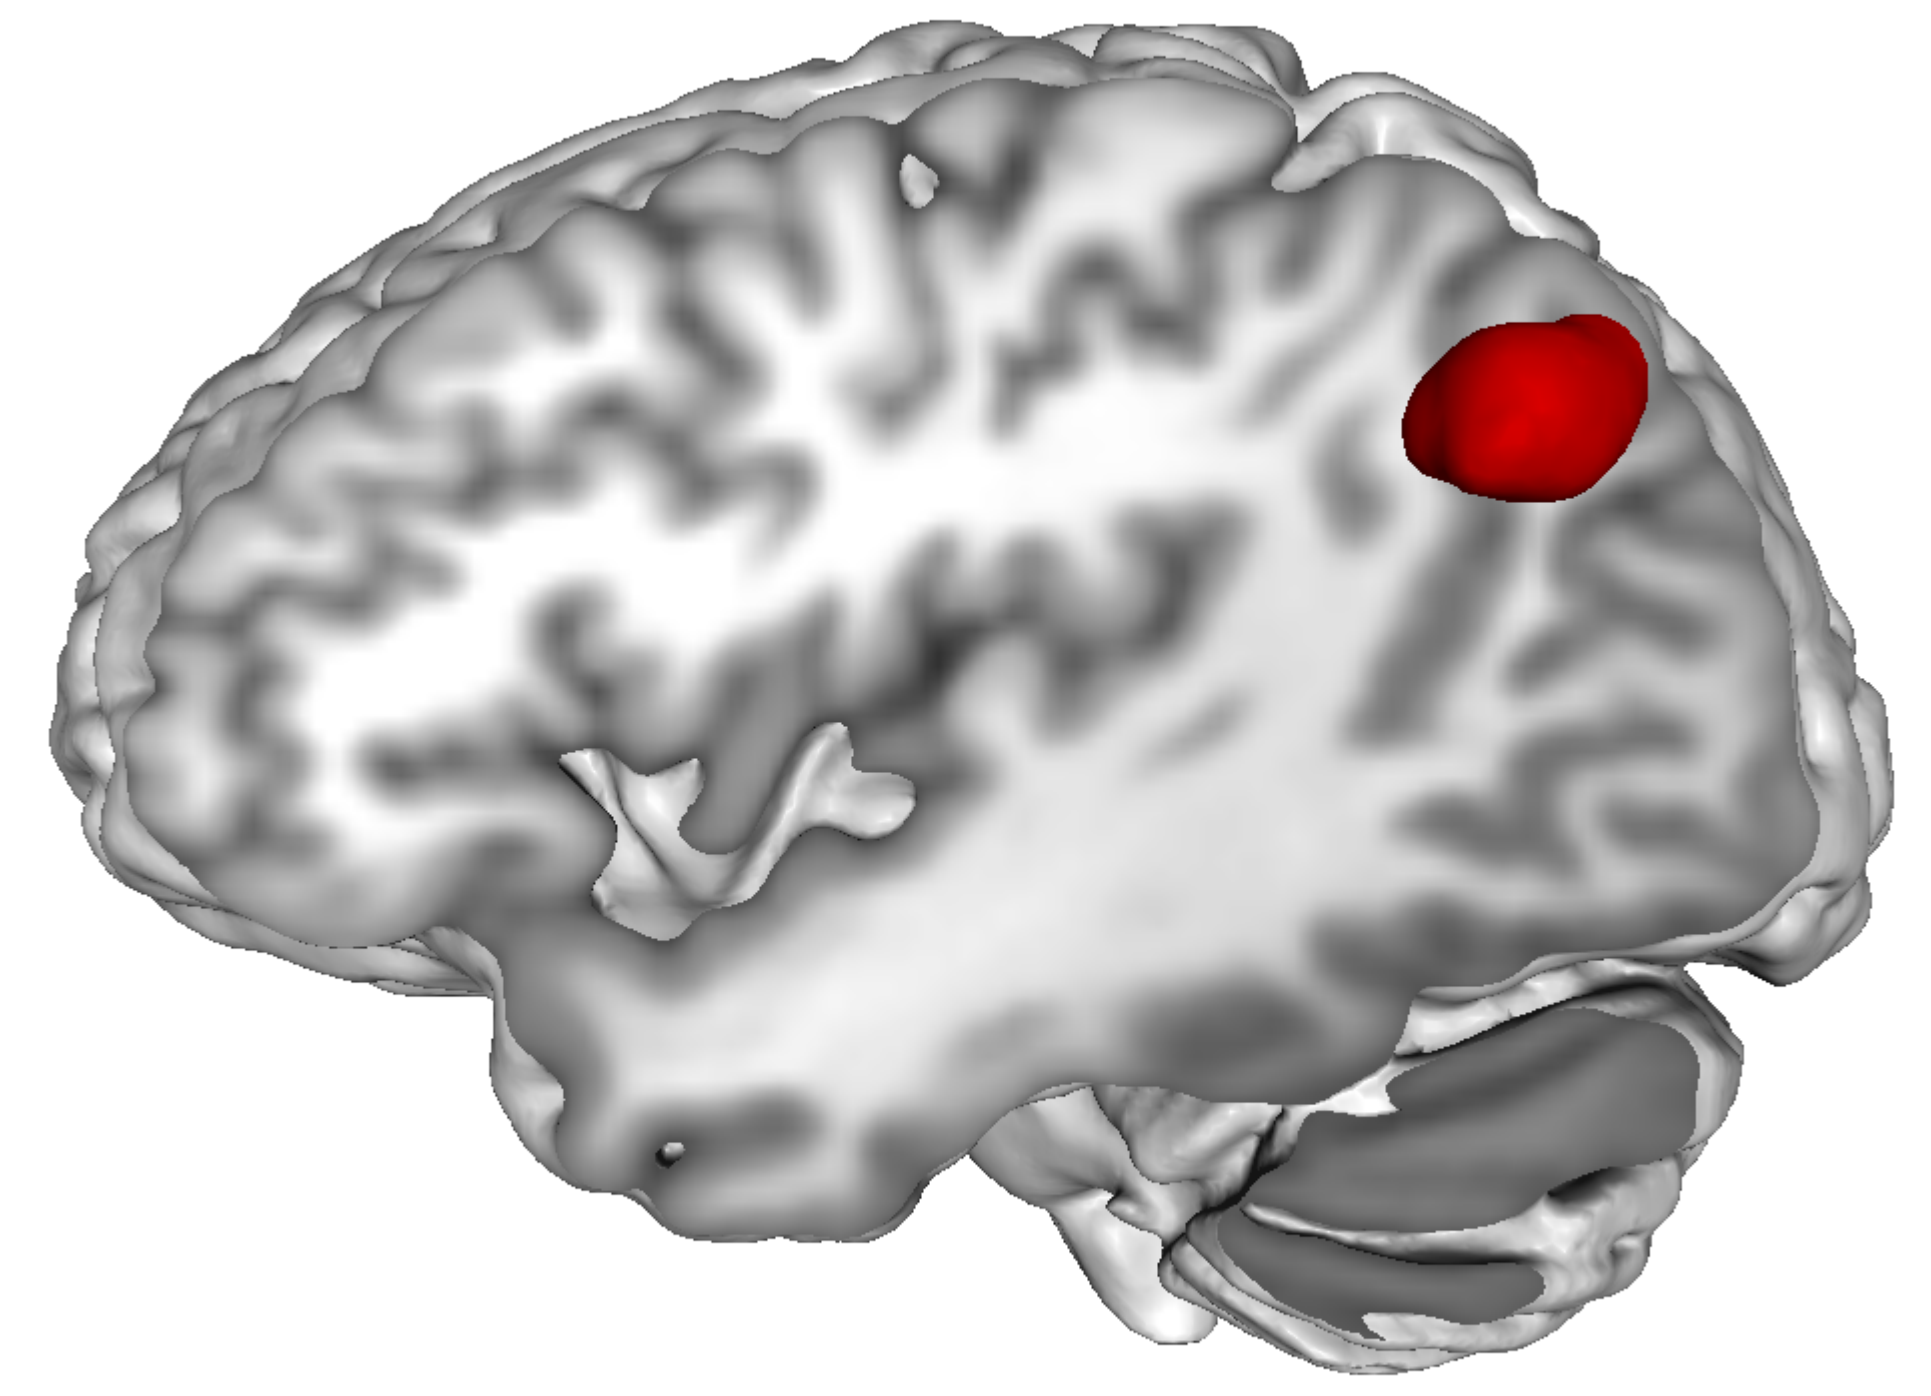

■ GCOR, P < 0.05 FWE

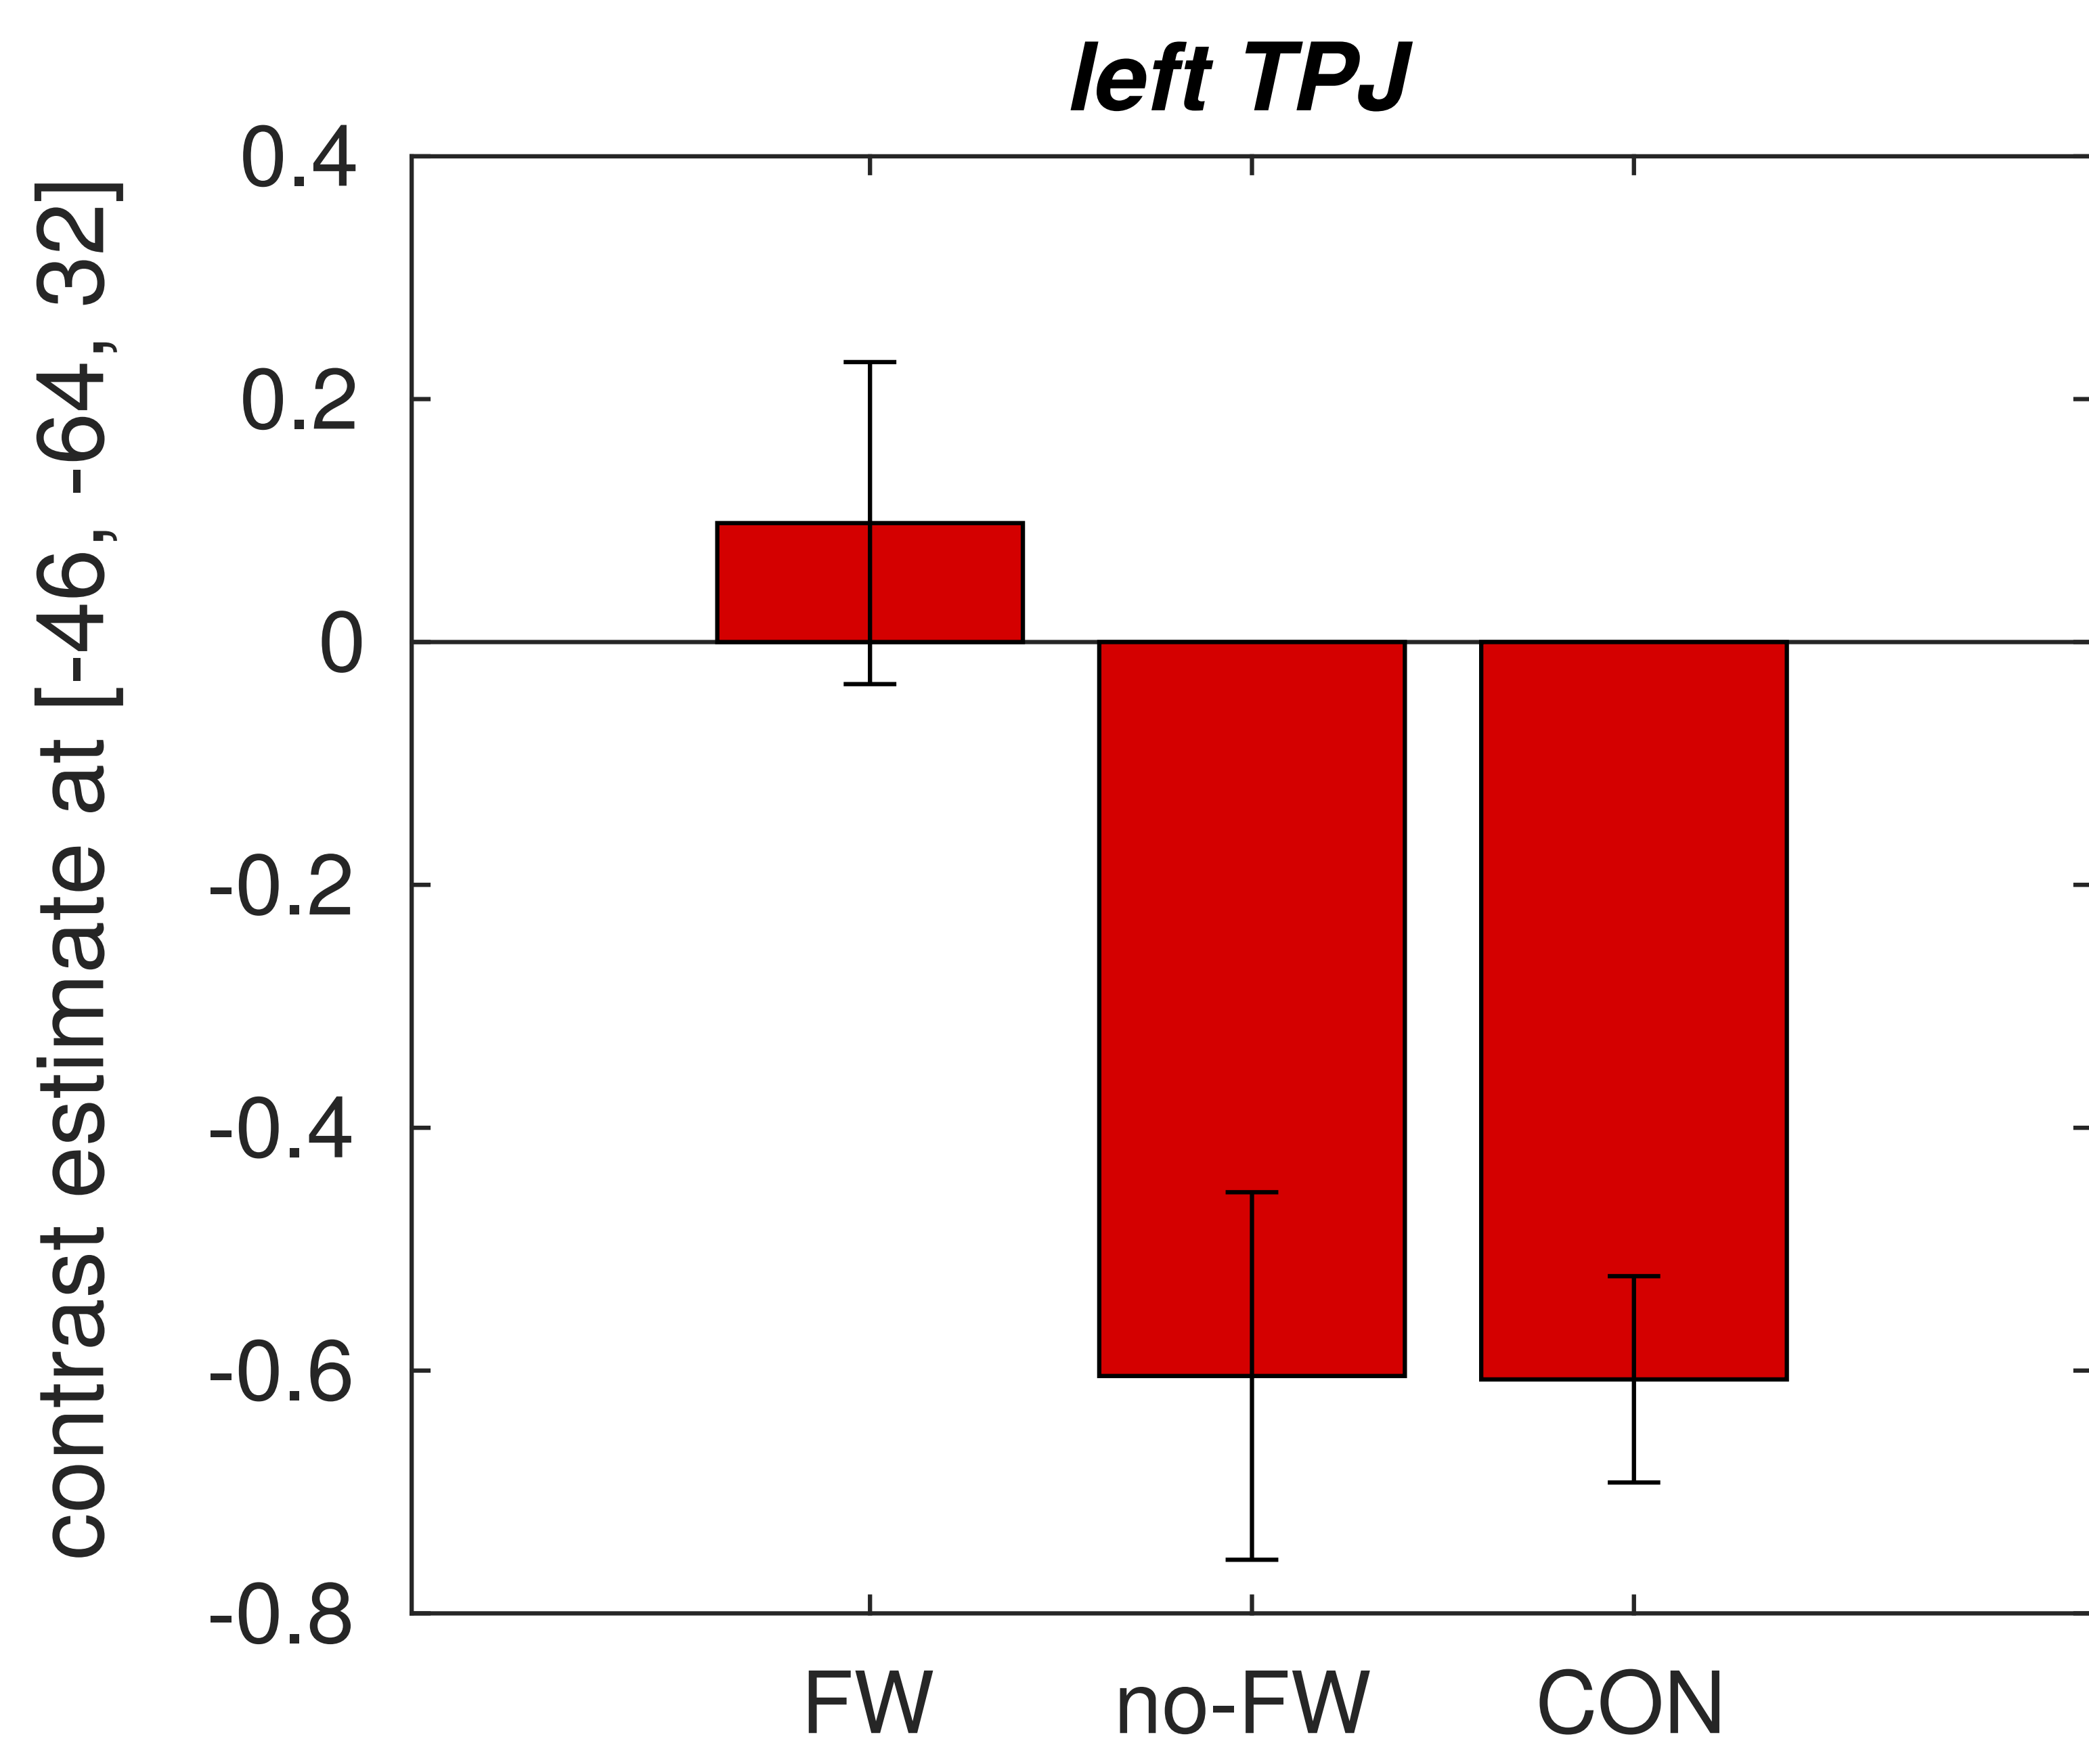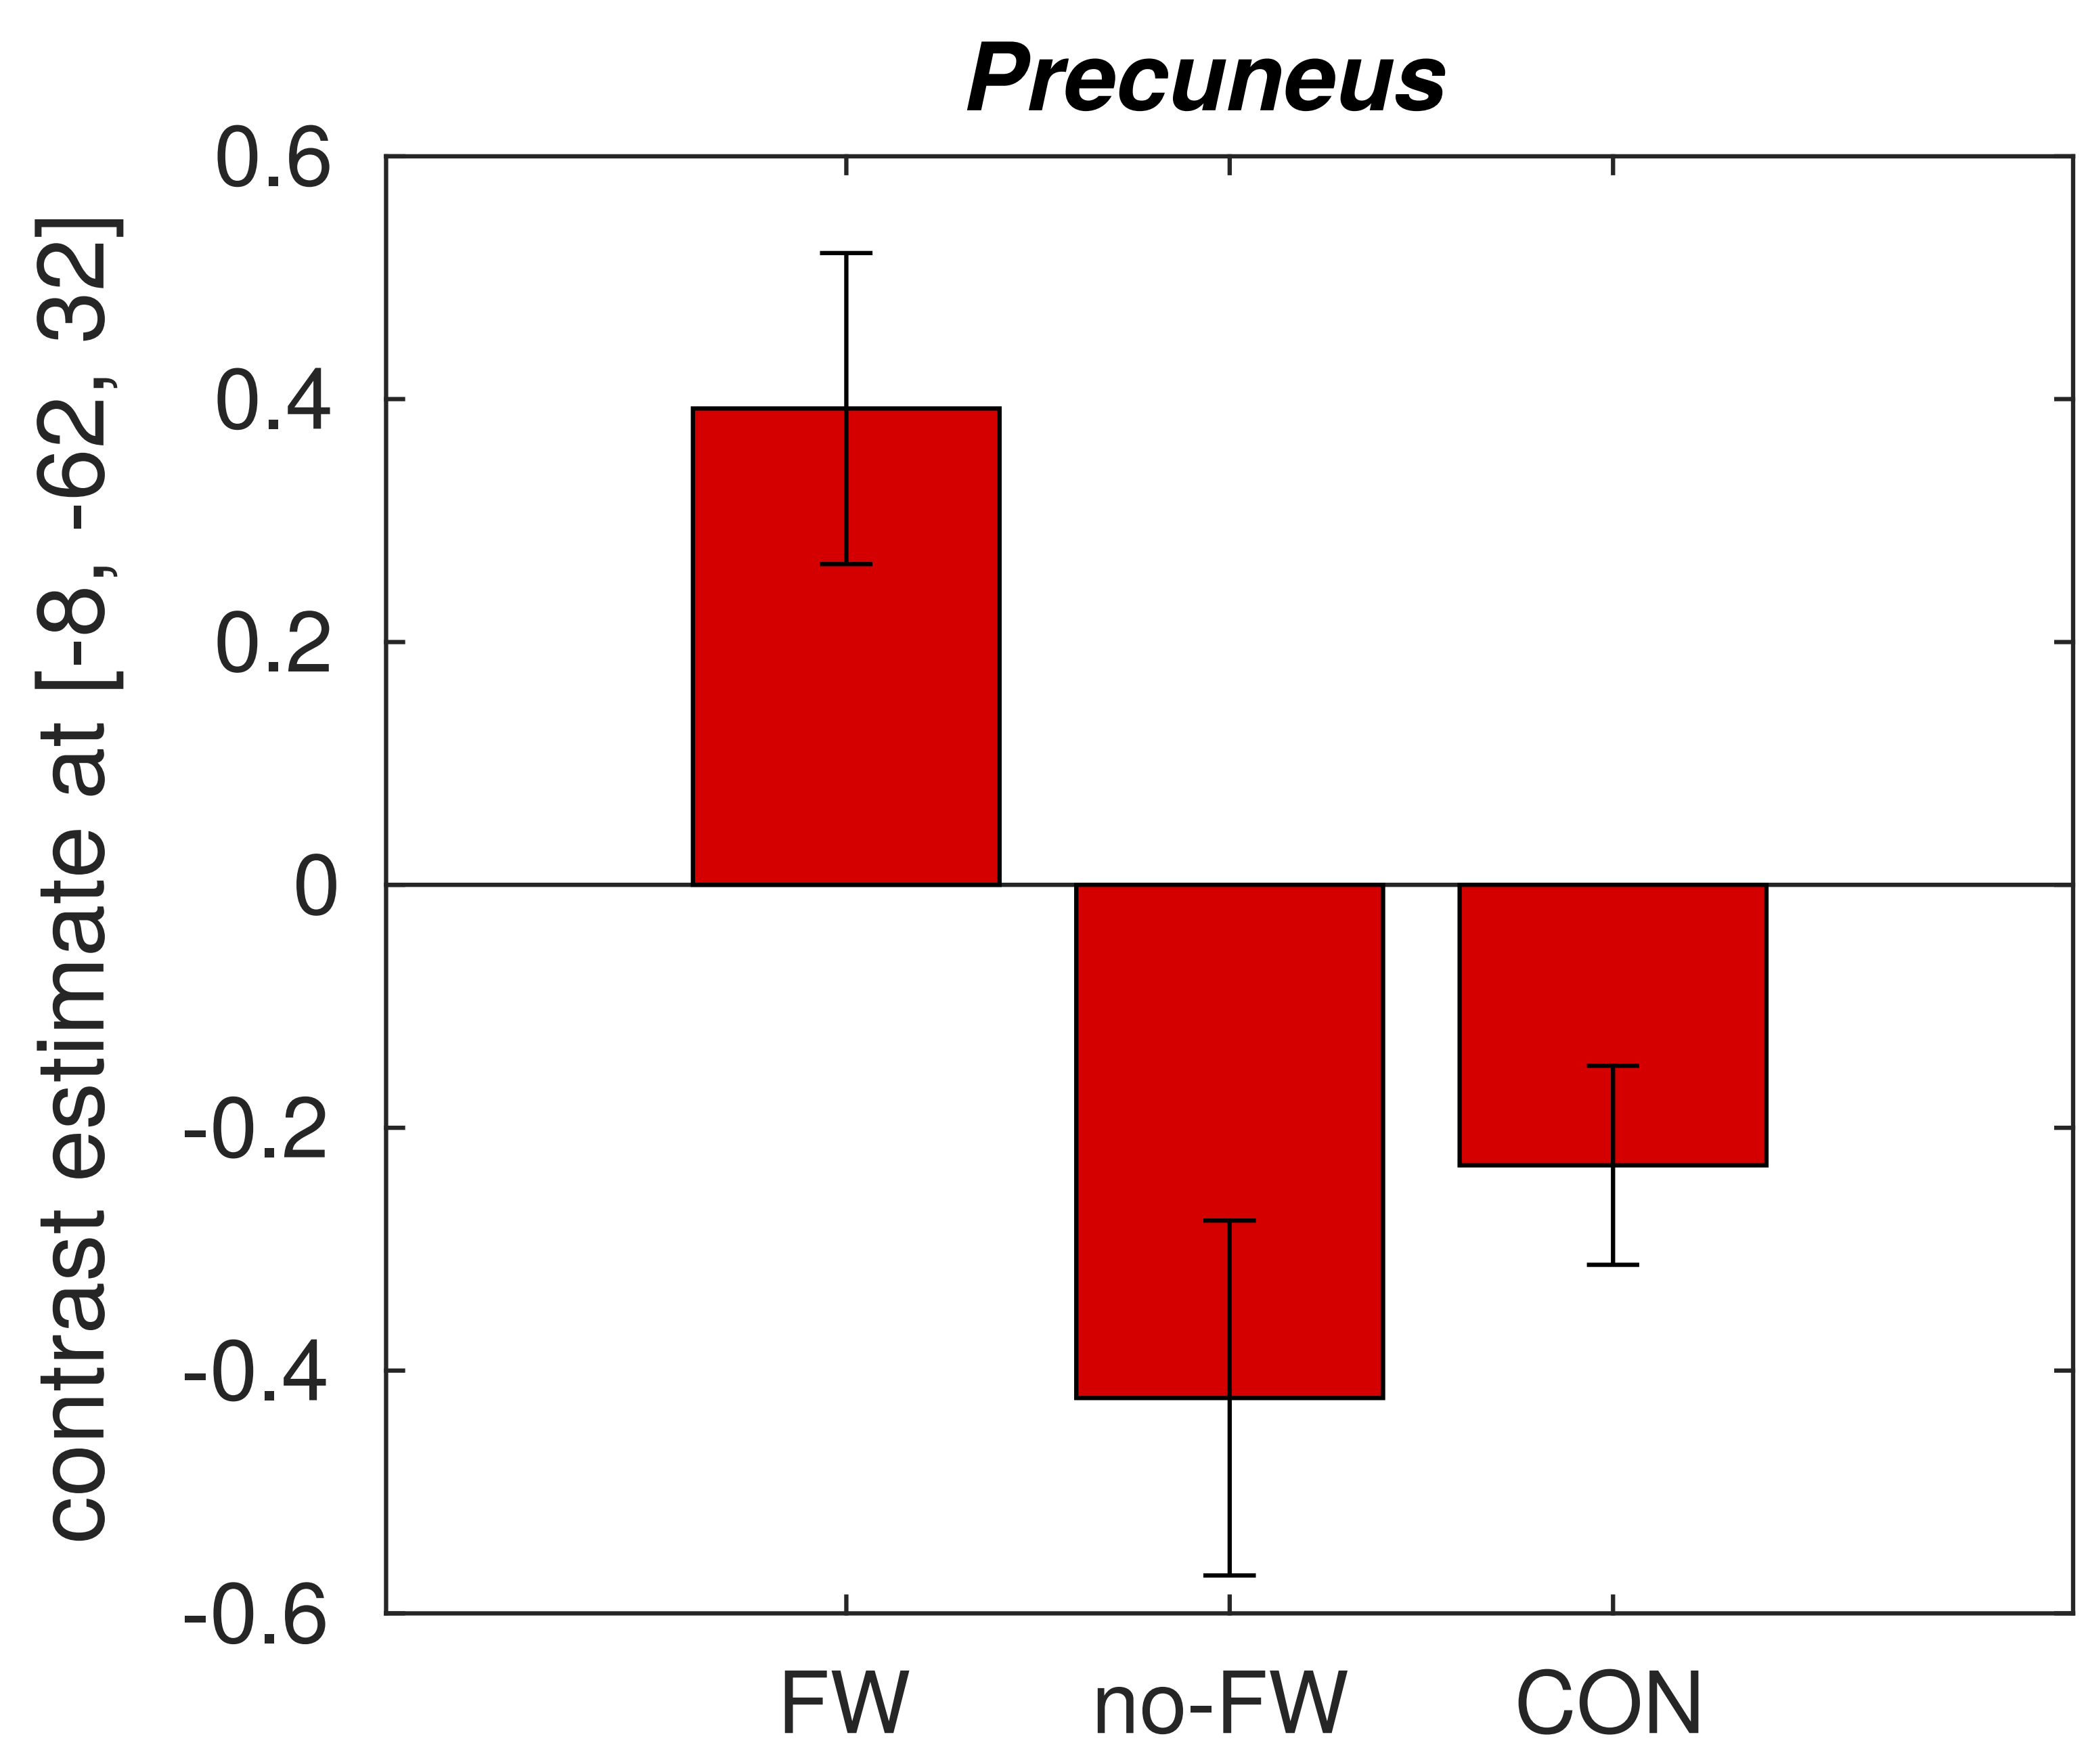

Supplement: mmc1.pdf [file mmc1.pdf]
