# Supplementary material for: Symptom-severity-related brain connectivity alterations in functional movement disorders
Source: PubMed Central journal article supplement (PMC8921488; doi:10.1016/j.nicl.2022.102981), 2022-03-03

no-FW < CON

**A: GCOR**

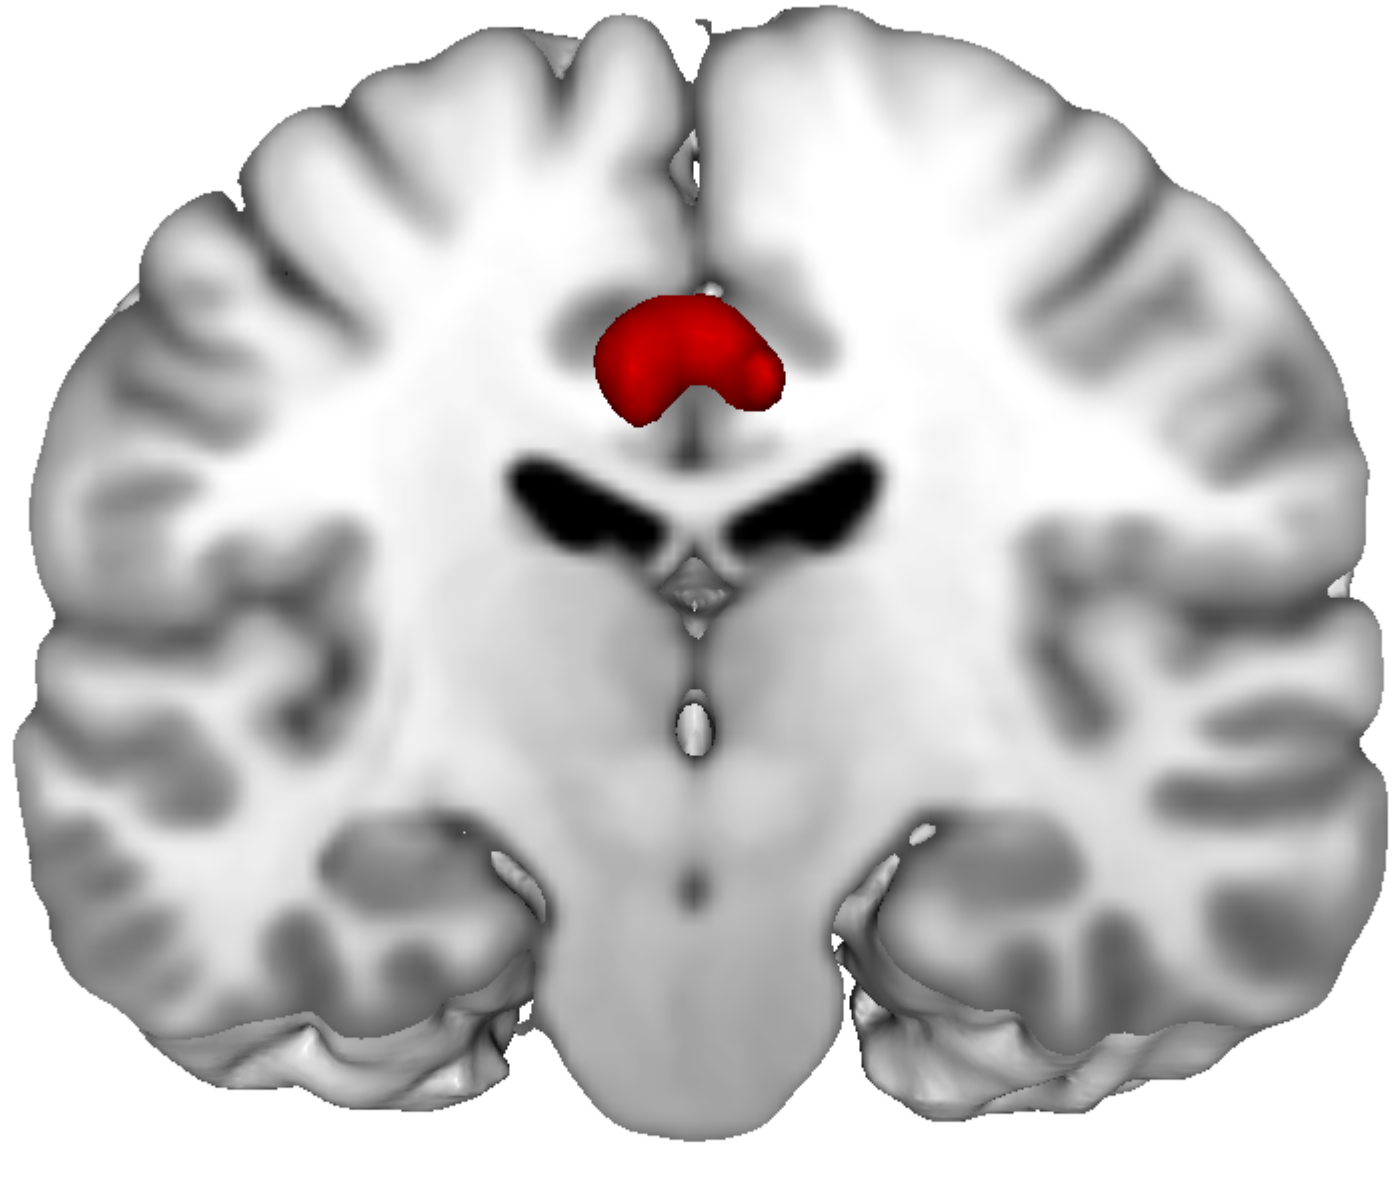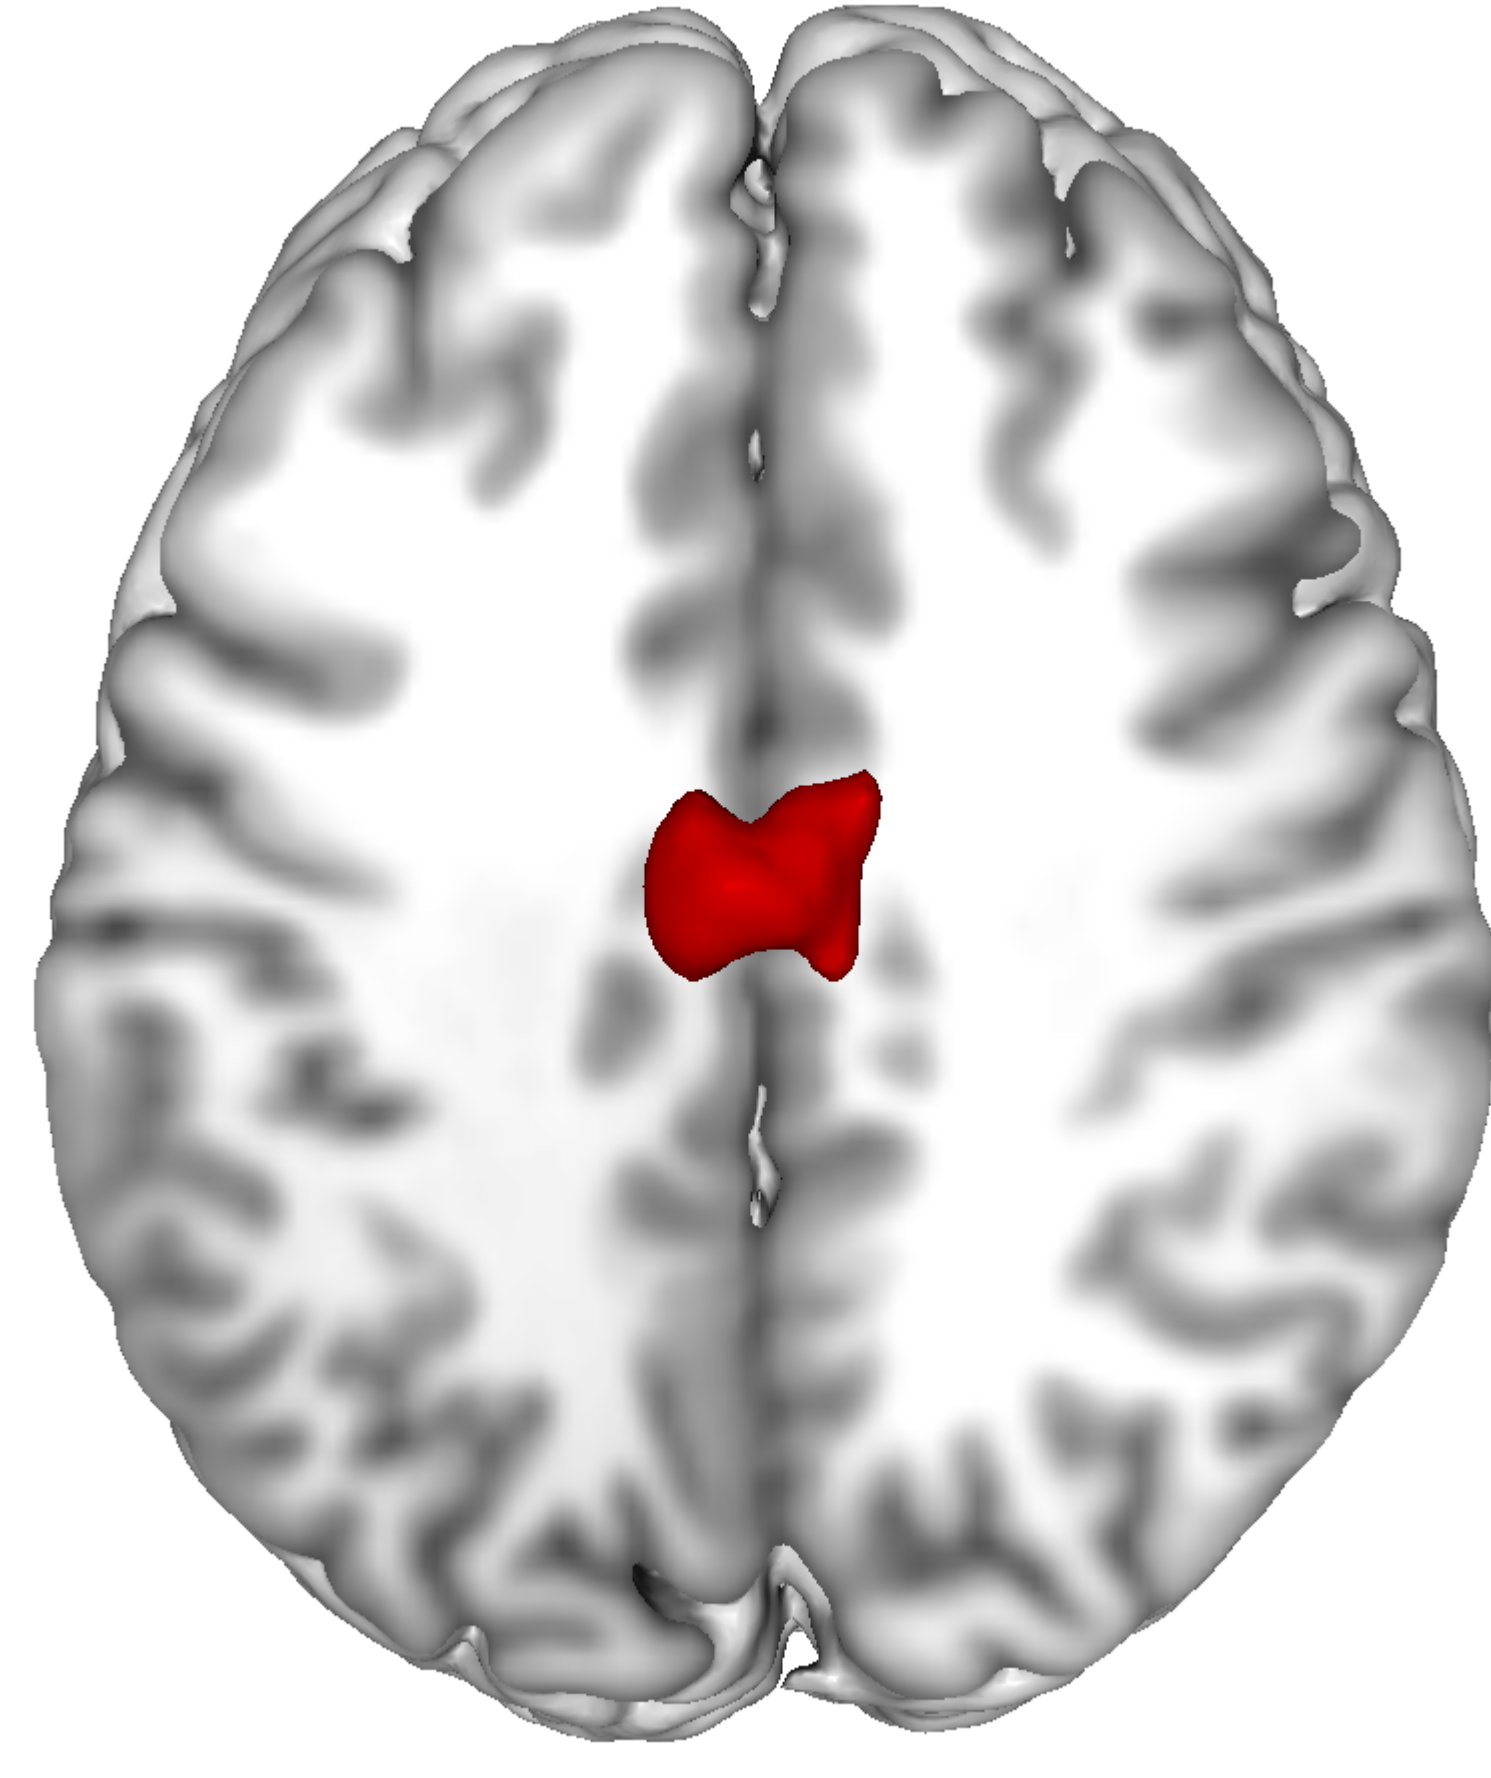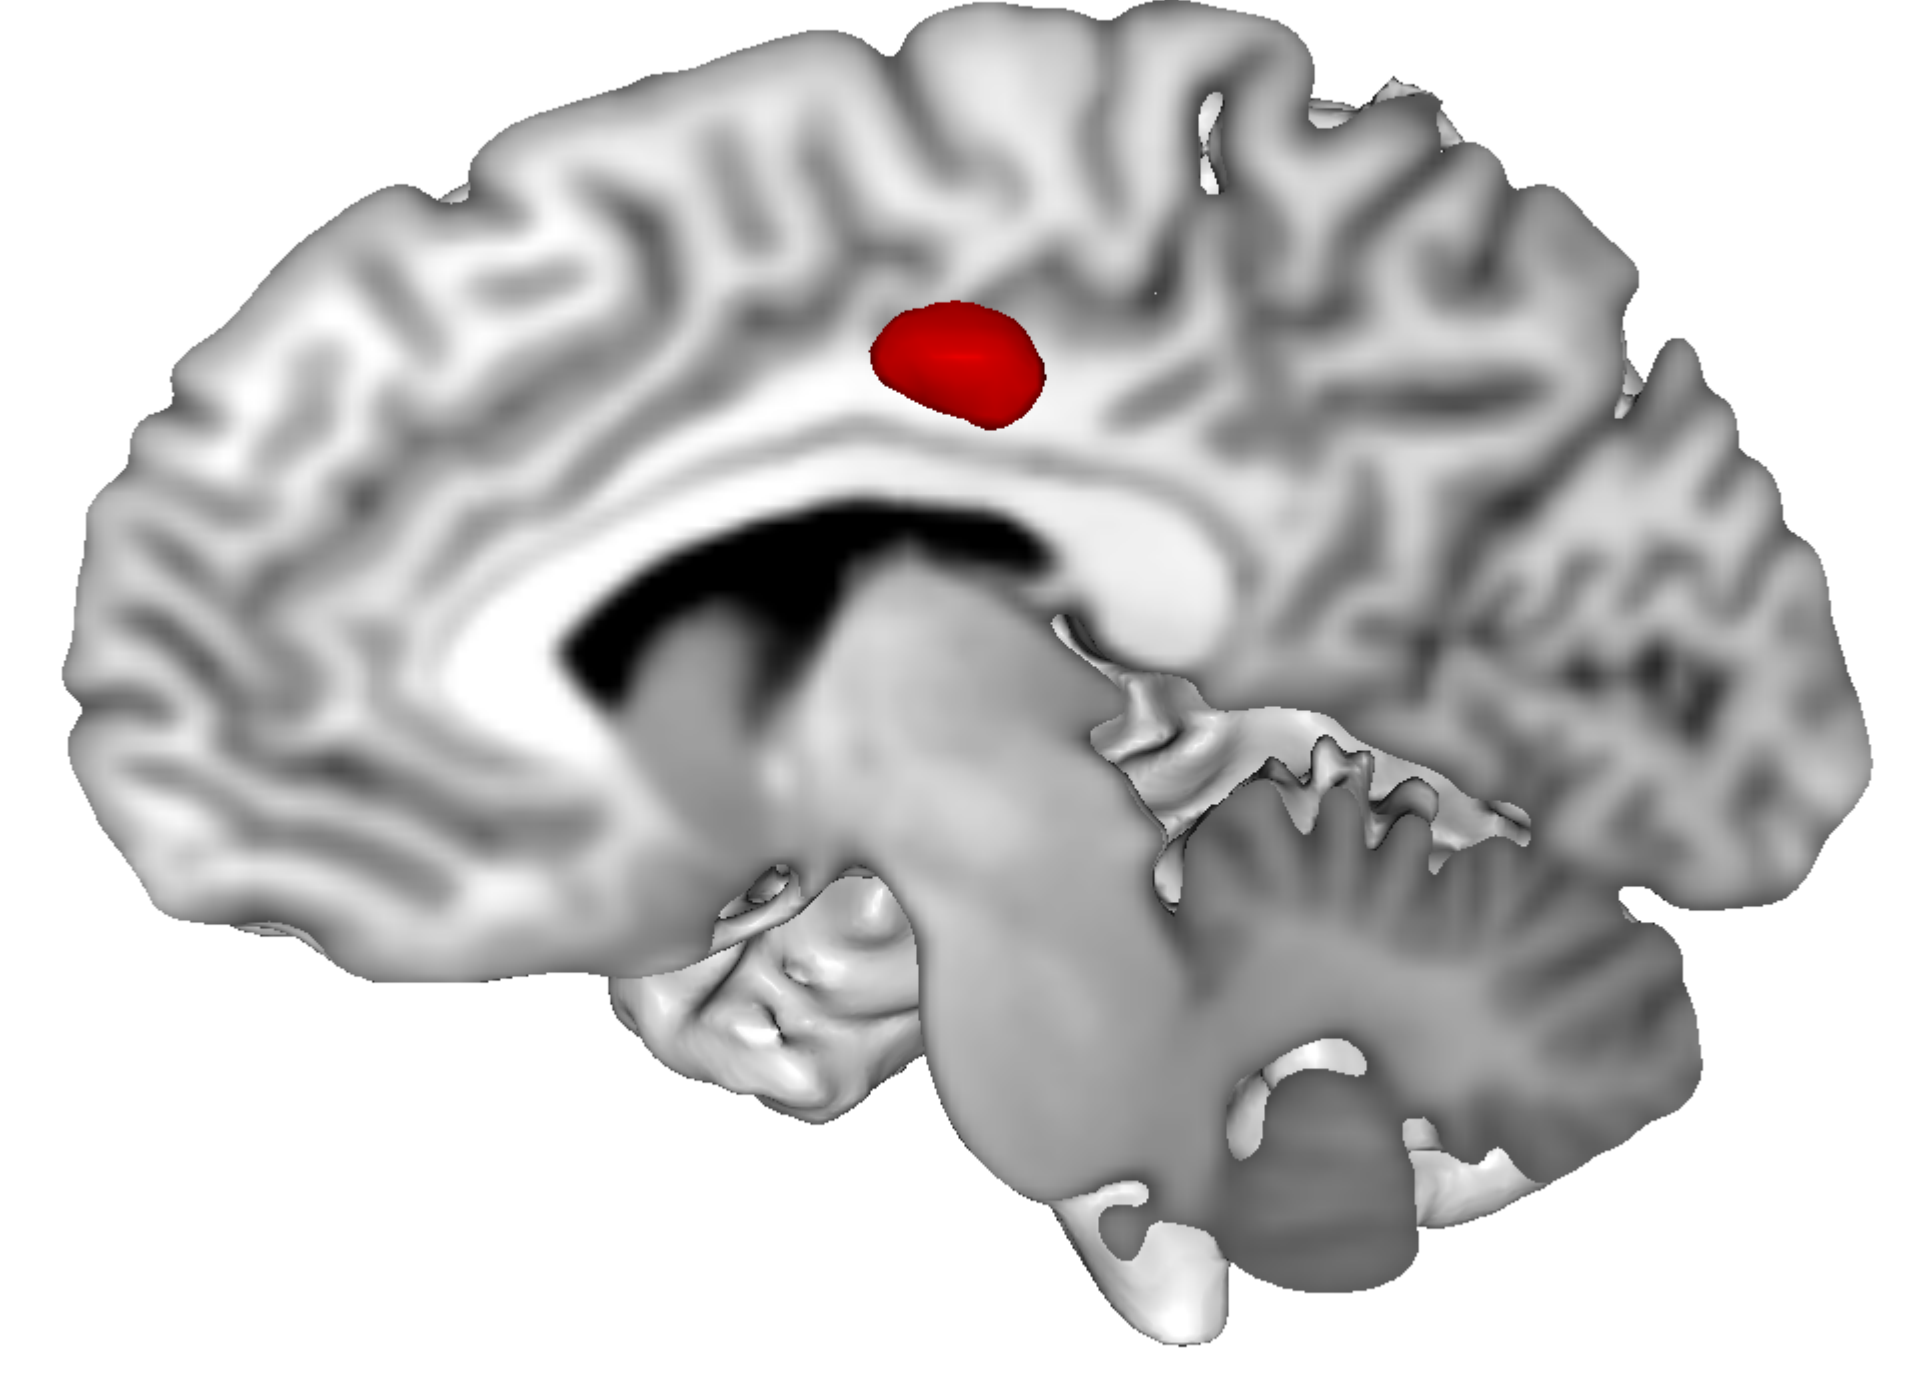

**B: ECM-ADD**

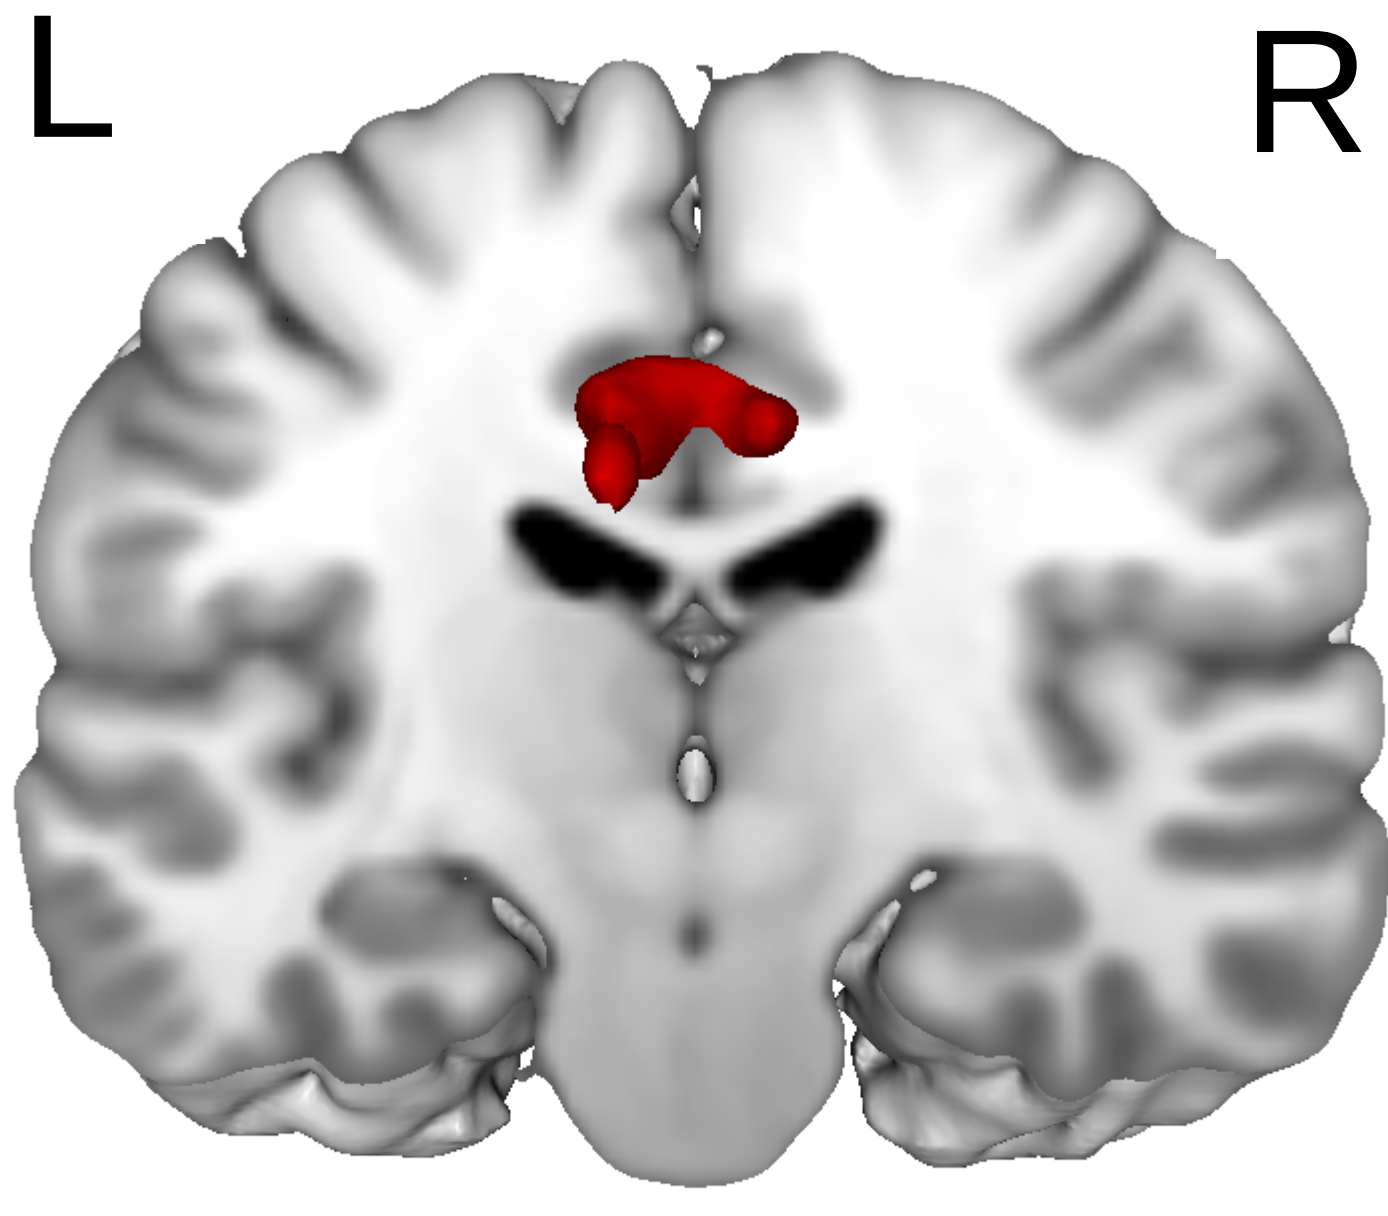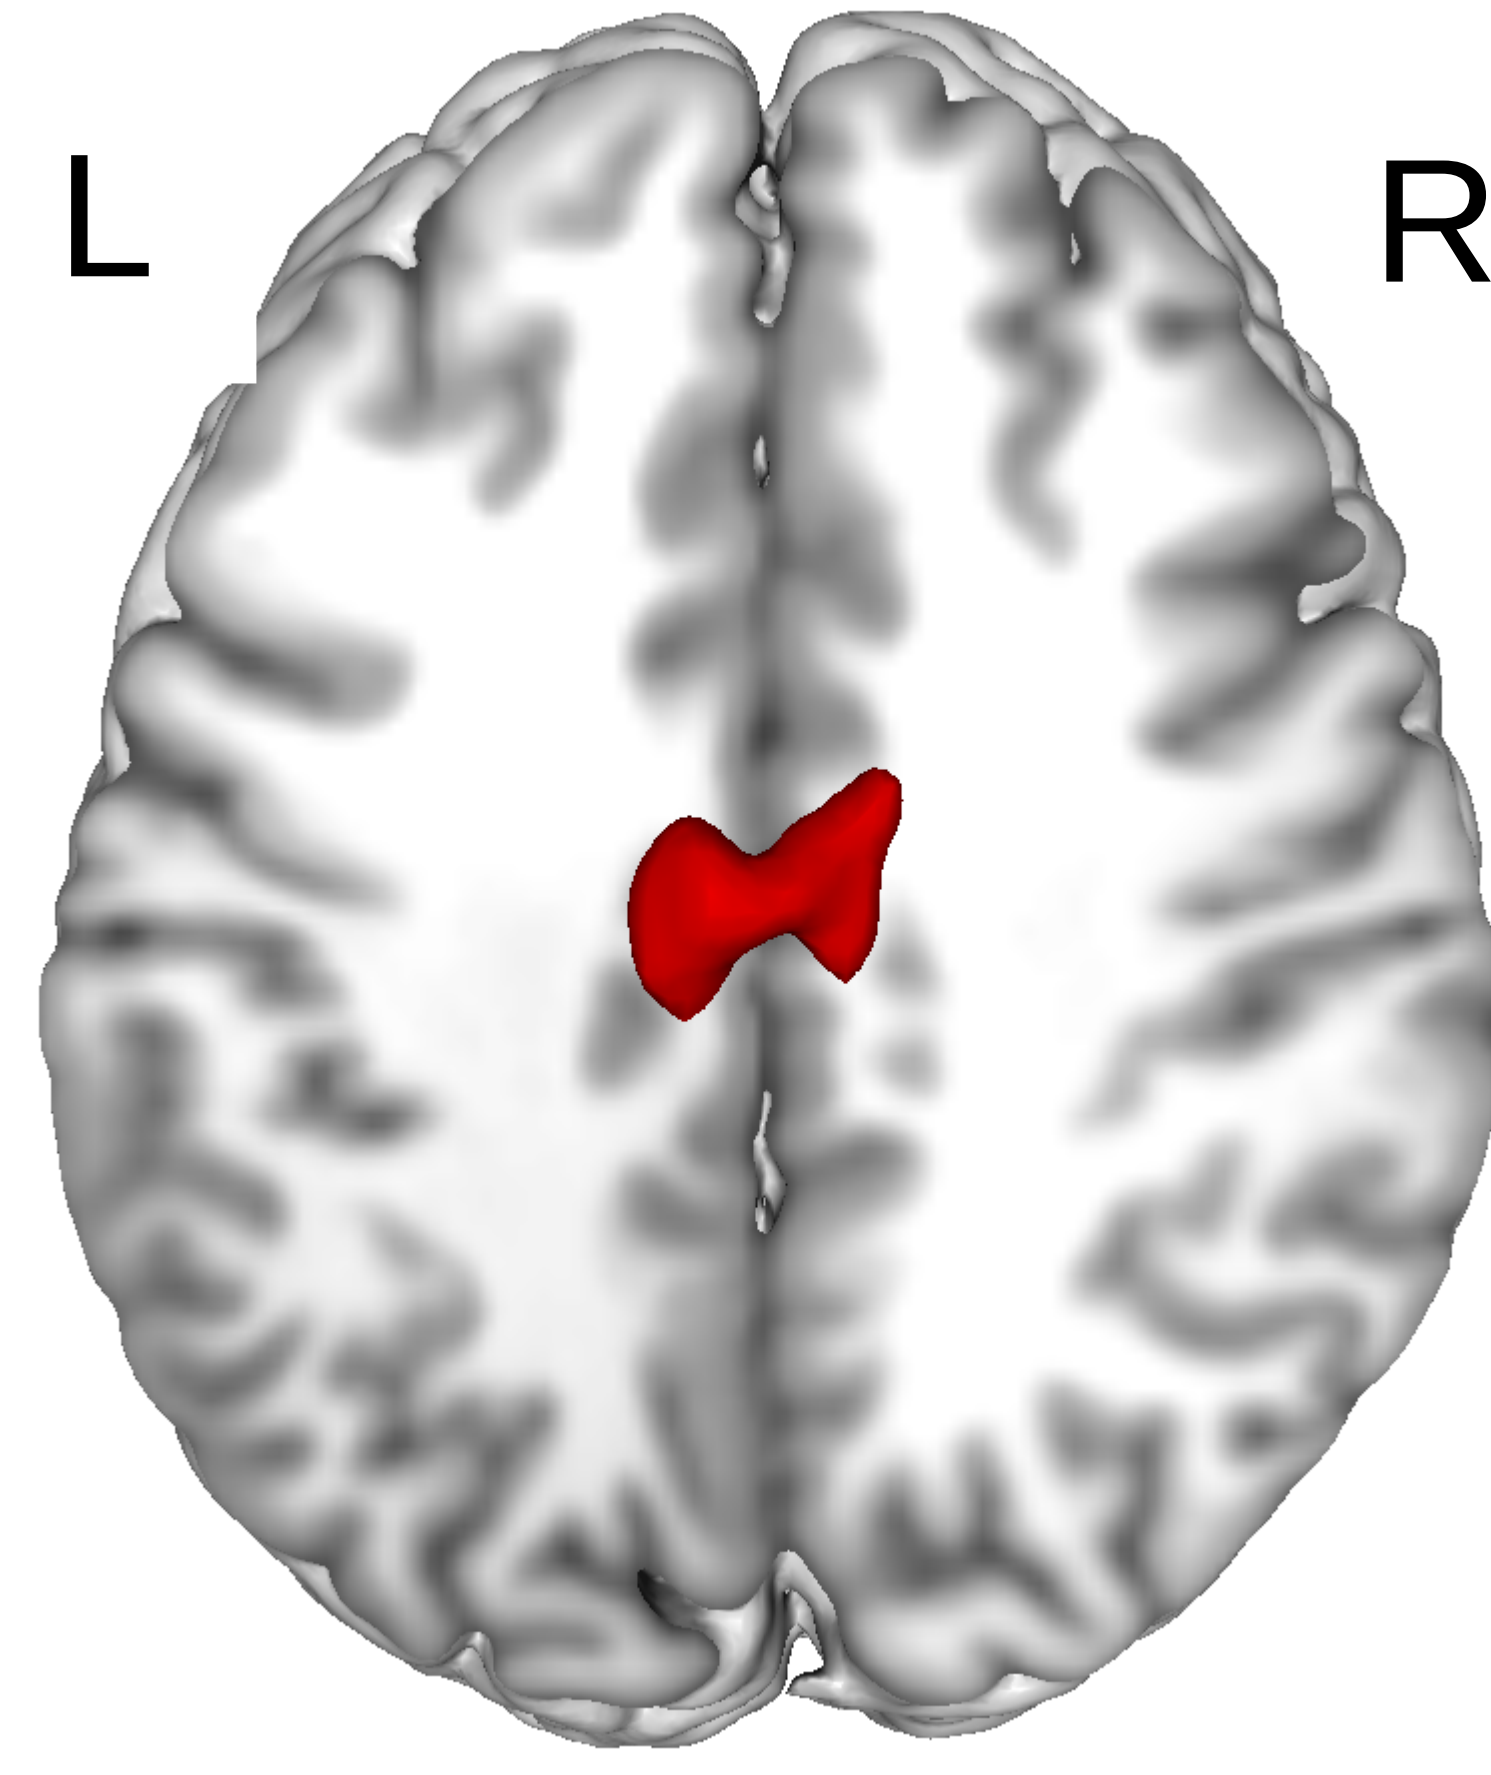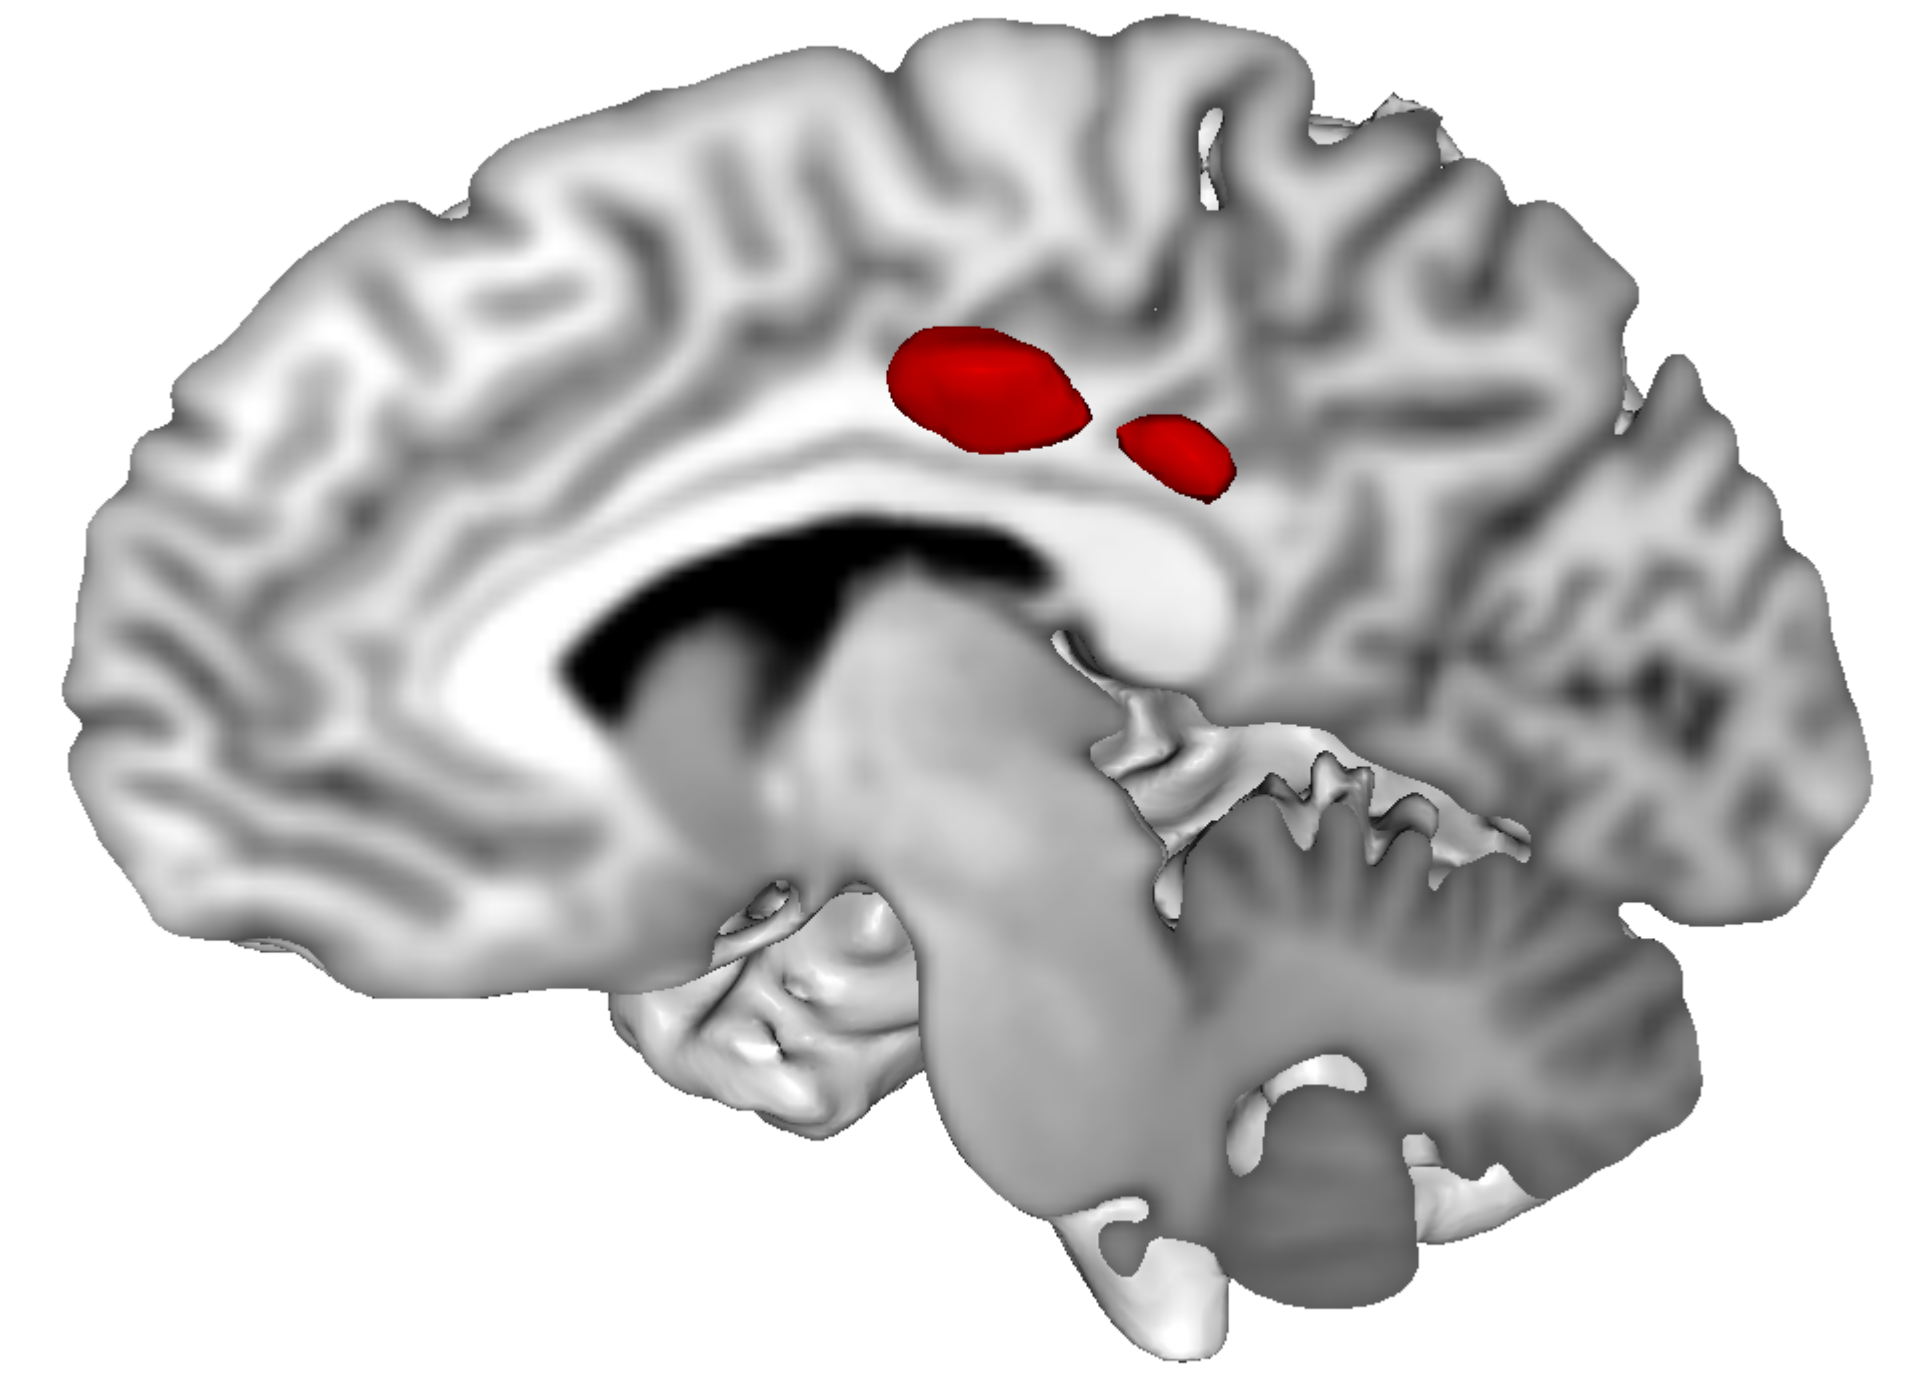

**C: ECM-RLC**

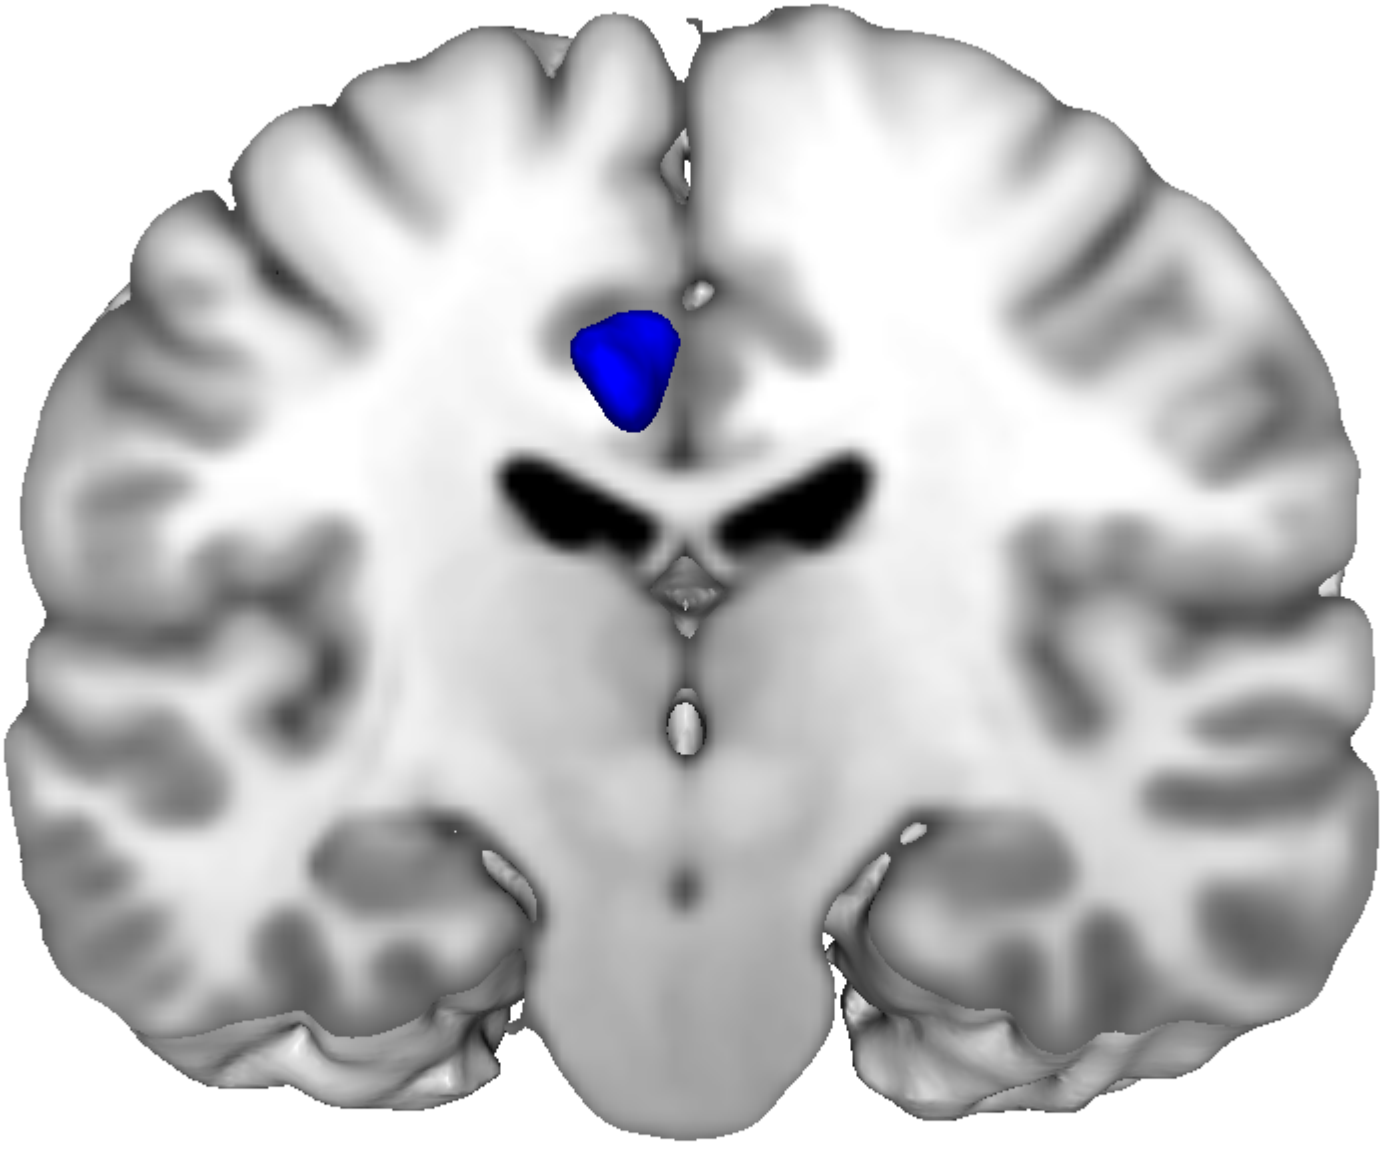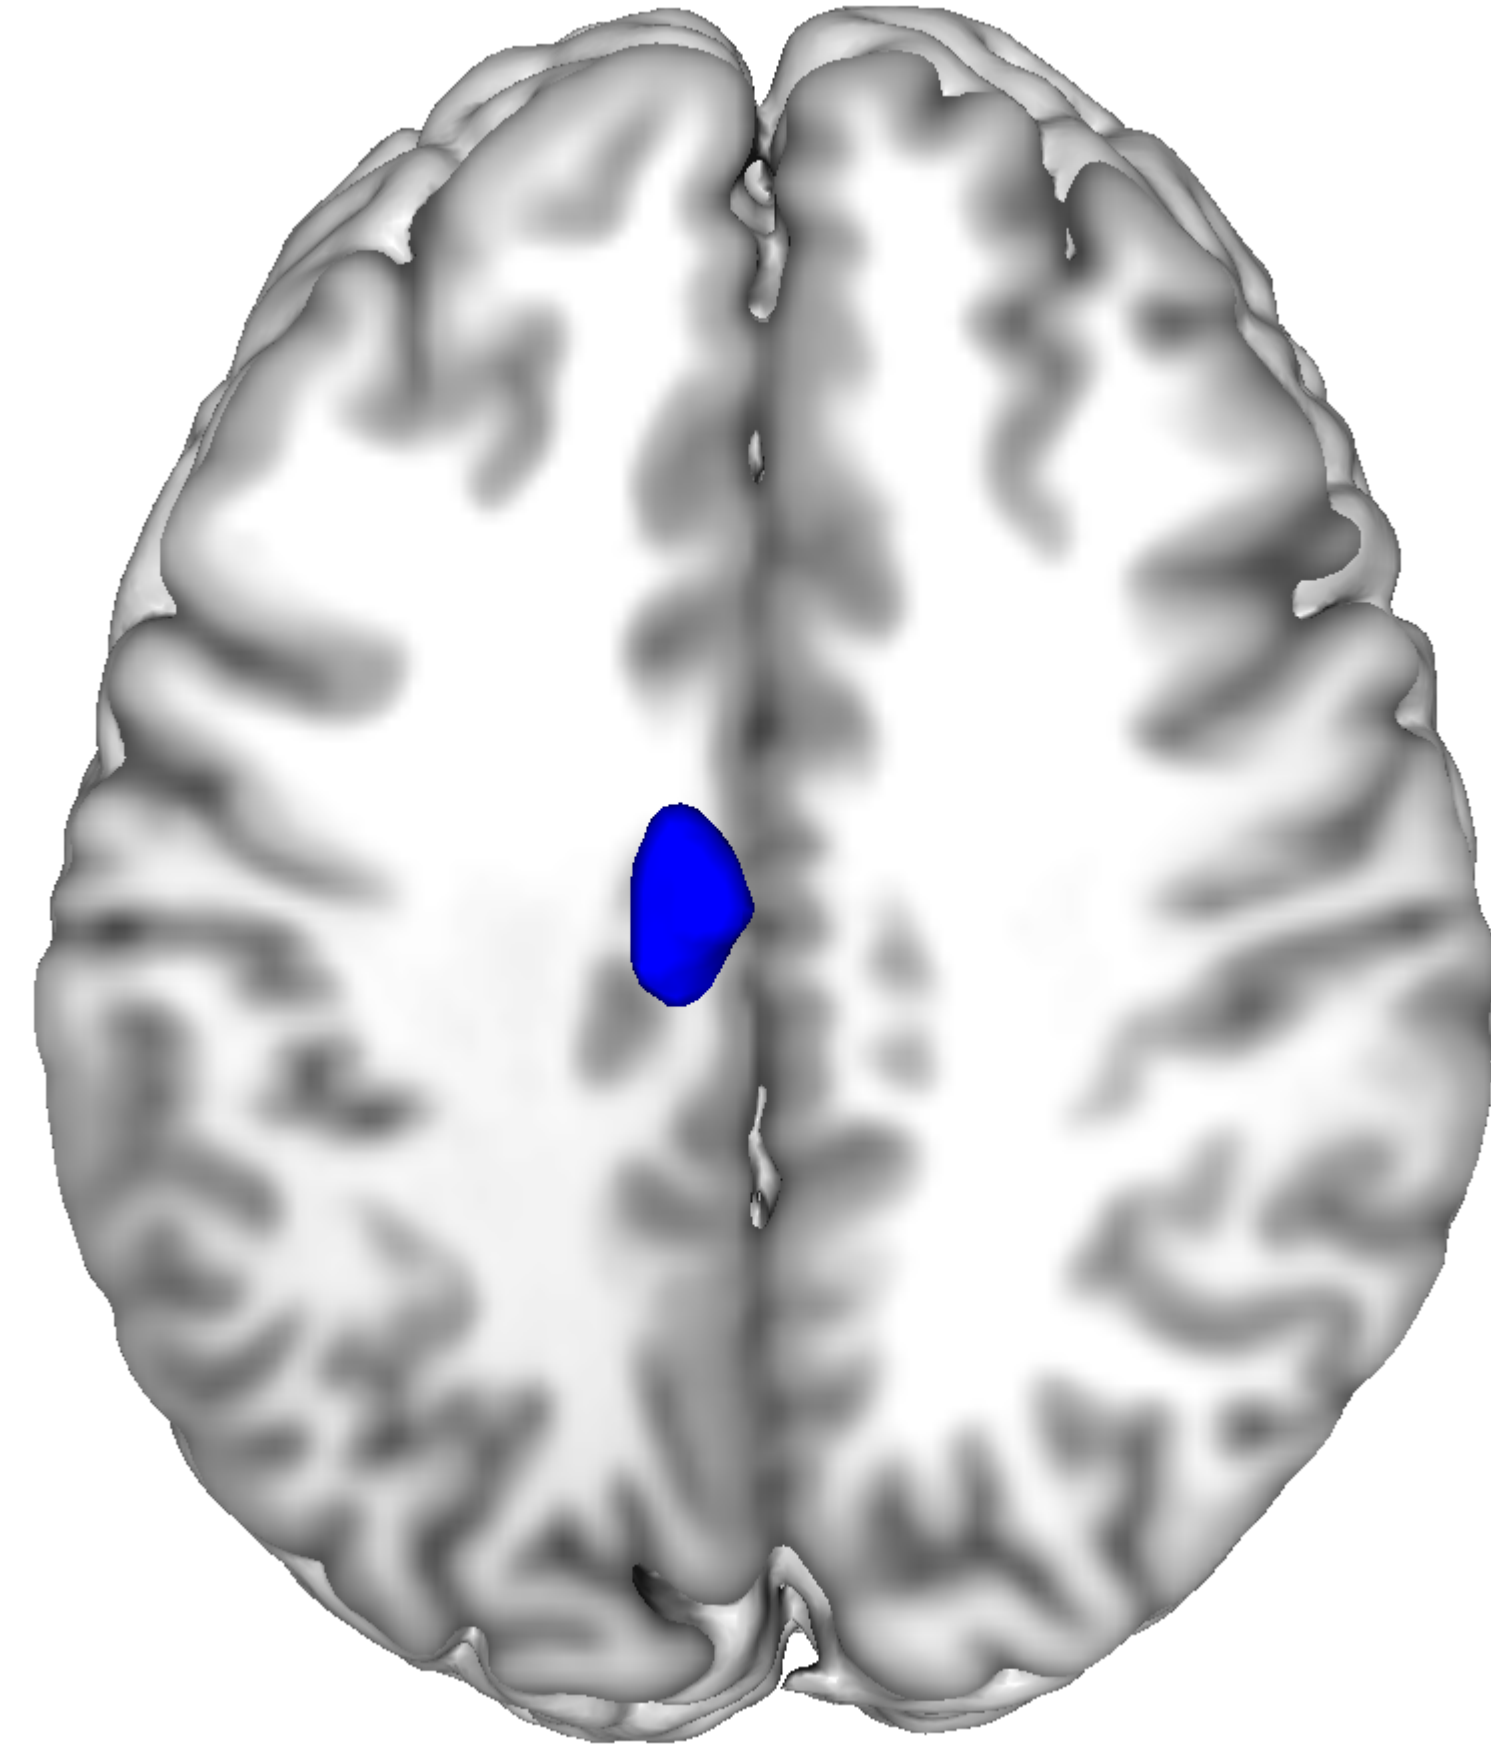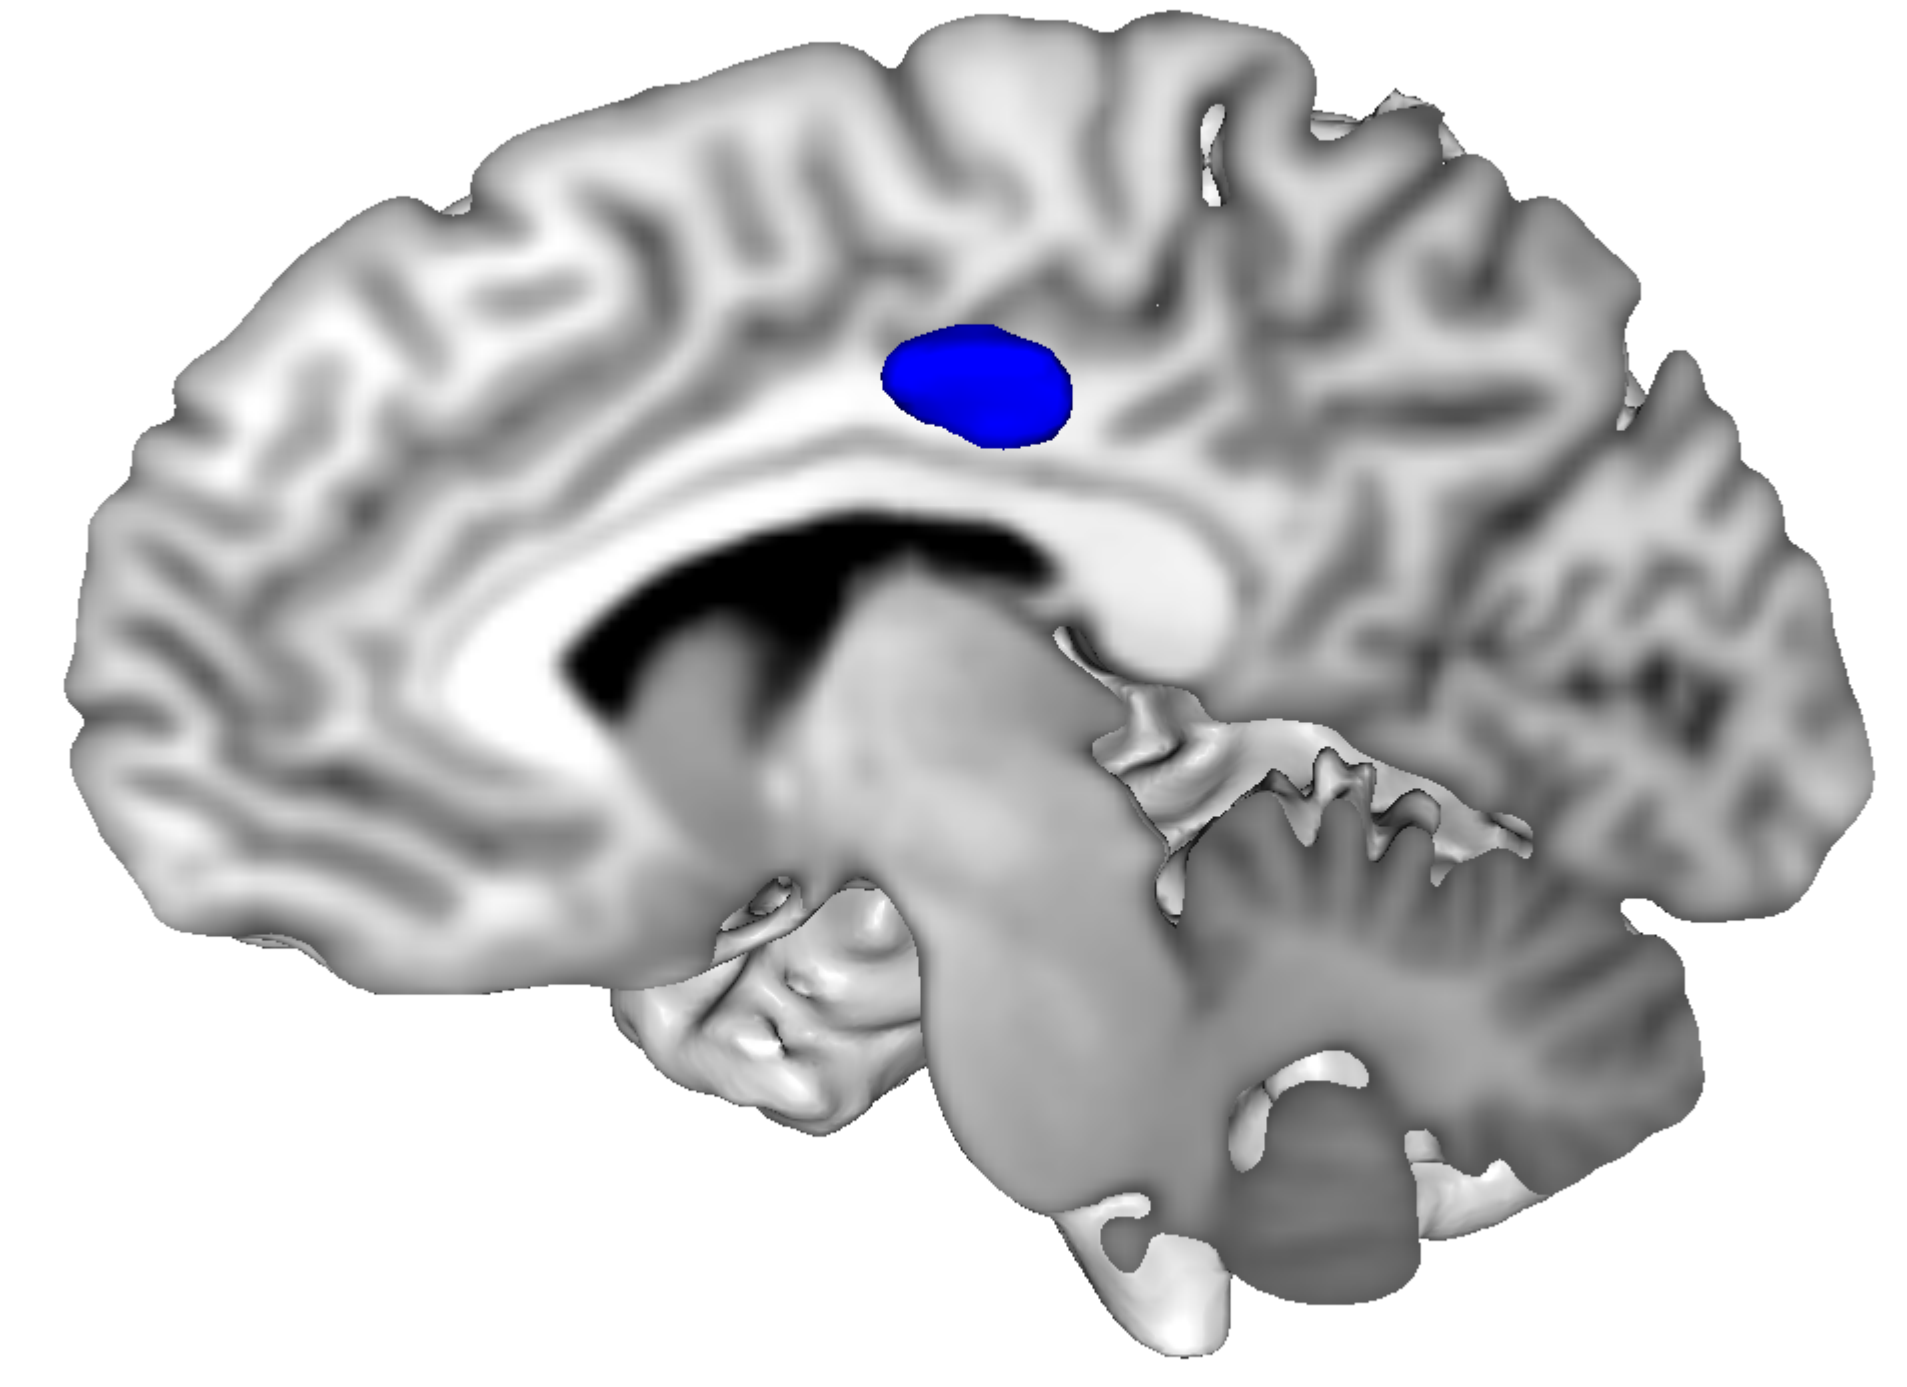

$y = -18$

$z = 36$

$x = -6$

**D: ICC**

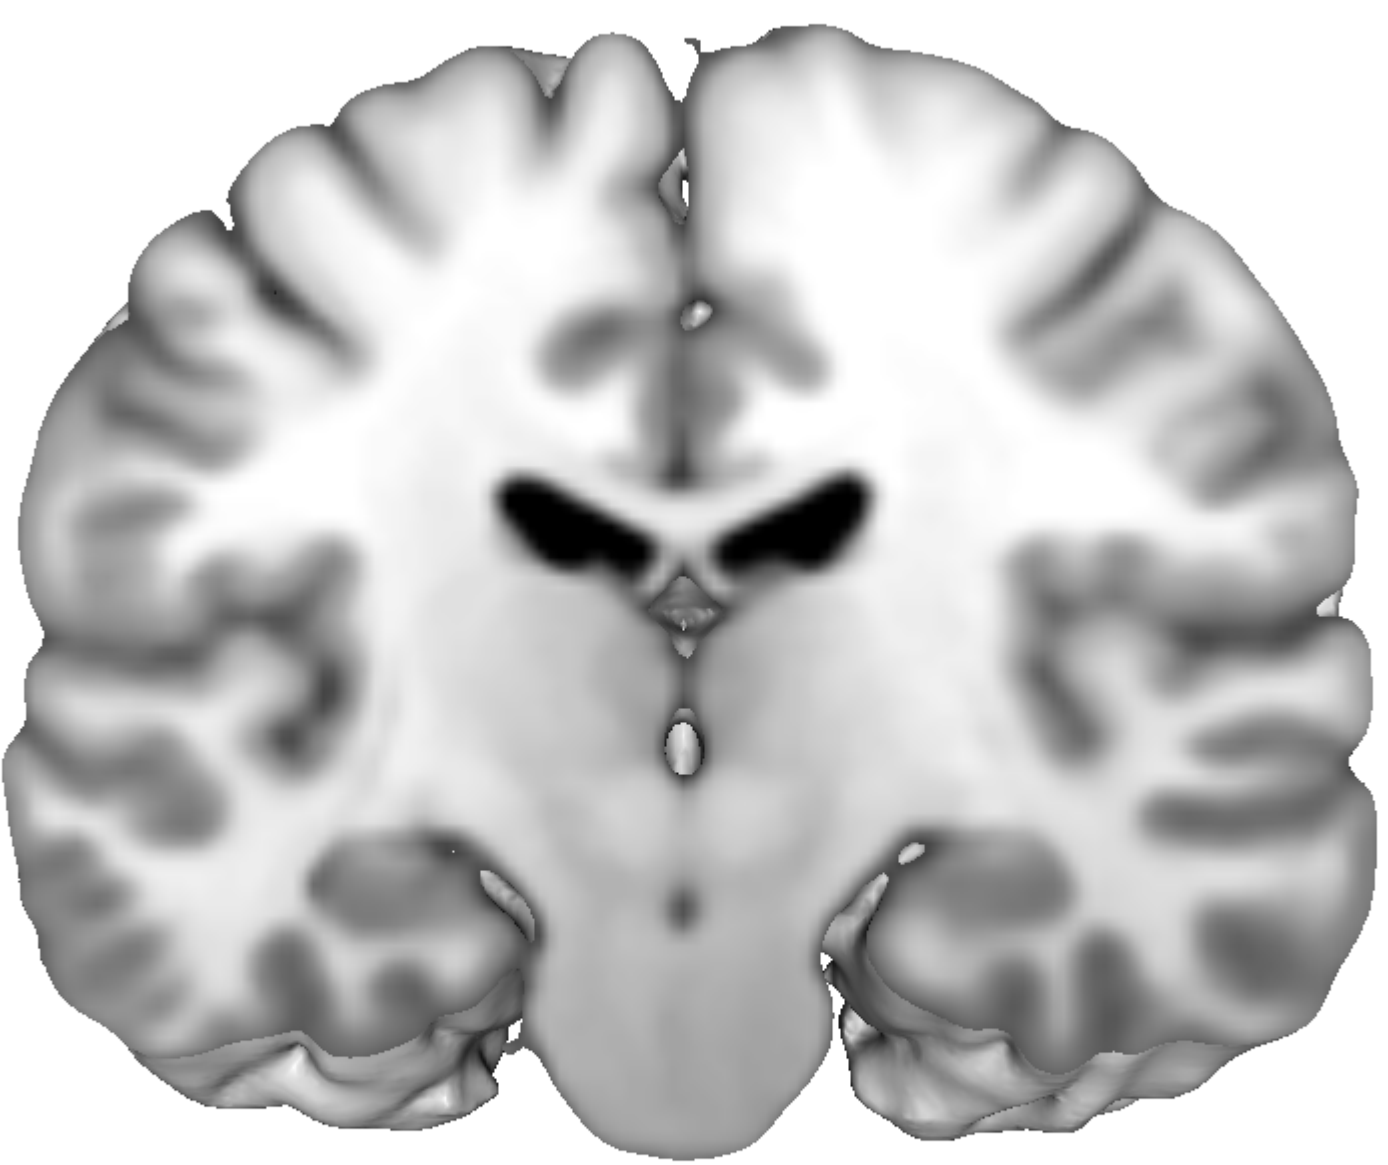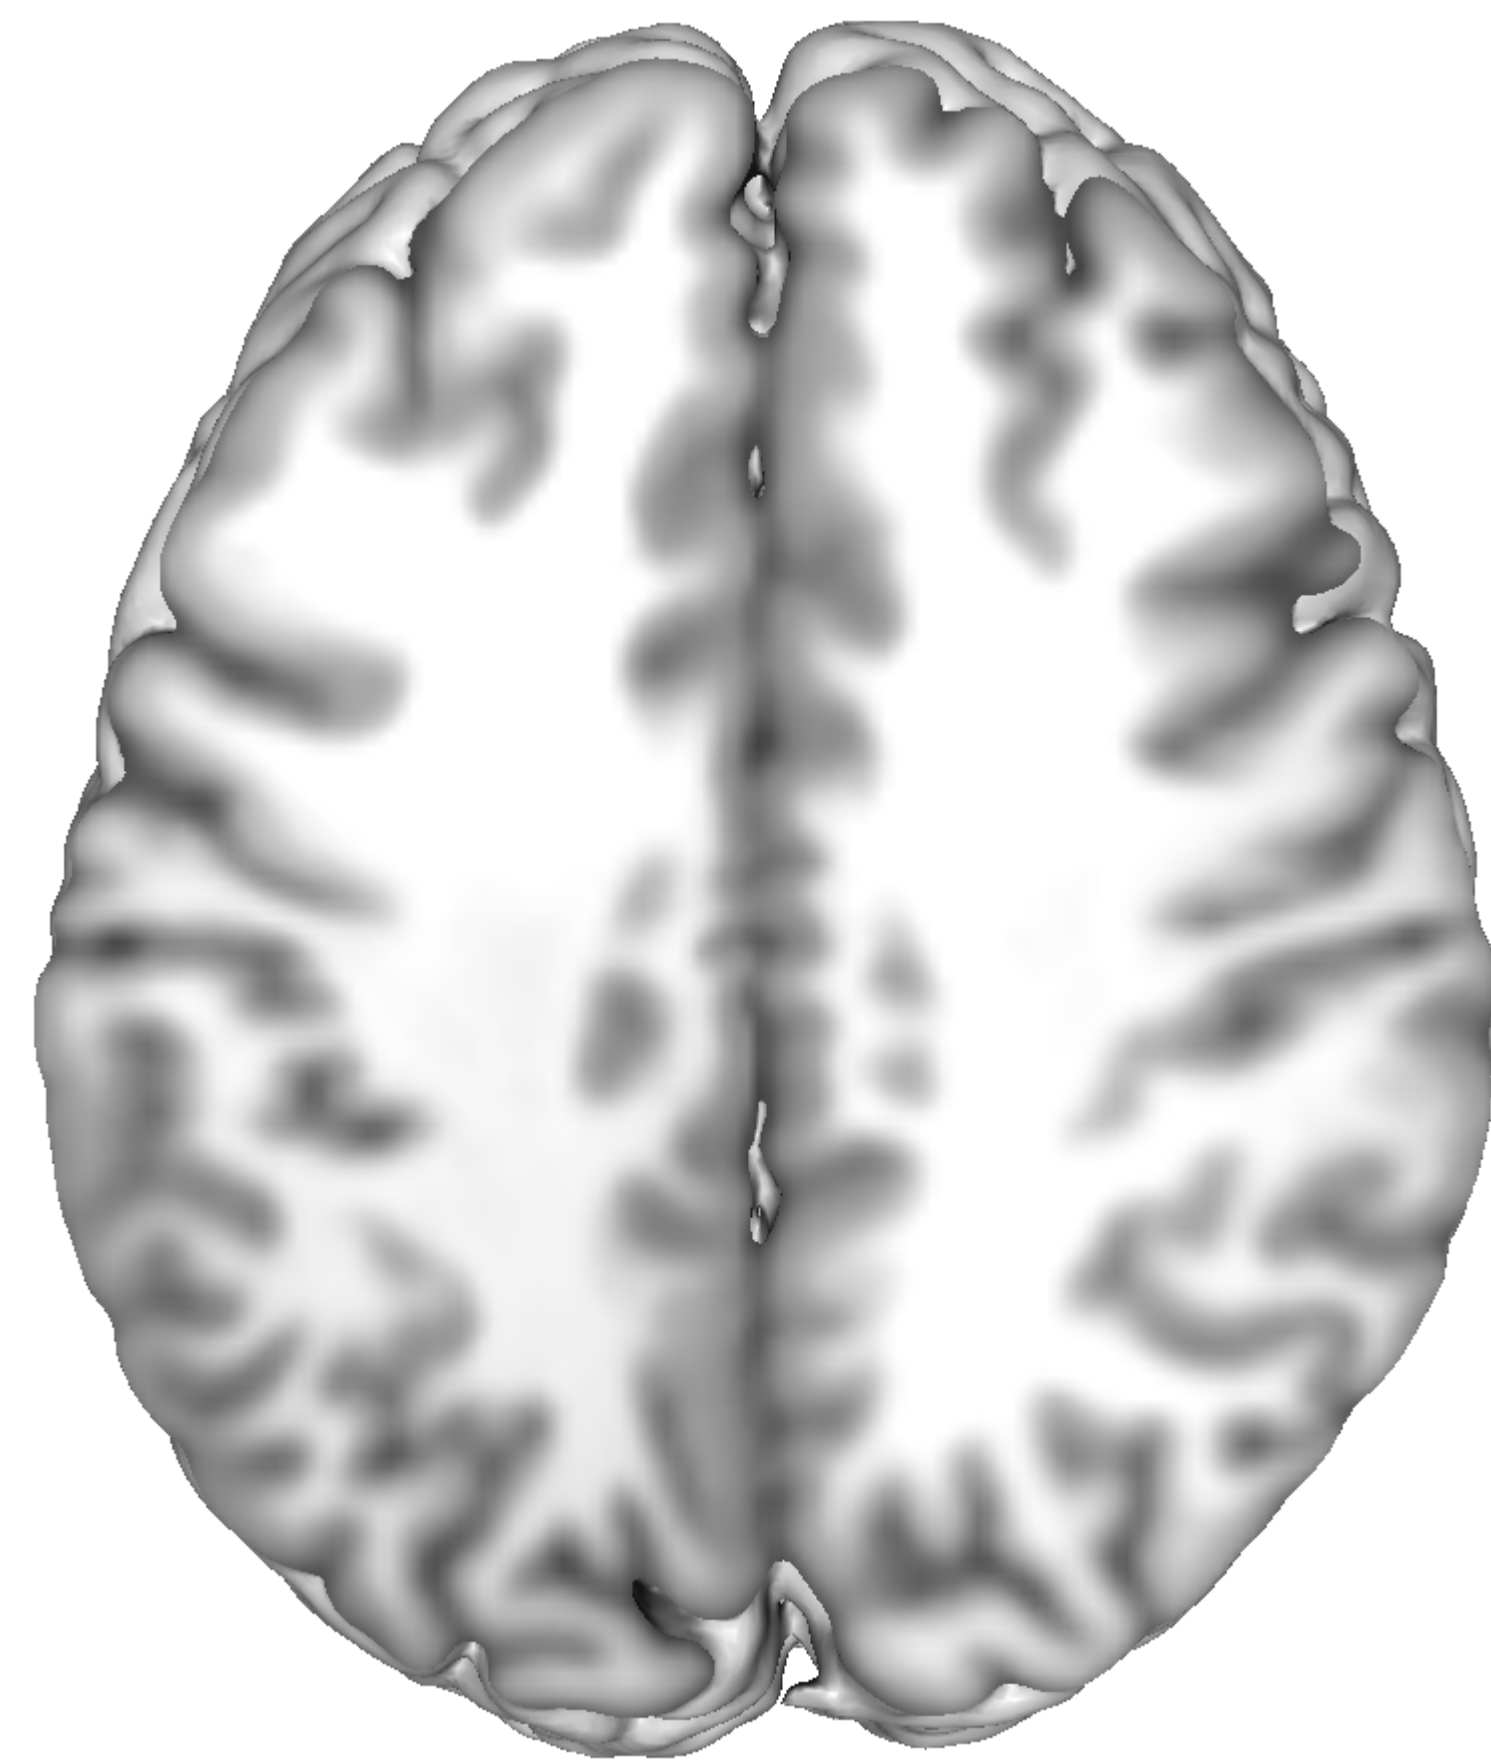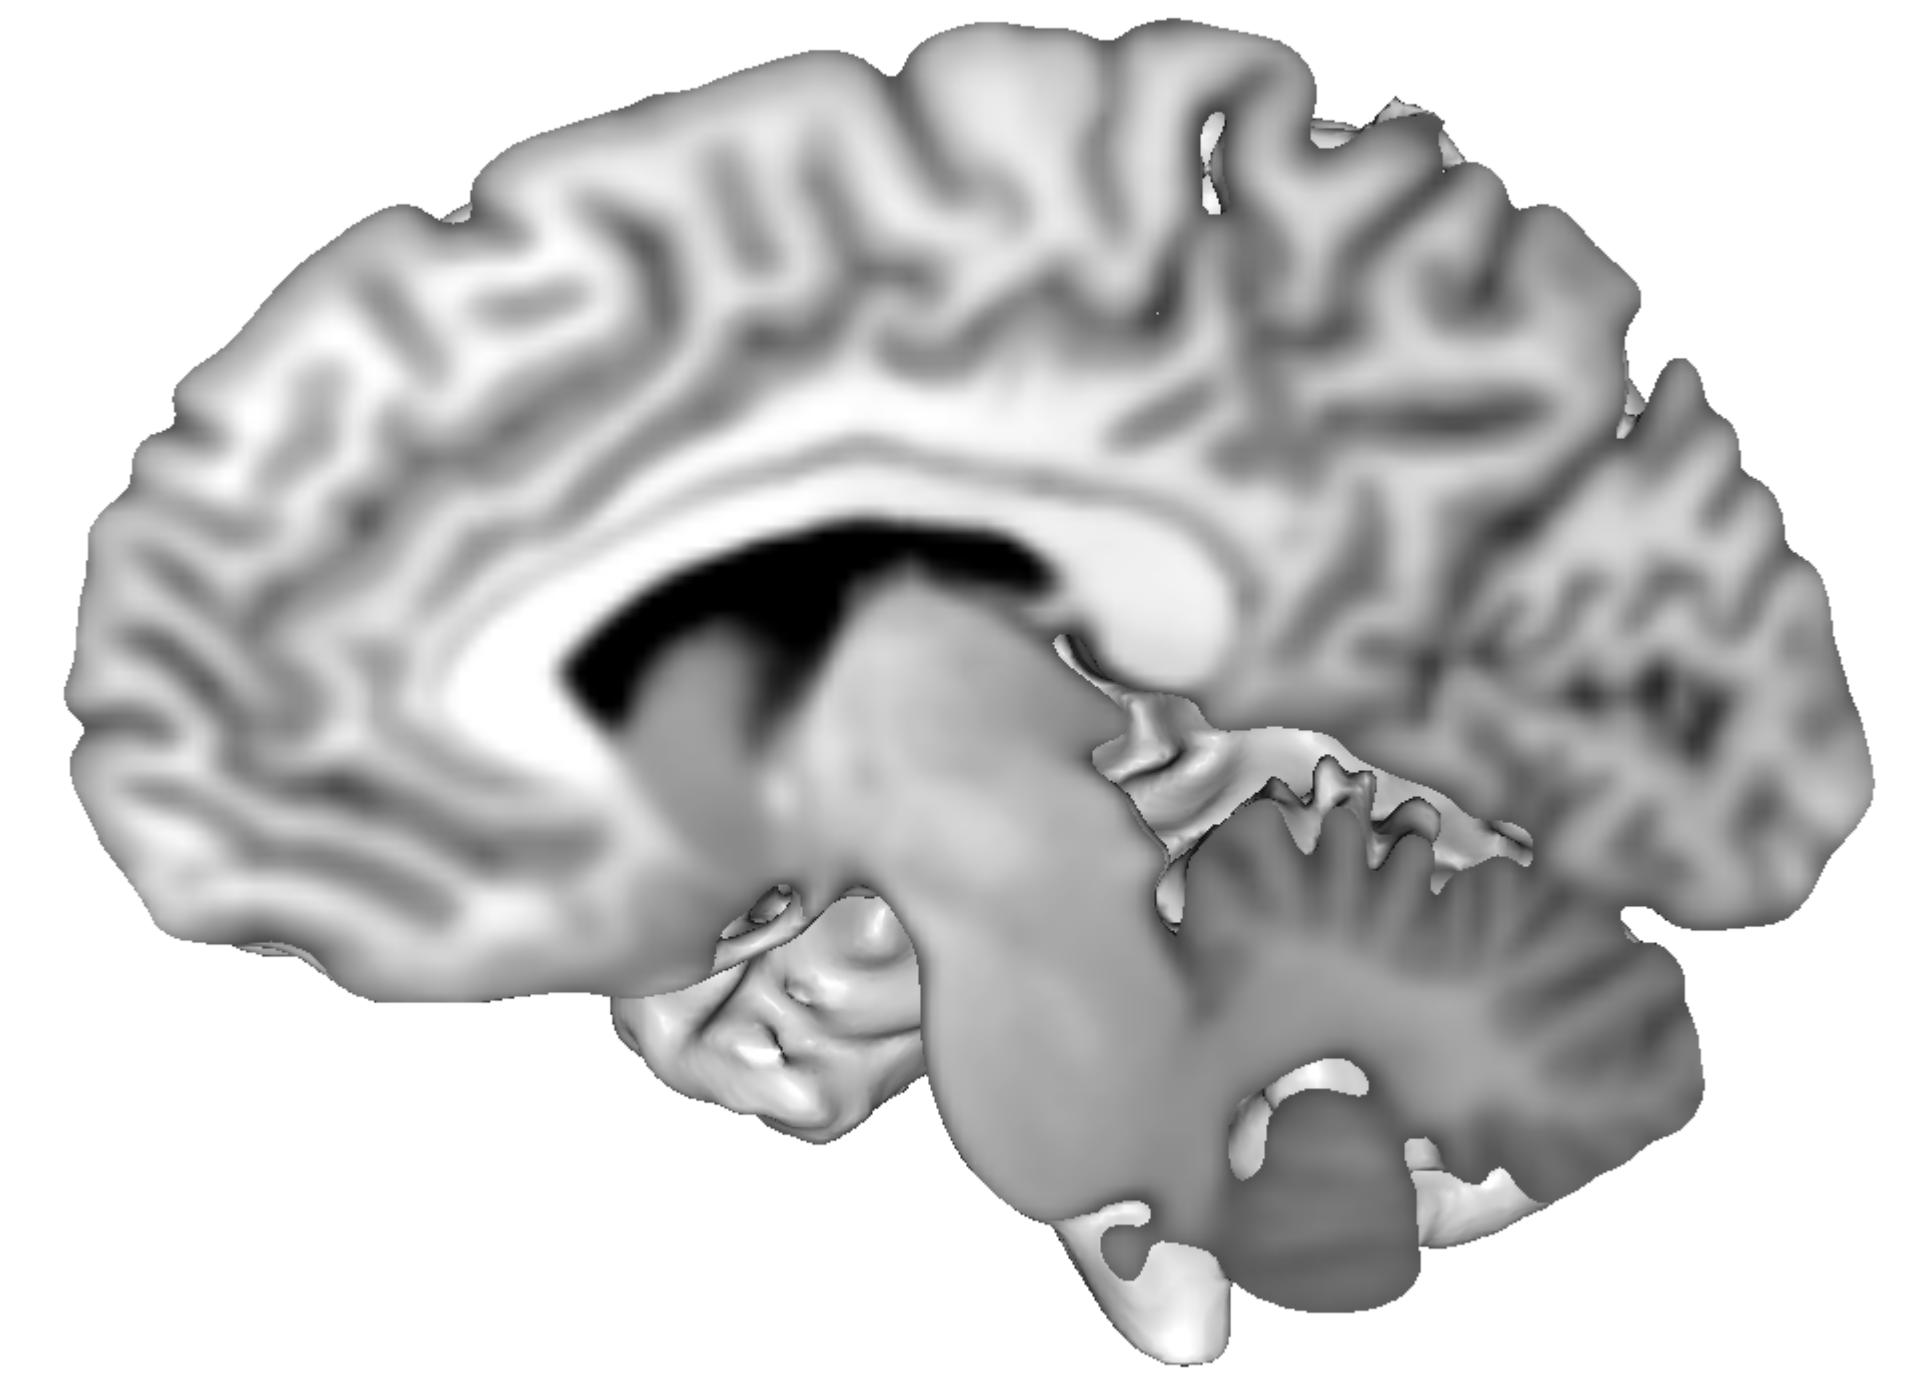

Supplement: mmc2.pdf [file mmc2.pdf]
