# Supplementary material for: Symptom-severity-related brain connectivity alterations in functional movement disorders
Source: PubMed Central journal article supplement (PMC8921488; doi:10.1016/j.nicl.2022.102981), 2022-03-03
Supplement: mmc3.pdf [file mmc3.pdf]

Seed-based correlation: FW > no-FW+

**A: Left TPJ**

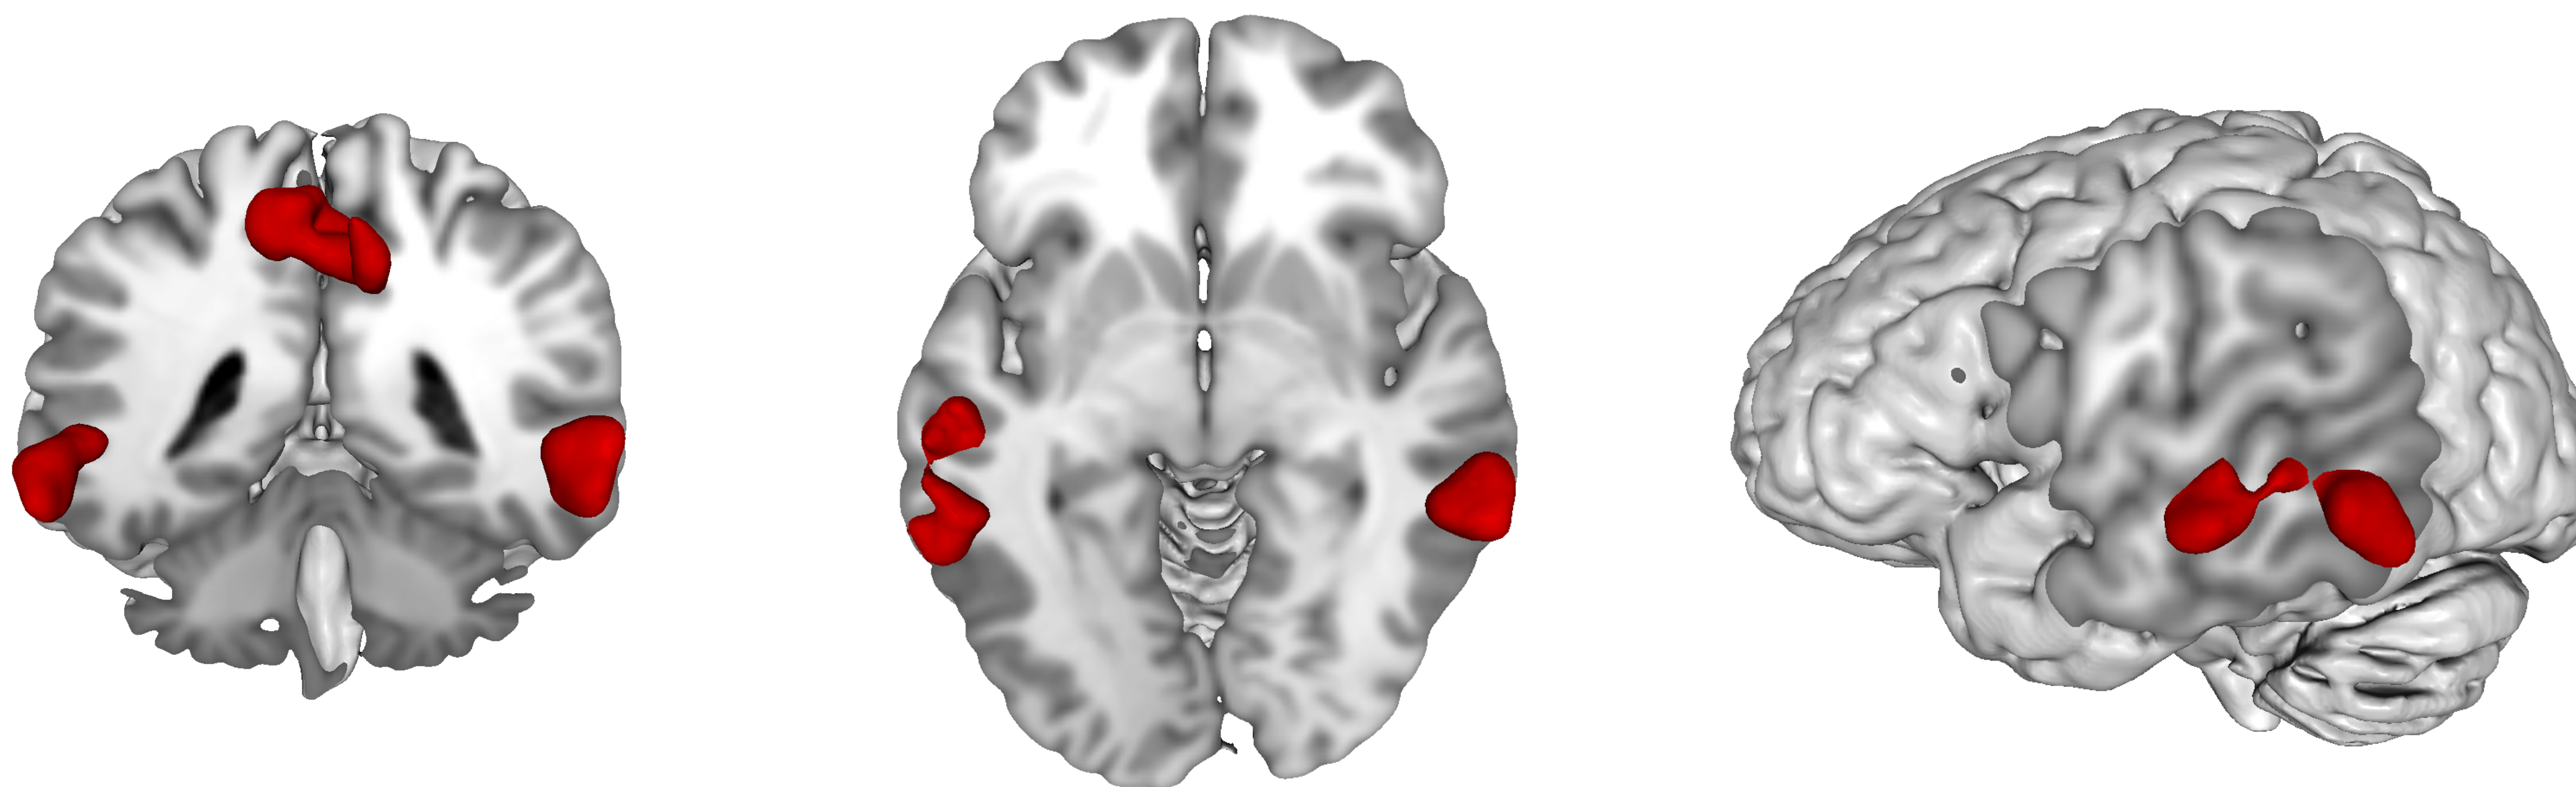

**B: Precuneus**

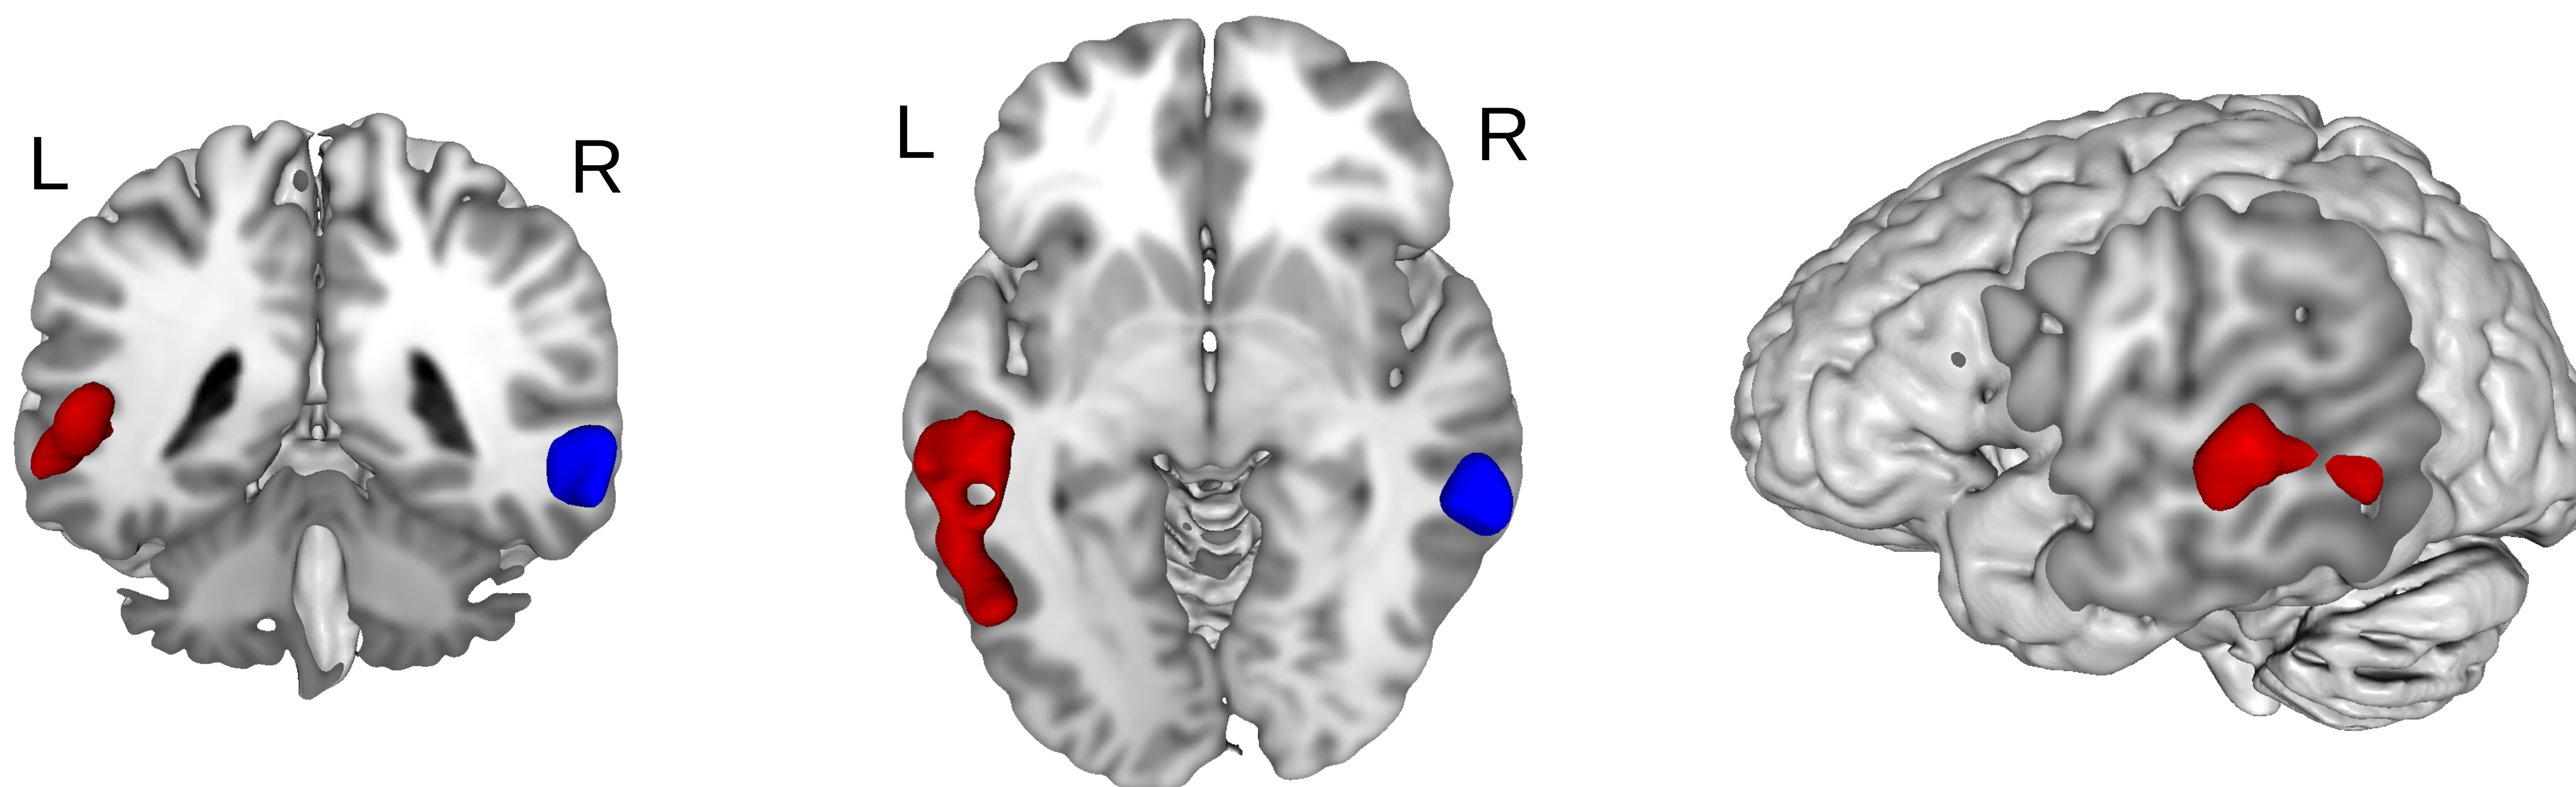

$y = -40$

$z = -2$

$x = -58$

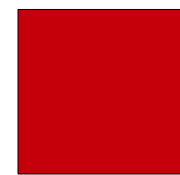  $P < 0.05$  FWE
