# Supplementary material for: Symptom-severity-related brain connectivity alterations in functional movement disorders
Source: PubMed Central journal article supplement (PMC8921488; doi:10.1016/j.nicl.2022.102981), 2022-03-03

corr(GCOR,SFMDRS)

A: FW

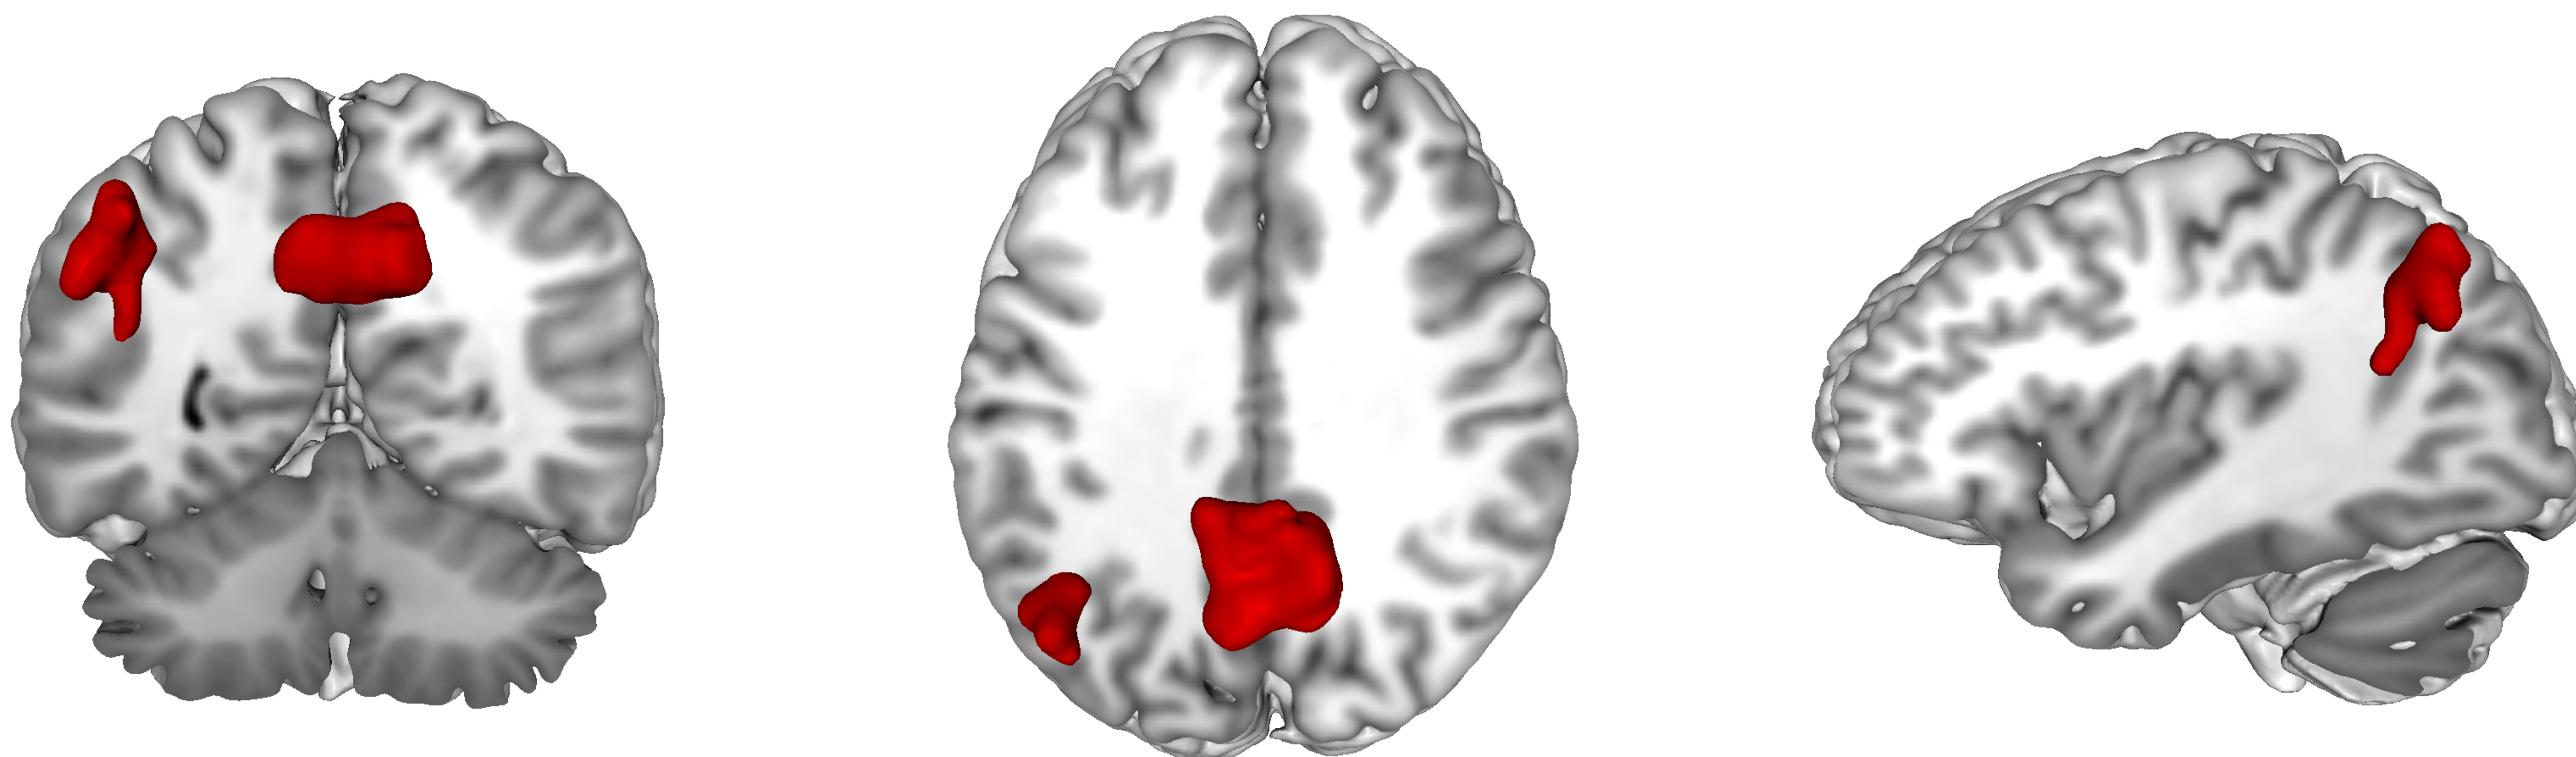

B: no-FW

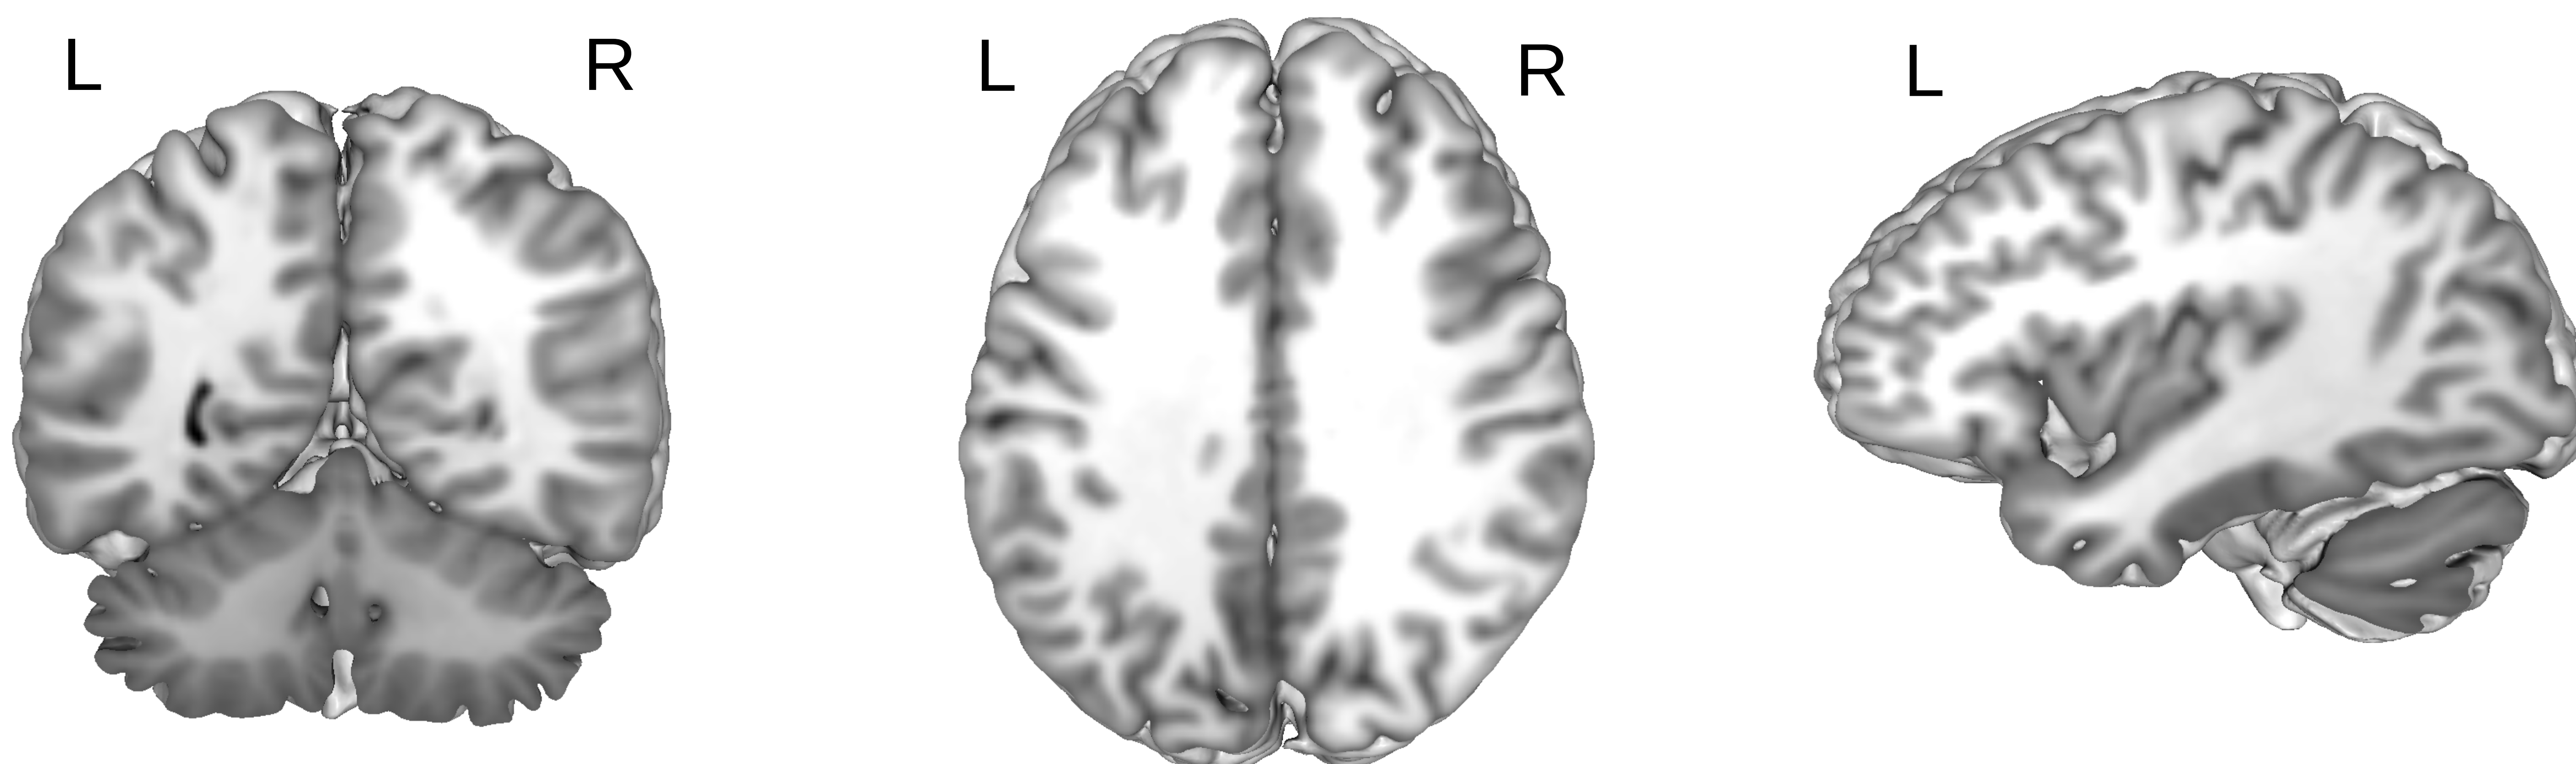

y = -54

z = 34

x = -38

C: FW - no-FW

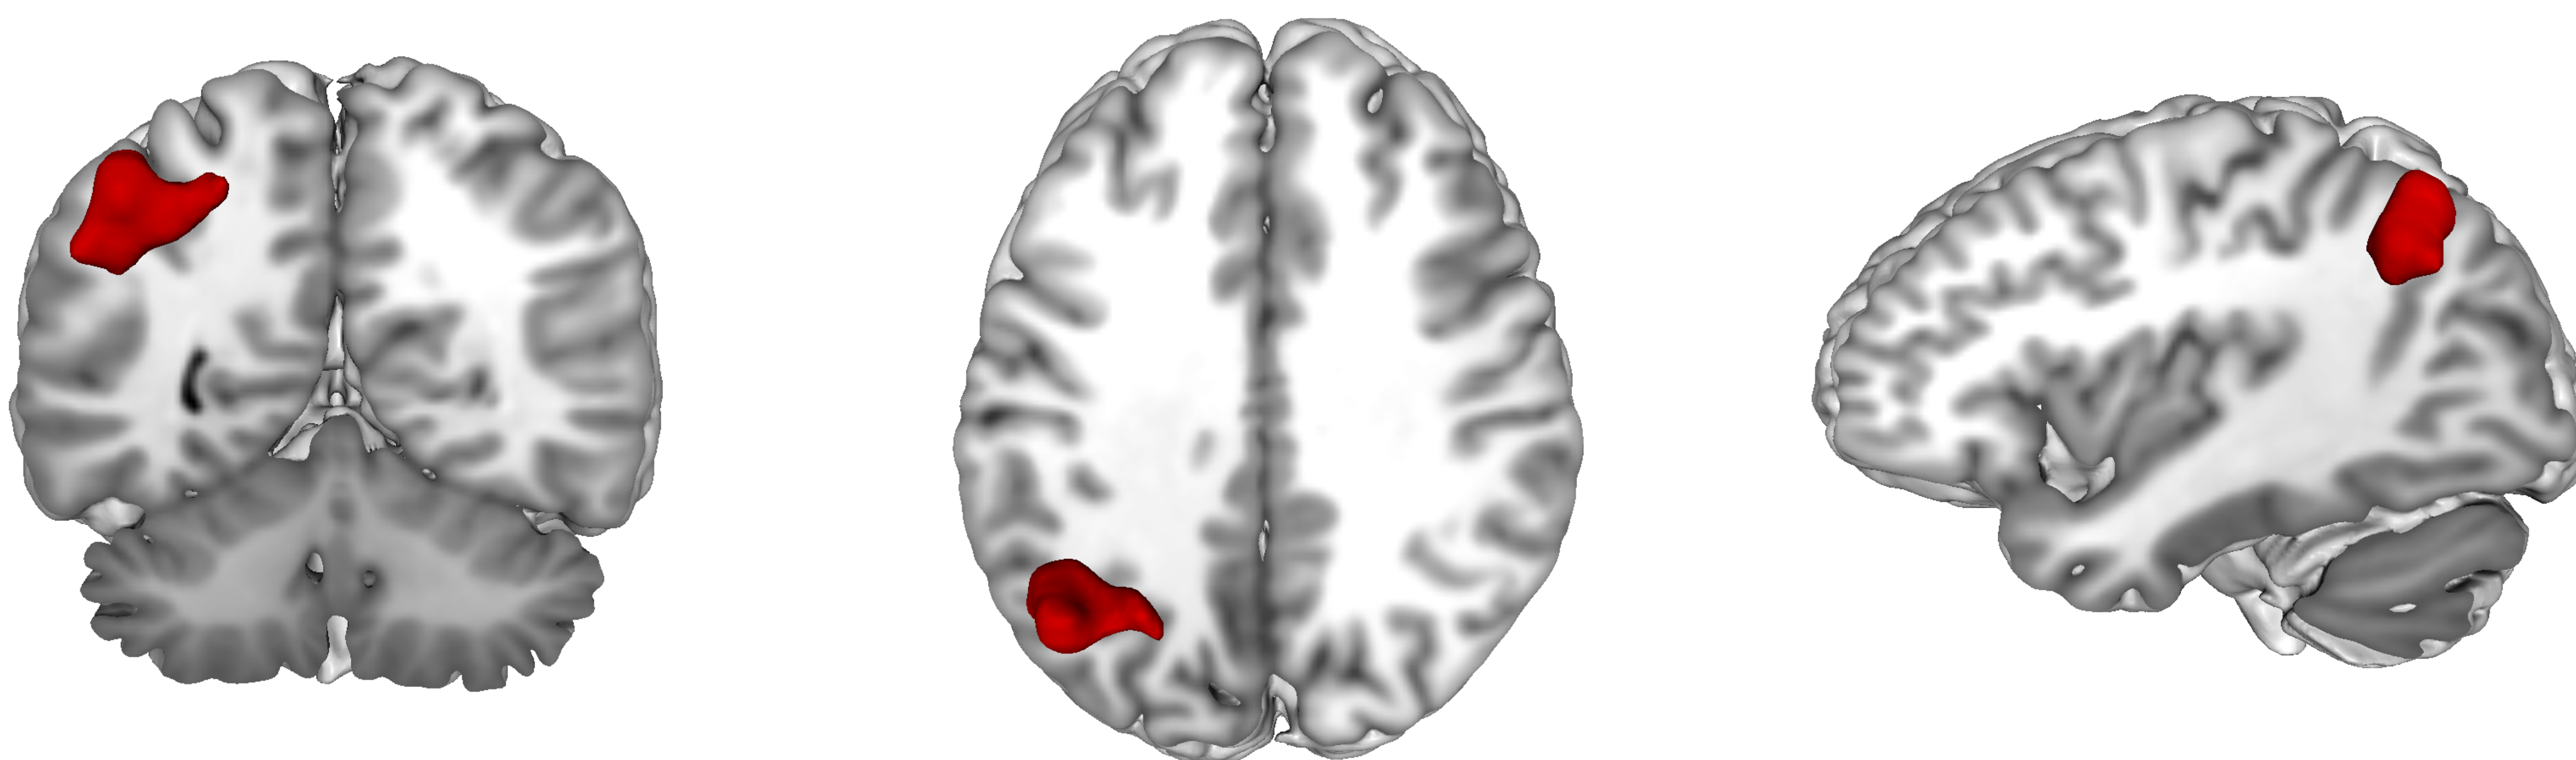

■ P < 0.05 FWE

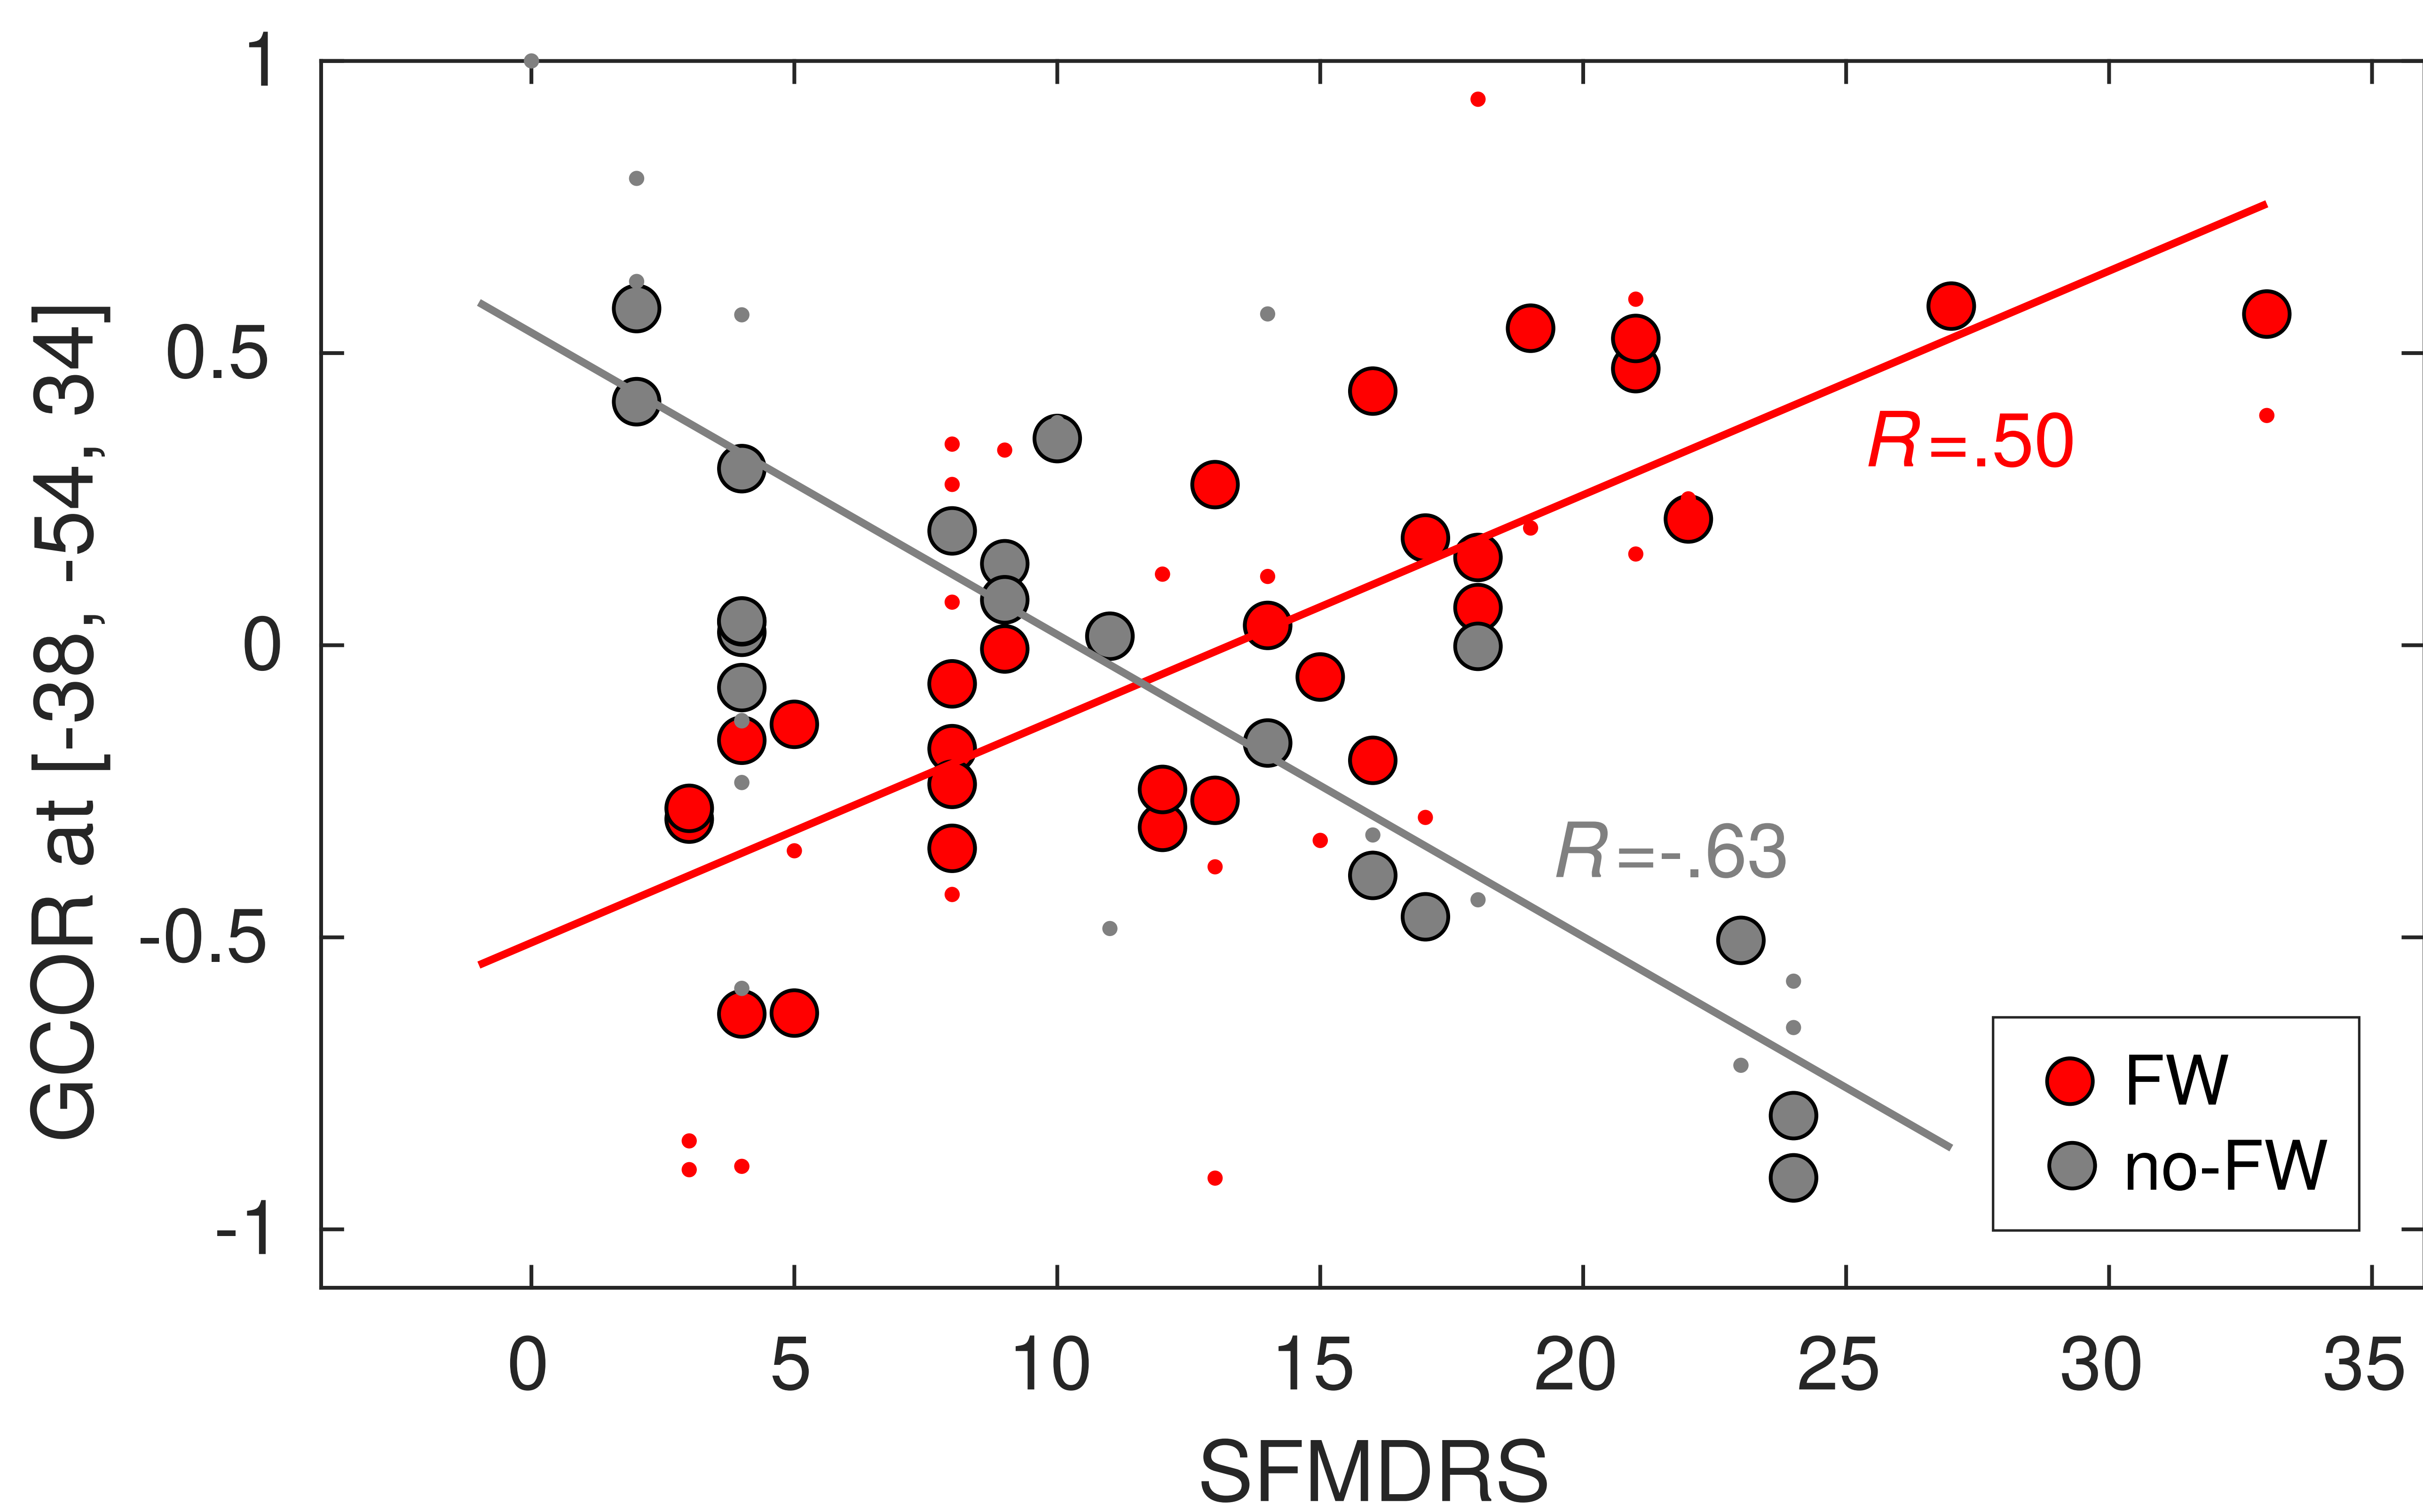

Supplement: mmc4.pdf [file mmc4.pdf]
