# Supplementary material for: Symptom-severity-related brain connectivity alterations in functional movement disorders
Source: PubMed Central journal article supplement (PMC8921488; doi:10.1016/j.nicl.2022.102981), 2022-03-03
Supplement: mmc5.pdf [file mmc5.pdf]

## Captions for Supplementary Figures

**Supplementary Figure S1. Brain network centrality increase with functional weakness (FW) using global correlation (GCOR).** The figure shows the same content as Figure 1, but when skipping nuisance regression during image pre-processing. [Significant GCOR differences were found in the precuneus and in the left temporoparietal junction (TPJ) comparing patients with and without FW (**A**: FW>no-FW, red color). Similar GCOR differences were found comparing FW patients and healthy controls in the same anatomical regions but without correction for multiple comparisons (**B**: FW>CON, blue color). The same result was obtained when comparing FW patients with all participants showing no FW (**C**: FW>no-FW+, red color). Bar plots show contrast estimates for the maximum voxel in the left TPJ and the precuneus. Significant results are shown in red with  $P<0.05$  using family-wise error (FWE) correction at cluster-level. x, y, z - coordinates in mm; L - left; R - right.]

**Supplementary Figure S2. Brain network centrality differences between patients with functional movement disorders showing no functional weakness (no-FW) and healthy controls (CON).** Compared with healthy controls, no-FW patients showed a centrality decrease in the posterior cingulate cortex with global correlation (**A**: GCOR) and both measures of eigenvector centrality (**B**: EC-ADD and **C**: EC-RLC, respectively). Results with GCOR and EC-ADD were shown with  $P<0.05$  using family-wise error (FWE) correction at cluster-level (red color) while the result with EC-RLC was only obtained without correcting for multiple comparisons (blue color). Note that no result was obtained using intrinsic connectivity (**D**: ICC) even when using an uncorrected threshold. x, y, z - coordinates in mm; L - left; R - right.

**Supplementary Figure S3. Orthogonal brain sections showing increased seed-based connectivity with functional weakness (FW) using the left temporoparietal junction (TPJ) and the precuneus as seed-regions.**

Comparing between participants with FW and without FW (no-FW+) revealed a significant FW-related connectivity increase between both seed regions (**A:** left TPG; **B:** precuneus) and the left and right middle temporal gyrus (MTG). In addition, when using the left TPG as seed region (**A:**), FW-related connectivity increase was also obtained between left TPG and precuneus. Significant results are shown in red with  $P < 0.05$  using family-wise error (FWE) correction at cluster-level. Using the precuneus as seed region (**B:**), the right MTL was only obtained without FWE correction (color-coded in blue). x, y, z - coordinates in mm; L - left; R - right.

**Supplementary Figure S4. Positive correlation between global correlation (GCOR) and the simplified functional movement disorder rating scale (SFMDRS) in patients with functional weakness (FW).**

The figure shows the same content as Figure 4, but when skipping nuisance regression during image pre-processing. [(**A:**) Within the group of FW patients, a significant positive correlation between GCOR and SFMDRS was obtained in the precuneus and in the left temporoparietal junction (TPJ). (**B:**) No significant correlation was obtained in the group of patients showing no FW (no-FW). (**C:**) A significant interaction between the factors GROUP (FW/no-FW) and SFMDRS was found in the left TPJ. Significant results are shown in red with  $P < 0.05$  using family-wise error (FWE) correction at cluster-level. x, y, z - coordinates in mm; L - left; R - right. The dot-plot on the bottom shows the GCOR-values in the left TPJ for the FW group (in red color) and for the no-FW group (in gray). The bigger dots show the fitted GCOR values within the statistical model while the smaller dots show the zero-mean GCOR values.]
